# Supplementary material
Source: Copernicus journal article supplement (doi:10.5194/egusphere-2026-1412)
Supplement: Supplementary file [file egusphere-2026-1412-AC3-supplement.pdf]

# **Response letter for *Advancing the Capabilities for Efficient Hurricane-Centric Simulations with the Atmospheric Model ICON***

## **Response to reviewer #3:**

We sincerely thank the reviewer for this thorough and insightful assessment. Your detailed comments and thoughtful suggestions have been invaluable in improving our manuscript. The technical questions you raised have led us to refine our analysis and clarify important methodological aspects of our work. We particularly appreciate your constructive feedback on the spin-up analysis and the alternative initialization procedures - these have strengthened our analysis and outlook part significantly. We are grateful for the time and care you invested in reviewing our study.

**Review of egusphere-2026-1412: Advancing the Capabilities for Efficient Hurricane-Centric Simulations with the Atmospheric Model ICON, Authors: Senf, F. and Cremer, R.**

## **Summary**

The authors present an automated workflow toolkit that enables the efficient simulation of tropical cyclones on a sub-kilometre scale. This is achieved by running the ICON model sequentially on multiple overlapping grid segments along the cyclone's expected path. Tailored to the ICON model, the toolkit automates several key tasks, including cyclone tracking, grid generation and the preparation of initial and boundary data, as well as conducting the high-resolution segment-based runs. The toolkit's key components rely on existing software packages, such as tobac for cyclone tracking, DWD ICON Tools for grid generation, and CDO for horizontal remapping.

The workflow toolkit is demonstrated using Hurricane Pauline (2020) with nested high-resolution simulations performed using grid sizes down to 300 m. The authors compare different configurations of the grid segments and conduct performance measurements on two different state-of-the-art HPC systems. They also discuss shortcomings of their approach, focusing on spin-up effects resulting from the remapping and merging of the initial conditions. Based on their findings the authors conclude that, compared to traditional approaches with one fixed limited-area domain, the efficiency gains are significant, reducing resource requirements by a factor of 13–175 depending on the configuration details. They also conclude that the observed spin-up effects are acceptable, given the substantial efficiency gains achieved.

## **General comments**

The manuscript is well written and concise. It makes a valuable contribution to the scientific topic of how to conduct km-scale tropical cyclone simulations at a reasonable cost. The proposed workflow toolkit appears to be scientifically sound in most respects and is clearly described. The authors also effectively demonstrate the efficiency of their approach. The visual presentation of a Lagrangian cyclone analysis prototype is well designed, too.

However, I believe the manuscript requires a more detailed analysis of how the preparation of the initial conditions impacts simulation quality. I am not convinced that the analysis of the spin-up effects presented provides sufficient evidence to conclude that the negative impacts on simulation quality are sufficiently small. I have summarised potential pathways towards an extended model evaluation be-

low. In summary, I recommend that the manuscript be reconsidered for publication once the following major points have been addressed.

We would like to emphasize that we have made considerable efforts to better quantify the spin-up effects. The following points summarize our approach in this regard:

- We have improved the calculation of the spinup effect. It is now derived from temporally overlapping simulations. To achieve this, we created special sensitivity runs in which each segment was extended by three hours, and those additional three hours were compared with the first three hours of the subsequent segment. This adjustment follows a major comment from Reviewer #2.
- We added the mean pressure tendency as a diagnostic to our sensitivity simulations in order to provide a clearer picture of the dynamic adjustment processes. In this response we have inserted the temporal evolution of these diagnostics at the appropriate points.
- We carried out the sensitivity experiment with the proposed LBC flag and incorporated the results into the spin-up analyses in the revised manuscript. This now allows readers to see what changes and/or improvements can be expected from this setting.

Additionally, we treated the following points carefully, which we believe will further improve the manuscript:

- We have added a discussion of the Incremental Analysis Update (IAU) method as a potential alternative to our current initialization procedure. We have also highlighted the need for further research on this topic in the outlook section of the conclusions.
- We have also recomputed all speed-up calculations using a much smaller reference domain, addressing the key comments from Reviewers #1 and #2. This new reference domain is minimal rather than all-encompassing, which reduces the reported speed-up values by a factor of four. In addition, we introduced an unsegmented tube as another reference case.

## Major points

### Initialization of the high-resolution segment-based runs

The initial conditions (IC) for segment  $k$  are generated by merging the base run data with the output data from segment  $k - 1$ . Section 3.5 examines the spin-up of several thermodynamic parameters resulting from that procedure during the first few hours of model integration. Spin-up effects are known to occur, if the driving model climate differs from that of the target model, or if the model climate changes significantly with grid resolution. Apart from spin-up effects, the proposed initialisation procedure may generate a significant amount of spurious sound and gravity waves ('noise') which might degrade the quality of the solution. However, the manuscript is lacking a quantitative analysis of the noise level.

We thank the reviewer for drawing attention to the important distinction between spurious sound and gravity waves, which are numerically generated artifacts, and the broader transient adjustment process following re-initialization. In response, we have rephrased the relevant sentence in the manuscript to explicitly read: "the merged ICs can excite spurious sound and gravity waves, and re-initialization effects occur at the beginning of a simulation in a new segment." Furthermore, we have

replaced the term “spin-up effects” with “re-initialization effects” throughout the manuscript wherever it refers to the adjustment following segment transitions in the high-resolution runs, reserving “spin-up” exclusively for the initial adjustment period of the base run.

As a quantitative measure of this noise, I recommend looking at time series of the domain-averaged surface pressure tendency (see the ICON model tutorial Section 2.2 for a description). Such time series can be extracted from the ICON log files. Specific questions:

- How does the initial noise level of the high-resolution runs compare to that of your base run? To make a fair comparison you might need to repeat the base run at the resolution of your coarsest segment, and to restrict the analysis to the area covered by the segment. However, a direct comparison of the existing runs may already be sufficient.

Unfortunately, we set the message level for production runs to the default value, which means we cannot extract temporally high-resolution domain-averaged surface pressure tendency from the ICON log files for either the base run or the high-resolution simulations. To improve the spin-up analysis, an aspect raised by both you and the other reviewers, we reran experimental simulations of the hurricane-centric workflow with only a single domain (R2B11). As shown in the next response, an equilibrium level for the domain-averaged surface pressure tendency is reached within a short time, so we consider a comparison with the base run no longer necessary.

We would also like to emphasize that the base run and the high-resolution segment runs are based on fundamentally different parameterization settings: NWP with partial convection parameterization versus LEM without convection but with 3D turbulence. This means that not only the spatial resolutions differ, but also the representation of physical processes considered in the simulations. Therefore, a direct comparison of the two simulations would convolve both changes, which complicates the interpretation of the results. Furthermore, we question whether a base run at high resolution is even meaningful, since the parameterization settings would not match the resolution. We also note that substantial computational resources would be required to conduct a high-resolution base run, which would undermine the purpose of efficiency gains achieved through segmentation. We have therefore concluded that conducting a base run equivalent at higher resolution for a direct comparison of the two simulation data is not productive.

- Does a reinitialisation interval of 12h or 24h provide sufficient time for the initial noise to decay? In other words, is the timeseries of the surface pressure tendency a flat curve by the end of the reinitialisation interval, or does it still slope? If it still slopes, your reinitialisation procedure may accumulate noise over successive segment runs, as your IC merging procedure will transfer spurious waves from one segment run to the next.

In the figures 1–3, we present the time series of the domain-averaged surface pressure tendency for the high-resolution segment-based runs. The configuration is set to medium-sized width and 12h-reinit. The production setting with LBC flag OFF (thin lines) is compared to the experimental setting with LBC flag ON (thick lines). It shows that there is always significant noise at the beginning of each segment, which decays within a few hours. The time series of the surface pressure tendency is flat by the end of the reinitialization interval, indicating that the initial noise has decayed sufficiently. This suggests that the reinitialization procedure does not

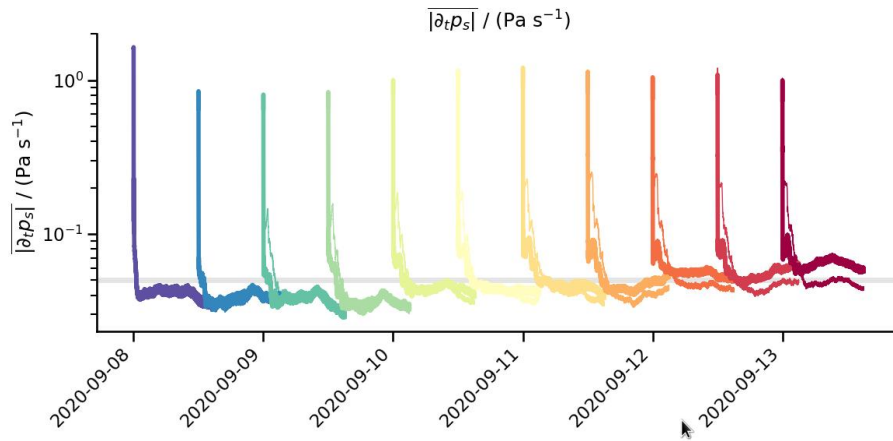

Figure 1: Full time series of the domain-averaged surface pressure tendency for the high-resolution segment-based runs. Configuration is set to medium-sized width and 12h-reinit. The production setting with LBC flag OFF (thin lines) is compared to the experimental setting with LBC flag ON (thick lines).

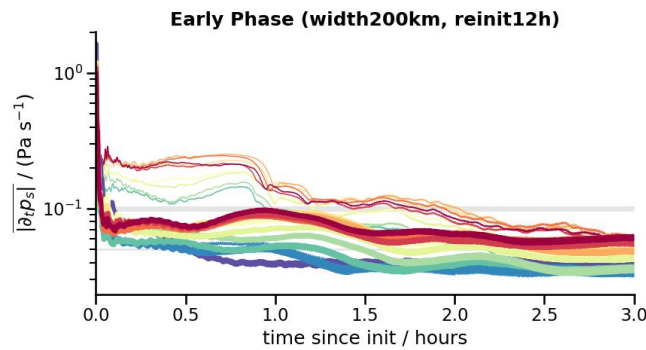

Figure 2: Early phase of the time series of the domain-averaged surface pressure tendency for the high-resolution segment-based runs. Configuration is set to medium-sized width and 12h-reinit. The production setting with LBC flag OFF (thin lines) is compared to the experimental setting with LBC flag ON (thick lines).

accumulate noise over successive segment runs.

Figure 2 shows the early phase of the time series, where the initial noise is most pronounced. It can be seen that the LBC flag has a significant impact on the noise level, with the experimental setting (LBC flag ON) showing a lower noise level than the production setting (LBC flag OFF). This suggests that the LBC flag is effective in reducing the initial noise in the high-resolution segment-based runs. This supports your recommendation to apply the LBC flag ON setting in our workflow, a recommendation we have now implemented in the revised manuscript.

Figure 3 shows the late phase of the time series, averaged over the last three hours, with error bars representing the standard deviation. The results indicate that LBC flag ON setting leads higher values of the domain-averaged surface pressure tendency, which suggests that the LBC flag ON setting also has some weaknesses. For this, we would derive that our production setting with LBC flag OFF still has some legitimacy and further detailed research on this topic would be beneficial. However, we would like to emphasize much more detailed work on the impact of this LBC flag is outside our current capacity and would require a dedicated study.

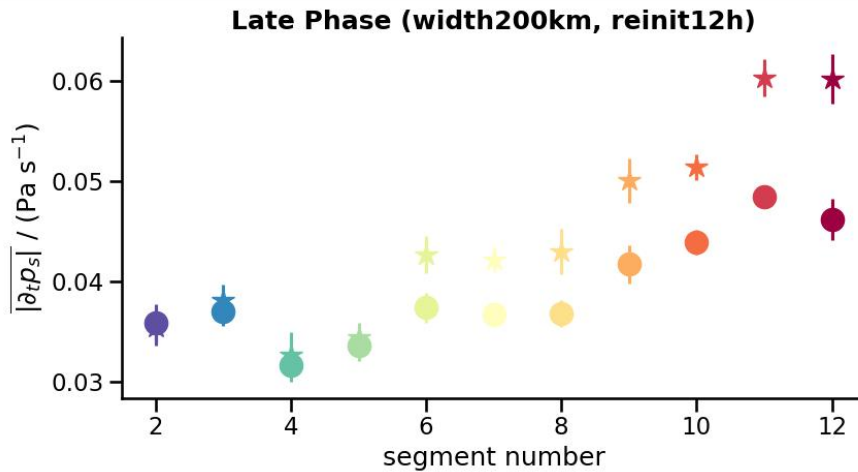

Figure 3: Late phase of the domain-averaged surface pressure tendency for the high-resolution segment-based runs averaged over the last three hours. Configuration is set to medium-sized width and 12h-reinit. The production setting with LBC flag OFF (filled circles) is compared to the experimental setting with LBC flag ON (stars). Errorbars represent the standard deviation.

### Alternative initialization procedures

Have the authors explored alternative model initialisation procedures apart from IC merging? Might the Incremental Analysis Update (IAU) procedure be applicable? IAU is an effective filtering technique for spurious high-frequency sound and gravity waves (see, for example, the ICON model tutorial Section 11.3). In ICON, it is applied operationally to add analysis increments provided by the data analysis. If you define the difference between your base run fields and the fields from segment  $k - 1$  as the increments (or vice versa), the IAU procedure might be applicable to your problem.

We have indeed not explored alternatives to IC merging and have chosen to focus on the method we described, as it is very simple and efficient and, in our view, produces acceptable side effects. However, we were very pleased with the suggestion regarding the IAU method and will investigate this approach more thoroughly in future work.

For us, it is of paramount importance that the fields within the Lagrangian analysis region remain spatially and structurally consistent. Any discontinuities in these fields arising from alternative initialization methods could prevent us from tracking, for example, the eye of the hurricane or the development of deep convective clouds continuously over time. This possibly represents a significant difference compared to weather forecasting, where finding an optimal initial state is the primary objective. However, further insights can only be gained through a more detailed investigation of the IAU method in future work.

We have added a sentence to the outlook section of the conclusions to highlight that further research on this topic is needed.

### Quantitative error analysis

The manuscript lacks a quantitative analysis of the errors introduced by the segment-based approach. Ideally, the results of the segment-based approach and the classic approach (single large LAM do-

main) should be evaluated against measurements. Only then, can the question be safely answered, as to whether the efficiency gains achieved justify the acceptance of potentially greater model errors. Admittedly, this is easier said than done.

There are many factors that affect the quality of a simulation, so agreement with observations depends on numerous factors. However, we want to emphasize that we are not proposing to use our method within an operational NWP framework, where observational agreement would become of primary concern. Instead, we believe our setup is particularly suited for basic-research questions and can be used to test very high spatial resolutions and their effects before the computational resources are available to conduct comparable studies with classical approaches.

A pragmatic alternative would be to compare the results of the segment-based approach with those of the classic approach at the same horizontal and vertical resolutions. Using the results of the classic approach as a reference would allow you to evaluate differences in noise levels, deviation of the model results, and the impact of the chosen cross-track width.

We have significantly improved the analysis of errors introduced by our segmentation approach. To do this, we performed the sensitivity runs described earlier, using an overlap between two consecutive segments to more precisely characterize the behavior of the re-initialization effects. This technique is only reliable when only a short integration time has elapsed. As the simulation progresses, runs that were initially perturbed begin to diverge, and the divergence grows with time. Consequently, it quickly becomes unclear whether differences between two realizations of the same phenomenon are due to intrinsic divergence or to differences in the model settings. Our case study, the hurricane Paulette, is highly dynamic and strongly influenced by intense tropical convection. Point-wise comparisons between two realizations or difference maps are therefore inappropriate; only statistical analyses are meaningful. Robust statistics require a well-designed ensemble approach, which in turn demands a highly efficient simulation system.

Thus, as we argued earlier, a direct comparison with a single traditional limited - area domain would provide little insight, so we kindly ask to refrain from requesting such a comparison.

### **Lateral boundary conditions and external parameters**

Lateral boundary conditions (LBCs) are an integral part of the presented workflow. However, Section 2.3 'Workflow Schemes and Implementation Details' lacks a description of how LBCs and external parameter fields (e.g. topography) are treated. While the authors touch this topic in several sections of the manuscript, they provide no concise description. Specific questions:

- Are high-resolution segment-based runs at their boundaries always driven by hourly data taken from the base run, or is an additional post-processing step performed on LBCs similar to the merging step for initial conditions?

Yes, hourly LBC are always taken from the base run and no special treatment is applied. We have added a paragraph about BC and EXTPAR handling at the end of section 2.3 and removed the discussion of BC and EXTPAR handling from section 3.3.

- Do you run the Extpar tool on the individual high-resolution segment grids, or do you interpolate the coarse external parameter fields from the base run onto the segment grids? One conse-

quence of the interpolation approach is that the high-resolution runs make use of an overly smooth topography. While I am aware that the focus of your simulations is on the ocean areas, the use of coarse external parameter fields is expected to notably impact hurricane simulations during landfall. Therefore, if this constraint exists in your toolkit, I recommend stating this clearly.

Extpar tool is always run on the individual high-resolution segment grids which yields the highest possible resolution for external parameters. We have made it more clear now in the added paragraph about BC and EXTPAR handling at the end of section 2.3.

There might exist a few more shortcomings, which should be mentioned explicitly in the manuscript, if applicable:

- One possible shortcoming relates to the land and soil model. Initial condition fields containing tiled land surface information cannot be regridded to different resolutions, because the tile partitioning differs between the source and target grids. It is still possible to activate the tile approach for your segment runs, however a tile cold start will be required (i.e. initialisation from aggregated fields). The same restriction applies to the classic approach of a single large limited-area run such as your base run. However, the problem is amplified for your segment runs, as repeated initialisations are required. Hence, your segment-based approach might restrict the usage of the land and soil tile approach.

Thank you for raising this interesting aspect. We did not apply our method for simulations over land in this study, as the focus is on hurricane-centric analysis over ocean areas. However, this is an important consideration for future applications. The limitations of re-initializing the land model at multiple segment boundaries need to be studied intensively to understand how repeated tile cold starts might accumulate errors or impact the representation of land-surface processes.

We added a sentence in the outlook part of the conclusions section to highlight that further research on this topic is needed.

- Recently, the consequences of using inappropriate LBCs at the time of model initialization have gained interest within the ICON community. By 'inappropriate' I refer to LBCs that differ from the initial conditions read from the initial conditions file. In such cases, the model simulation is likely to suffer from model biases, proportional to the mismatch between the initial LBCs and the initial conditions. A detailed description of this problem is available on the ICON webpage [https://docs.icon-model.org/documentation/buildrun/buildrun\\_input\\_data.html](https://docs.icon-model.org/documentation/buildrun/buildrun_input_data.html). It is likely that your model runs are affected by this problem. The proposed solution is to overwrite the initial LBCs with the initial conditions, by activating the namelist switch `init_latbc_from_fg=TRUE`. (default FALSE). If this switch was deactivated in your model runs, I recommend repeating a subset of your runs to check whether this has any impact on the model results presented in your manuscript.

Thank you for this interesting comment. It impacted our revision activities a lot. We have conducted a sensitivity experiment with the proposed LBC flag activated and incorporated the results into the spin-up analyses in the revised manuscript. This now allows readers to see what changes and/or improvements can be expected from this setting.

Please also find more answers to your questions regarding the LBC flag in the response to your major point on the "Initialization of the high-resolution segment-based runs".

### Minor points

1. Line 44: '... and the influence of larger scale processes is not captured adequately.' I would merely argue that the influence of small- to regional-scale processes on large-scale processes is not adequately captured by design. Are the large-scale processes not accounted for by the lateral boundary conditions?

We have rephrased the sentences accordingly.

2. Optional suggestion: Line 88: '... two one-way nested domains with grid spacings of 5 and 2.5 km are employed ...' The wording 'two one-way nested domains' might be a bit confusing for readers from the ICON community. If I understand correctly, your base setup consists of a regional domain and one nested domain (one-way nested). In particular, I propose to avoid using the word 'nest' for the base domain (DOM01), and to avoid counting it as a nest. The base domain can be a global or regional domain, which may be equipped with one or more nested domains. You might consider adapting the wording in the text (e.g. L153, L157, L205, etc.).

We have adapted the wording at (former) lines 88 and 205 accordingly. These references apply to the base simulation.

For the high-resolution segment runs, we have retained the original wording, as we consider the outer domain to be effectively an offline nest relative to the base run, and thus the terminology "nested domain" remains appropriate in this context.

3. Line 119: In your example the distance of the track segments A and D in terms of time is  $\Delta t_{\text{reinit}} + 2\Delta t_{\text{add}} = 18 \text{ h}$ . However, in the text you state that it corresponds to the distance traveled by the hurricane, 'e.g. from 18 UTC the previous day to 15 UTC', which corresponds to a time interval of  $21 \text{ h} \neq 18 \text{ h}$ . Is there a typo in the text, or am I missing something?

Thank you for pointing this out. We are lucky that the reviewer noticed this inconsistency. The interval of 18 hours is indeed correct, and right starting time would be 21 UTC.

The text has been corrected to reflect this.

4. IC generation Line 159–166: This paragraph might benefit from some rephrasing, in order to point out more clearly that
  - CDO is used for horizontal regridding only (no vertical regridding)
  - vertical regridding (interpolation) is performed by the ICON test run, which reads the horizontally interpolated ICs, and outputs the vertically interpolated IC to file right before the model performs the first integration step (time step zero).

Vertical regridding is mentioned again in Section 3.3 (L275–278). I suggest to discuss it only once.

Thank you for the suggestion. We did the following changes in the manuscript:

- We have added "horizontal" to clarify that CDO is used for horizontal regridding only.

- We have removed the discussion of vertical regridding and only mention the number of vertical levels in the context of the ICON high resolution setup.
- We have added a paragraph about BC and EXTPAR handling at the end of section 2.3 and removed the discussion of BC and EXTPAR handling from section 3.3.

5. In Section 3.3 ‘Exploration of Different Refinement Strategies’ the resolution of your grid segments (DOM01) is R2B11, which is exactly twice the resolution of DOM02 of your base run (R2B10). I assume that you are not constrained to a factor 2 in resolution jump and that it is possible to select arbitrary horizontal resolutions for DOM01 of the grid segments (within physically reasonable bounds)? In particular, I assume it is equally possible to choose R3B10 or R3B11 for DOM01 of your grid segments in this example? Is my assumption correct? Your statement ‘In principle, it is also possible to start initial refinement from grids finer than the base grid’ (L256) seems to point towards this direction, but it is not fully clear to me whether there exist technical limitations in your workflow or not.

A similar question was asked by reviewer #1. We repeat our answer here:

Yes, this functionality is in principle possible. However, the current implementation misses the distinction between the grid of the base run and the grid from which refinement is performed. This means that currently the refinement is always performed from the base run grid, by halving the grid spacing. The addition of a second grid for refinement can easily be implemented and left for future extensions.

We have added a sentence in the outlook part of the conclusions section to highlight that further research on this topic is needed.

6. Figure 7b: Can you explain why the minimum surface pressure seems to undershoot when switching to the next grid segment? I would rather expect the minimum surface pressure to increase, as a consequence of regridding and weighted merging. Both, regridding and merging, will likely diffuse gradients in the prognostic fields which I expect to result in increased minimum surface pressure values.

We can only provide a speculative explanation for the surface pressure undershoots. We suspect that the undershoots are caused by the re-initialization of segments with merged initial conditions. The temporal behavior of minimum surface pressure is also detailed in Figures 10 and 11. These figures show that the undershoots occur for each subsequent segment and are present across different domain configurations. This is very likely a dynamic adjustment process in which differences between the merged initial conditions are equilibrated through the radiation of atmospheric waves.

7. Line 327: ‘... the 12h-reinit setup is significantly more favorable in terms of resource requirements ...’. Could you please explain why the 12h-reinit setup requires less computing time than the 24h-reinit setup (see Table 2)? Assuming an identical across-track width, switching from 24h to 12h will result in a domain size that is half the original size. However, the number of grid segments required will double. So, where does the observed speedup for the 12h reinitialisation interval come from?

This is likely a misunderstanding. We apologize for the confusion; the text in the manuscript may not have conveyed our intended meaning clearly. We added text to clarify this point.

Both setups, the 12h-reinit and 24h-reinit setup, do not differ in the number of time steps. They are identical for both configurations. However, because the 12h-reinit setup is always made off significantly smaller domains than the 24h-reinit setup, the computing time for the 12h-reinit setup is correspondingly smaller.

## Editorial

1. Figure 1: Gray arrows are a bit hard to see in print form.

We changed to a slightly darker gray tone for the arrows in Figure 1 to improve visibility in print form.

2. Table 1: Strictly speaking the column 'reinit' does not fit, as its content clashes with the labeling of the rows (similar for Table 2). It seems like a pragmatic approach to keep the table compact and, unfortunately, I do not have a better solution.

Thank you for this feedback. We have attempted to improve the readability of the tables by adding vertical spacing and lines. We will work with the professional typesetting team to ensure that the table design is optimized during the preparation for publication.

3. Figure 7: 'The minimum pressure ... as in (b) and (c)'. 'as in (b) and (c)' does not make sense to me. Do you mean 'as in (a)'?

Yes, thanks! We have corrected the text to read "as in (a)".

4. There is some inconsistency in the way units are defined in the figures. Axis annotations sometimes use square brackets, while at other places a slash is used followed by units that are sometimes enclosed in round brackets and sometimes not. I suggest the consistent use of one style, such as square brackets for example.

Thank you for this comment. Since only dimensionless quantities can be plotted as numbers, the physical quantity must first be divided by the corresponding unit. To follow this principle, we consistently use a slash in conjunction with the unit. We have additionally added round brackets around the unit everywhere to improve readability. We have applied this consistent formatting to all figures.

5. Line 313: 'Most of the ice produced is located northwest of the hurricane center.' Isn't most of the ice located northeast rather than northwest in Figure 9?

Thank you very much for catching this error! We have corrected the text to specify the correct direction.

# Advancing the Capabilities for Efficient Hurricane-Centric Simulations with the Atmospheric Model ICON

Fabian Senf<sup>1</sup> and Roxana Cremer<sup>1</sup>

<sup>1</sup>Leibniz Institute for Tropospheric Research, Leipzig, Germany.

**Correspondence:** Fabian Senf (senf@tropos.de)

**Abstract.** Global storm-resolving simulations with kilometer resolution are increasingly replacing traditional climate modeling approaches and show particular potential for resolving the dynamics and effects of deep moist convection. These modern modeling methods are moving toward sub-km scales, leading to extremely high energy and resource requirements. This makes iterations, parameter optimizations, and sensitivity studies no longer easily feasible. For the class of propagating, large-scale weather phenomena such as hurricanes, high-resolution limited-area approaches in combination with Lagrangian methods are therefore of interest, in which refined grids are shifted along the path of the phenomenon under consideration. To create this capacity for the ICON atmospheric model, this study develops a flexible workflow toolkit to enable efficient simulations of [hurricanes](#) on a sub-km scale. Our approach leverages the flexibility that ICON offers through the ability to create custom grids. The concept divides hurricane tracks into overlapping temporal windows of 12-24 hours and generates customized grid segments that follow the hurricane's movement. The technical implementation automates key components of the workflow, including hurricane tracking, flexible grid generation, and preparation and merging of initial conditions across successive segments. The application of the workflow is demonstrated using Hurricane Paulette (2020) as an example, for which high-resolution simulations with grid spacings down to 300 m were performed using different segment configurations. The results show that the hurricane track remains consistent with the base run and depends mainly on the across-track width of the chosen configuration, while intensity metrics such as minimum pressure and maximum wind speed show significant sensitivities to resolution in our multi-nested setups. The efficiency gains are significant compared to traditional approaches with fixed limited-area domains: [replacing a fixed domain with a track-following tube](#) reduces resource requirements by factors of 2–8, [and segmenting the tube into short, frequently re-initialized intervals adds a further factor of 2–6](#). Analysis of [re-initialization](#) effects shows systematic but manageable impacts during segment transitions. Nevertheless, the efficiency gains achieved by our method are so substantial that they justify the acceptance of the [re-initialization](#) effects. Our segment-based approach in the hurricane-centric reference system now allows for more flexible regional hurricane simulations with the ICON model and more efficient investigation of new research questions regarding the sensitivity of hurricane cloud systems at very high resolutions.

## Short Summary

Computer models for hurricane prediction are becoming increasingly detailed but require substantial computing resources. We developed a flexible approach that follows hurricanes as they move, applying high-resolution simulations only where needed. This method reduces computing costs by [up to one order of magnitude compared to conventional fixed limited-](#)

area domains, while achieving resolutions down to 300 meters. The approach enables more efficient hurricane research and improved understanding of tropical dynamics.

## 1 Introduction

30 Global storm-resolving simulations on a kilometer scale are increasingly replacing traditional climate modeling approaches (Sato et al., 2018, 2019; Segura et al., 2025). These modern modeling methods show particular potential for resolving the dynamics of deep moist convective phenomena and their various forms of spatial organization, and the resulting interactions between small and large scales in a more physically realistic manner. Global storm-resolving simulations are now constantly evolving from kilometer to hectometer resolutions, enabling unprecedented detail in the representation of atmospheric processes (Hohenegger et al., 2023; Klocke et al., 2025). However, the development and calibration of these high-resolution approaches pose significant challenges (Shukla et al., 2010). They are extremely energy- and resource-intensive in terms of both computing resources and storage requirements. As a result, iterations, parameter optimizations, and sensitivity studies can no longer be easily performed (Mauritsen et al., 2022). For this reason, alternative and efficient approaches are needed to understand how well regional to locally limited phenomena are represented at high resolutions and standard parameter settings.

40 One typical solution to this problem is to use limited-area domains with high spatial resolution that refine the global model simulations in a predefined limited area and within a certain time period, thereby significantly reducing the computing resources required. These limited-area solutions can be designed to be consistent with global simulations by using initial and boundary conditions derived from them and working with the same set of physical parameterizations. Of course, the capability of limited-area approaches is inherently somewhat constrained, since interactions with boundary conditions can introduce errors and the

45 [upscale influence of small-scale processes onto the larger scales](#) is not captured adequately. The atmospheric component of the Earth system model ICON ([ICO](#)sahedral Nonhydrostatic, see [Zängl et al., 2014](#)) already includes the possibility of simulating such regional domains with nested grid refinements (Stevens et al., 2020; Zängl et al., 2022; Hohenegger et al., 2023). These approaches are usually limited to spatially fixed domains that must be defined in advance. This concept is very well suited for spatially and temporally limited phenomena, such as the diurnal evolution of convection over land under rather calm

50 wind conditions. However, the approach with fixed regional domains is less suitable when the weather phenomena under consideration propagate over large distances, such as hurricanes, and thus the covered area is as large as entire oceans. For this class of problems, high resolution Lagrangian approaches are interesting, in which the refined grids are shifted along the path of the phenomenon under consideration. Such approaches have been successfully applied for a long time for flexible high resolution hurricane forecasts in operational settings (Kurihara et al., 1998; Gopalakrishnan et al., 2002).

55 For predicting the path of hurricanes, km-scale model approaches have been shown to reach reduced track position errors (Dong et al., 2020). For [accurate](#) simulations of the structure and intensity of hurricanes, an explicit and well-designed representation of deep moist convective processes also appears to be key (Gao et al., 2023). It has been further shown for Hurricane Katrina, that its intensification and structure of its convective bands only improved sufficiently when a spatial resolution of around 1 km is achieved (Davis et al., 2008). Systematic investigations in Davis et al. (2011) have also shown that intensity

60 biases with resolutions around 1 km are reduced, especially for very high wind speeds, compared to coarser model resolutions. The study argues that it is essential to resolve cloud structures in hurricanes, but also that significant improvements between 100 m and 1 km horizontal resolution are questionable. These examples can be continued and provide evidence that a high spatial resolution is essential for realistic hurricane simulations and that entering the sub-kilometer scale may need further investigations.

65 Together, high spatial resolution and flexible adaptation of simulation domains can help enable novel, high-quality hurricane simulations while keeping computing costs within reasonable limits. Our efficient approach presented here contributes to this goal and advances the capabilities of [ICON model](#). Redesigning the grid and data management in ICON and the associated communication patterns is so challenging, and the risks of negatively impacting the outstanding performance achieved in Klocke et al. (2025) are so high, that we have decided to implement a workflow-based approach to make regional hurricane  
70 simulations more flexible. This approach is an intermediate step on the way to a fully Lagrangian model concept and has the advantage that we can completely retain the proven and optimized communication patterns and data structures of ICON. Our approach allows us to take advantage of the flexibility that ICON offers through its ability to create user-defined grids. In this way, we can perform targeted and efficient hurricane-centric simulations down to the hectometer scale without having to re-optimize the efficiency of the underlying model. We are thus creating the possibility of using an approximate Lagrangian  
75 approach with the ICON versions available today to create innovative datasets for hurricane investigations in very high resolution. With this approach, we would like to encourage the scientific modeling community in general to give more consideration to co-design methods that promote the parallel development of sophisticated global simulation approaches and flexible and efficient regional refinements.

The paper is structured as follows: In Sect. 2, we present the methodology of our flexible refinement workflow in detail. We  
80 provide a conceptual overview together with detailed workflow diagrams and discuss the portability of our methods to different high-performance computing platforms. Sect. 3 demonstrates the application of the workflow using Hurricane Paulette (2020) as an example. Different refinement strategies are explored, and the results of high-resolution simulations are presented and discussed. There we also provide an analysis of the performance and resource requirements of our approach. Finally, Sect. 4 summarizes the key findings and outlines potential future directions for research in this area.

## 85 **2 Methodology**

### **2.1 General Overview**

Figure 1 provides a general overview of the flexible refinement workflow used to create high-resolution hurricane simulations. The various steps are carried out sequentially. The first step is to create a base simulation of a hurricane. Both global and sufficiently large regional setups can be used for this purpose. In the example case presented in Sect. 3.1, [a limited-area setup](#)  
90 [covering](#) the entire tropical Atlantic [is employed](#). Global storm-resolving simulations, such as the projections of the nextGEMS project (Segura et al., 2025), could also be used as base simulations. A wide range of data from the base simulation will be required in subsequent steps.

## Flexible Refinement Workflow

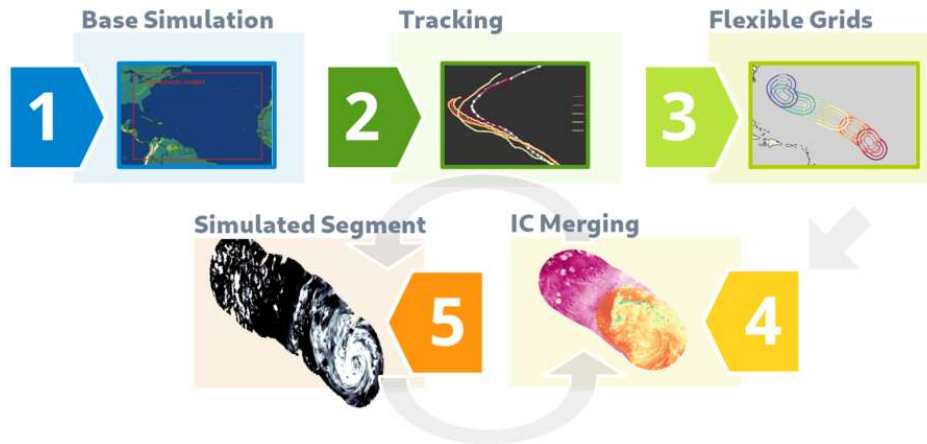

**Figure 1.** Overview of the flexible refinement workflow: Five steps are shown in different colored boxes and numbered accordingly. The steps of the workflow include (1) creating the base simulation, (2) identifying and tracking the hurricane, (3) creating the flexible grids and other necessary simulation data, (4) combining the initial conditions from the base and newly created simulation data, and (5) performing the actual high-resolution hurricane simulation. Gray arrows indicate the flow in the workflow diagram, with steps 4 and 5 being performed as iterative loop over the respective hurricane segments.

An important prerequisite is that the base simulation generates a hurricane and reproduces its characteristics sufficiently well. In the second step (see Fig. 1), the hurricane is identified in the base data and tracked over time. This tracking process  
95 creates a Lagrangian reference system, initiating the transition from a fixed domain to a flexible, hurricane-centric setup. It is important to note that we follow the hurricane as a large-scale structure which is not necessarily the same as shifting the domain according to the mean horizontal wind.

In the third step, we split apart the hurricane track into individual elements, which we refer to as "*segments*". Based on these, flexible and user-defined grids are set up that overlap so that previous information can be used for subsequent simulations. All  
100 essential data like external parameters, lateral boundary and initial conditions (ICs) are created specifically for these grids. This completes the pre-processing workflow.

Steps four and five build the production workflow. Both steps are performed alternately for each simulation segment. Step four generates the respective ICs from which the atmospheric simulation is started. For the first segment, ICs are created solely from the base simulation. Step five conducts the actual high-resolution hurricane simulations in the respective grid segment and  
105 stores the necessary ICs for the next simulation. For the second and the subsequent segments, the loop goes back to step four and data from the previous segment is reused in the overlap area for the new simulation. Where there is no overlap between two subsequent grid segments, ICs from the base simulation are taken. Thus, step four produces a mixed initial state consisting of a merge of two information sources (see Sect. 2.3 for more details).

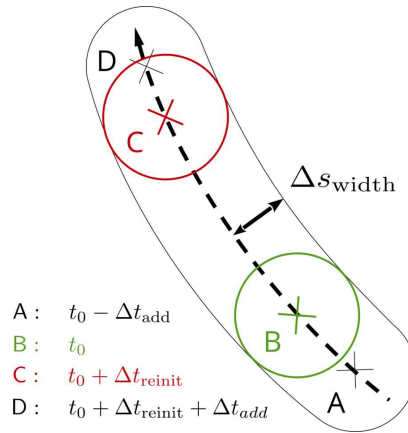

**Figure 2.** Schematic representation of a track segment. The reference track is represented by a thick, dashed black line. A grid segment with a width of  $\Delta s_{\text{width}}$  is constructed around it (thin solid black line). The spatial points A to D are determined by their temporal sequence along the track. The circles around points B and C indicate the areas of interest for analysis at the start and end time of the simulation within the segment. Points A and D show the extension of the grid segment by a predefined time  $\Delta t_{\text{add}}$ . For simplicity, only the outer nest of the track segment is shown. Further nests follow the same scheme, but lie inside the outer nest with smaller across-track widths.

## 2.2 Segment Concept

110 Our entire workflow is based on the idea of simulating a hurricane only within its vicinity along its temporal evolution. To accomplish this efficiently, we rely on a segment concept for which a reference track is divided into individual *track segments*. The length of the track segments is mainly determined by the envisioned re-initialization time interval,  $\Delta t_{\text{reinit}}$  (plus some additional buffer). Re-initialization data must be available from the base simulation for the chosen interval, e.g. 12 or 24 hours, to support the re-initialization of the higher-resolution simulations.

115 Figure 2 shows how a track segment is constructed. The points B and C correspond to the location of the hurricane center in the base simulations at times  $t_0$  and  $t_0 + \Delta t_{\text{reinit}}$ . The points A and D expand the track segment in the respective directions by a certain buffer distance to account for situations in which the hurricane moves slower or faster along its path in the higher-resolution simulations. For practical reasons, this buffer distance is also specified as a time interval,  $\Delta t_{\text{add}}$ . Combining re-initialization interval and buffer time, the selected track segment runs from point A to point D and thus covers the distance  
 120 traveled by the hurricane e.g., from 21 UTC the previous day to 15 UTC ( $\Delta t_{\text{add}} = 3$  h;  $\Delta t_{\text{reinit}} = 12$  h).

A *grid segment* refers to a track segment that has been spatially expanded horizontally. It is constructed by expanding the selected track segment by a user-defined across-track width,  $\Delta s_{\text{width}}$ , in all directions, forming a tube-like shape. Imagine a circular area with a radius of  $\Delta s_{\text{width}}$  and the center at the respective track point sweeping over the track segment. The circular section at a time  $t$  is defined later as Lagrangian analysis region for more detailed investigations (see Sect. 3.4).

125 Finally, the segment concept is applied to different start times  $t_i$  which link the  $k$ -th segment to an individual initialization time. For practical reasons, we count segments in relation to the initialization time of the reference  $t_{\text{ini}}$ . The start time of the

$k$ -th segment is thus given by  $t_k = t_{\text{ini}} + k \Delta t_{\text{reinit}}$  where  $k = 0$  selects  $t_0 = t_{\text{ini}}$ . If e.g. 24 hours of model spin-up are omitted from the reference data, the first meaningful segments can be found at  $k = 1$  for  $\Delta t_{\text{reinit}} = 24$  h and at  $k = 2$  for  $\Delta t_{\text{reinit}} = 12$  h. However, it is up to the user to define which segments are the first meaningful segments in their simulation chain.

### 130 2.3 Workflow Schemes and Implementation Details

Section 2.1 provides an introductory description of the various stages incorporated within the workflow. Specifically, steps 1 through 3 are categorized under the pre-processing workflow, while steps 4 and 5 pertain to the production workflow. The automation of tasks using algorithms exhibits varying degrees of complexity. In the following, a detailed analysis is shown that details the implementation of the most complex algorithms used throughout the workflow.

135 Figure 3 provides a comprehensive flowchart of the grid generation algorithm. The starting point is the horizontal wind field at 10 m height from the base simulation that is converted to relative horizontal vorticity  $\zeta$  and further coarse-grained with a **running-average filter with a width of around 200 km**. The coarse-grained vorticity  $\zeta_c$  field allows to identify larger-scale cyclonic motions such as those characteristic for hurricanes. Detection and tracking of cyclonic features is done with the open-source python package *tobac* (Heikenfeld et al., 2019; Sokolowsky et al., 2024). A **threshold criterion of  $\zeta_c = 10 \text{ day}^{-1}$**   
140 was used for identification, ensuring only the strongest motions were selected. Please note that a variety of other and more customized tools are available for identifying and tracking hurricanes, such as TempestExtremes (Ullrich et al., 2021) or the approaches by Kleppek et al. (2008) and Enz et al. (2023), which could have been applied here with equal justification. The preparation of the hurricane track data from base simulations is concluded by a matching algorithm. It utilizes location data of past hurricanes from HURDAT (Landsea and Franklin, 2013) to find the closest matching hurricane track in the base  
145 simulations (similar to Gutmann et al., 2018). This use of observational best-track data only provides additional insights for nudged simulations or simulations in a forecast mode, for free-running climate simulations a comparison to the observational track may not be physically meaningful.

The actual grid generation loop is entered with data from the best matching track, from a base grid (here, we take the grid from the finest reference nest) and from a configuration file that allows users to specify the along- and cross-track extend  
150 of the grid segments. The grid generation algorithm relies on DWD-ICON-Tools software (see Zängl et al., 2022, for grid-related aspects), facilitating the creation of flexible ICON grids through masks, crucial for our hurricane-centric workflow. For masking, a chosen base grid is read. Then, the track segment and its spatial extension by the across-track width,  $\Delta s_{\text{width}}$ , are transferred to this grid to create a mask. The resulting mask is then used in the DWD-ICON-Tools grid generator to create the next refinement cutting out only the chosen grid segment. This builds the outermost nest of a flexible setup and serves  
155 as the basis for further refinements. If multiple nests are targeted, the track segment is transferred again, now to the just created outermost nest, and the lateral extension is performed again with a predefined, but smaller across-track width. This process is repeated several times until all nests for the respective refinement levels have been created. In Fig. 3, the shown loop determination criteria is  $n = 3$  which means that a sequence of three nested grids with successively halved grid spacing are created. Finally, these nested grids resemble layers of an onion.

## Grid Generation

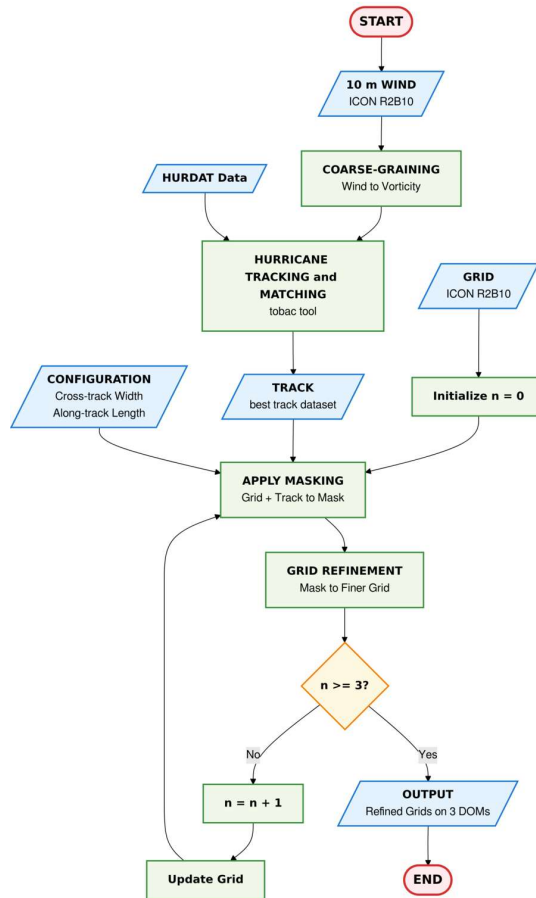

**Figure 3.** Detailed flowchart for the sequential grid generation process. Final start and end points are highlighted in red. Incoming and outgoing data are visualized as slanted blue boxes and methods that treat these data are shown as green rectangles. The index  $n$  counts the number of nested domains and thus determines the number of iterations in the grid generation loop. The term R2B10 indicates the triangular grid configuration of the ICON base run with a grid spacing of approximately 2.5 km.

160 Figures 4a and b split up the automated algorithm for IC generation into a pre-processing part and into a production part. For IC pre-processing, data from the base simulation, here noted by IC\* as well as reference grid (source) and segment grid (target) are input. The horizontal regridding uses the tool cdo (Schulzweida, 2023) together with a conservative remapping to calculate regridded IC\*. This dataset is input into a test ICON run that serves several purposes. With the test run (i) the integrity of the execution workflow is tested, (ii) performance-relevant aspects are investigated and resources for production runs are estimated and (iii) internal vertical interpolation is applied to consistently bring the regridded IC\* from the reference levels to the possibly more refined target levels. After that point, the IC pre-processing workflow stops with the decision whether the considered segment is chosen to be the initial segment or not.

165

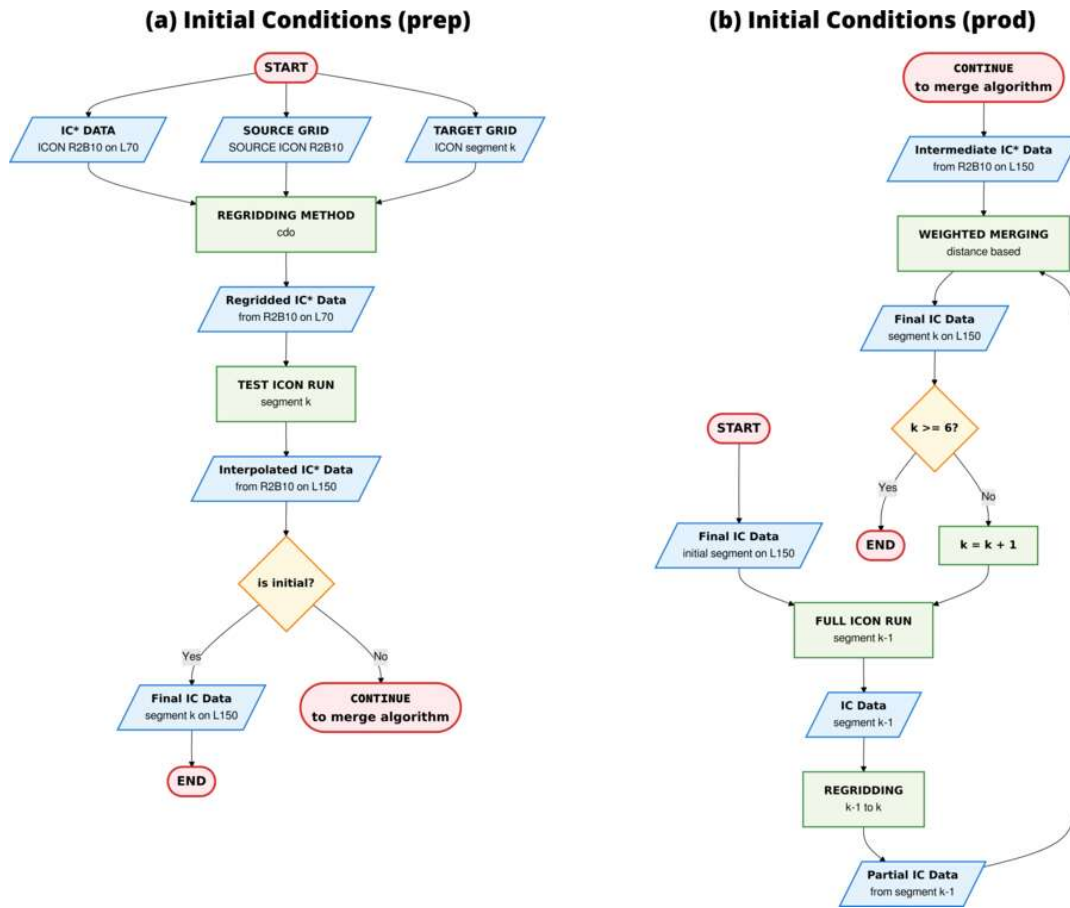

**Figure 4.** Detailed flowchart for (a) initial conditions pre-processing and (b) initial conditions production. Final and intermediate start and end points are highlighted in red. See Fig. 3 for meaning of the other elements. The index  $k$  counts the number of segments along the hurricane track. The loop terminates after a user-defined number of segments, e.g. here  $k = 6$ . The term L70 (L150) indicates the vertical grid configuration of the ICON base run with 70 (150) vertical levels.

In the IC production chain, regridDED IC\* are input into the full ICON run for the initial segment. At the end of the successful full ICON run, IC data for initializing the next segment are stored. Due to along-track shifts of the grid segments, these IC data only partially cover the region of the next segment. To compensate for this offset, a merging algorithm is applied that maps the partial IC data from segment  $k - 1$  to the grid for segment  $k$  in the overlap area. The remaining parts are filled with regridDED IC\* from the reference. The transition between the two IC data sources is smoothed by weights that decrease linearly with distance from the overlap boundary. Still, the mix of two IC datasets introduces a discontinuity in the initialization - a limitation that is discussed in depth in Sect. 3.5.

After grid and IC generation, the external parameters and boundary conditions are remapped onto the newly created grid segments. The former is directly interpolated from the original external data onto the respective grids yielding the highest

possible resolution of e.g. topography. The latter is exclusively obtained from the base run data and mapped using `cdo` on the respective lateral-boundary grids of the high-resolution simulations.

## 2.4 Portability and User Interfaces

180 The workflow toolkit is intended to run on super-computing platforms. It consists of a mix of python tools and bash scripts, the latter being submitted into a HPC scheduling system. The workflow was initially developed for the German Climate Computing Center (DKRZ) and its computing platform Levante and adjusted to its specific module environment and the Simple Linux Utility for Resource Management (SLURM) scheduler. The toolkit was then ported to the Jülich Supercomputing Center (JSC) Platform JUWELS, and its most important aspects were generalized. We therefore consider the software to be relatively  
185 platform-independent. In order to port the workflow toolkit, only the configurations of the corresponding module environment and the SLURM schedulers need to be properly set up for new platforms.

Users can readily configure the toolkit via a detailed configuration file, allowing them to set and modify parameters, as well as file and software dependencies, for different numerical experiments. We chose a TOML (Tom's Obvious, Minimal Language)-based configuration containing clearly structured elements and sections that can be easily edited with standard text  
190 editors. Additionally, we provide wrapper scripts to initiate the execution of entire workflows. It is possible, on the one hand, to start the pre-processing workflows of an entire series of consecutive grid segments. This results in the parallel execution of individual workflows that carefully handle their internal sequential dependencies. On the other hand, the production workflow wrappers can be executed. These trigger the execution of the ICON model in the selected grid segment with multiple restarts, if necessary, and merge the ICs before starting an ICON run for the next segment. All other user-relevant information can be  
195 found in the documentation of the latest software release (Senf, 2026c).

## 3 Application

### 3.1 Case Description

We now introduce a hurricane case chosen for demonstrating our flexible refinement workflow for hurricane-centric high resolution simulations. In 2020, Hurricane Paulette crossed the Atlantic and, with a total length of around 11,400 km, was one  
200 of the hurricanes with the longest track for that year. According to the National Hurricane Center's tropical cyclone report, Paulette formed as a tropical depression in the central Atlantic on September 7 and intensified into a tropical storm as it moved northwestward (National Hurricane Center, 2021). It reached category 1 hurricane status on September 13, intensified further into a category 2 hurricane in the early hours of September 14, and reached peak intensity of 90 kt ( $46 \text{ m s}^{-1}$ ) and 965 hPa around 18 UTC on September 14. A snapshot of Paulette during its most intense phase is shown in Fig. 5a. Paulette finally  
205 transitioned into an extratropical cyclone at 12 UTC on September 16. During its first seven days of formation and main intensification period, Paulette's path was relatively straight, making it an ideal use case for our workflow methods.

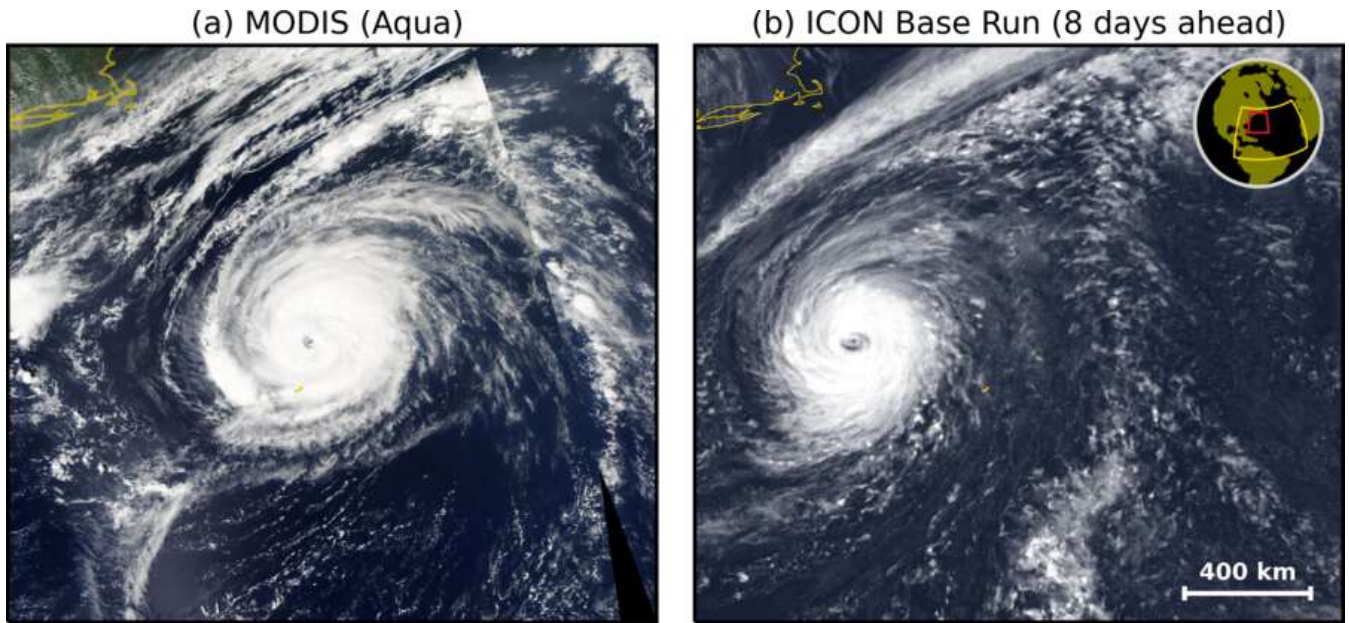

**Figure 5.** Top view of hurricane Paulette from (a) observations and (b) simulations. A regional cutout in the Atlantic ocean was defined reaching from  $-74.0$  to  $-53.4$  ° E and from  $25.0$  to  $43.2$  ° N. Subpanel (a) shows a true-colour image acquired by the Moderate Resolution Imaging Spectroradiometer (MODIS) instrument on the NOAA-AQUA satellite during an ascending orbit at overpass time on 14 September 2020, around 18:00 UTC. Subpanel (b) provides a simulation of the reflected solar radiation flux, normalized between  $100$  and  $750 \text{ W m}^{-2}$  from our ICON base run, which was initialized on 7 September 2020 at 0 UTC. The time, geographical region and projection have been matched between the observation and the simulation. The color scale and map in (b) have been adjusted to ensure visual consistency with (a). The length scale of  $400 \text{ km}$  is shown in the lower right corner of (b) and the inset in the upper right corner of (b) shows the location of the image cutout (red outline) and the inner base run domain (yellow outline) in the Atlantic ocean.

### 3.2 Base ICON Run

The ICON model solves hydrodynamic equations on a triangular grid (see Zängl et al., 2014; Dipankar et al., 2015), and can operate as a global or regional modeling system (Hohenegger et al., 2023; Müller et al., 2025). For our baseline run, we used the regional setup of the ICON model in the configuration with the numerical weather forecast (NWP) physics package (Zängl et al., 2014). The base simulations with an outer limited-area setup and grid spacings of  $5 \text{ km}$  forced by ERA5 data (Hersbach et al., 2020) were performed into which a second, inner domain with  $2.5 \text{ km}$  grid spacing was nested using one-way coupling.

For the outer nest, a spatial extent of  $9900 \times 6700 \text{ km}^2$  was chosen, which covers most of the tropical and subtropical Atlantic north of the equator. The outer nest was configured as R2B9 triangular ICON grid, corresponding to an equivalent grid spacing of  $5 \text{ km}$ . In this domain, convection processes and convective precipitation were parameterized following Bechtold et al. (2008) based on Tiedtke (1989). For the inner nest, the ICON R2B10 grid setup was chosen, corresponding to a grid spacing of approximately  $2.5 \text{ km}$ . The vertical resolution of the base run was set to 70 model levels in both nests, extending

from sea surface to a maximum height of 34 km. The inner nest is driven by the outer nest via a nudging zone close to the lateral boundary. However, due to one-way coupling, the inner nest does not provide feedback to the outer nest. In the inner  
220 nest, subgrid-scale convection was partially parameterized. The resolved model dynamics explicitly represent deep convective processes, while a parameterization approach still approximates shallow to mid-level convection. This setup has been shown to sufficiently reproduce realistic marine cloud structures and cloud radiative effects (Senf et al., 2020).

All other parameterizations from the NWP physics package were selected identically for both setups. Thus, all ICON simulations used the two-moment cloud microphysics scheme after Seifert and Beheng (2006). Subgrid-scale turbulent fluxes were  
225 calculated using a closure approach, as described by Baldauf et al. (2011), which includes the prognostic calculation of turbulent kinetic energy. The scheme ecRad was used for radiation calculations (Hogan and Bozzo, 2018). It performs radiative calculations in 14 solar and 16 terrestrial pre-defined spectral bands.

The simulations utilized in the following were initialized at 0 UTC on September 7 using the ERA5 data, a reanalysis dataset produced by European Centre for Medium-Range Weather Forecasts (ECWMF, Hersbach et al., 2020). This corresponds to a  
230 time when Paulette had already developed into a tropical depression. ERA5 data is available six-hourly as boundary data for the outer nest. For the base run, ICON version v2.6.6 is selected, which was the most recent ICON version at the time the base simulations were created. On top of this version, an update was developed that allows the sea surface temperature from ERA5 to be updated daily for all regional nests (Senf, 2026a). Therefore, SST fields are not kept constant at the initial SST values, but changed on a daily basis for our hurricane base simulations. Consequently, the actual effects of Paulette on the ocean surface  
235 are already included, which could indeed negatively impact the quality of simulating the hurricane development (Bender and Ginis, 2000). The output of the base run was configured so that data for initialization or re-initialization of higher-resolution runs is available every six hours. Furthermore, data to drive high-resolution runs via lateral boundary conditions is available at a resolution of one hour.

Figure 5b shows a visual impression of Hurricane Paulette simulated with our base run setup, at the time of the most intense  
240 hurricane period. The figure shows the reflected solar radiation at the top of the atmosphere for the inner R2B10 nest after an integration time of around eight days. For operational forecasts, Gao et al. (2023) reported a mean track error of approximately 300 km after 5 days of lead time. Here, a distance of approximately 400 km between our simulated hurricane center and the observation is achieved, which is a very positive result for a hindcast with around 8 days of lead time. Given the complexity and multiple interacting processes involved in hurricane formation, the reasonably good agreement was somewhat unexpected  
245 for the rather long forecast lead time. Although the variables being compared between the observation and simulation are not the same, making a quantitative comparison difficult, we still observe interesting differences in the morphology of the simulated hurricane compared to the observation. It appears that the spatial extent of the simulated anvil cloud associated with the hurricane is underestimated. Insufficient spatial resolution could be one reason for this discrepancy, among many others, and methods that lead to more spatially refined simulations, such as the workflow presented in this paper, would be an important  
250 step in further investigating this question of resolution dependence.

### 3.3 Exploration of Different Refinement Strategies

In the following, we will examine the refinement workflow presented in Sect. 2 in more detail for Hurricane Paulette as an example. As shown previously, the base run results reveal an intriguing hurricane development, motivating us to conduct further investigations with higher resolutions. This is exactly the starting point for the flexible refinement workflow presented in this paper. The base data is now entered into the flexible grid calculation alongside the calculated track of the simulated hurricane.

As a user, one can now choose from various important parameters. These parameters determine how many grid segments are created and their size. The first fundamental question concerns the spatial resolution. Starting with the resolution of the base run (R2B10 with 2.5 km), higher resolutions can be achieved through successive refinement. The following example uses setups with three nests, ranging from R2B11 with a grid spacing of 1.2 km to R2B13 with a grid spacing of approximately 300 m. The currently implemented workflow can handle fewer nests but would require additional software updates for using more than three nests. In principle, it is also possible to start initial refinement from grids finer than the base grid for which minor software updates would be needed.

Figure 6 shows various implementations of grid segmentations for Paulette. These implementations vary either the length of a segment along the hurricane track (white line) using the "reinit" parameter  $\Delta t_{\text{reinit}}$  or the across-track width  $\Delta s_{\text{width}}$ . The different grid segments are visualized by different colors. When  $\Delta t_{\text{reinit}} = 12$  h is selected (Fig. 6a and c), the grid segments appear shorter and more compact. However, more grid segments must be calculated sequentially to cover the same integration period. For the 12-hour re-initialization setup, it makes sense to start with segment 2 on September 8, 2020, at 0 UTC to avoid spin-up of the base run. If the integration ends after the 12th segment, as shown, the hurricane's development can be tracked for five days and 12 hours. The 24-hour re-initialization setup requires fewer segments. However, each segment covers a larger region and requires more computing power (see Figs. 6b and 6d). Each of the 24-hour setups shown starts with segment 1, and sequential integration up to segment 6 covers a period of six days.

Another important parameter determines the width of the segments across the track,  $\Delta s_{\text{width}}$ . Ideally, the width would be chosen so that the hurricane development would not be significantly influenced by the lateral domain boundaries. In practice, computational constraints are significant, so responsible scientists must select the smallest feasible domain size. Given these two requirements, it is difficult to provide definite advice and determine in advance what the optimum width would be. Two possible configurations are provided in Fig. 6. First, the innermost high-resolution nest at R2B13 is selected so that the across-track width, measured as distance between the track center and the domain edge, is 100 km. Second, a wider setup was tested in which the inner nest was extended to 200 km. Table 1 shows the extent of the two outer high-resolution nests in detail.

#### High-resolution

ICON simulations were performed in the respective grid segments using the latest available version of ICON (v2025-04-2) (ICON partnership, 2025) at the time of the study. We chose 150 vertical levels (analogous to Heinze et al., 2017; Stevens et al., 2020), extending to an altitude of 34 km. Cloud microphysics and radiation were set up similarly to the base run. However, subgrid-scale turbulence was configured with a three-dimensional Smagorinsky-type mixing scheme and convection parame-

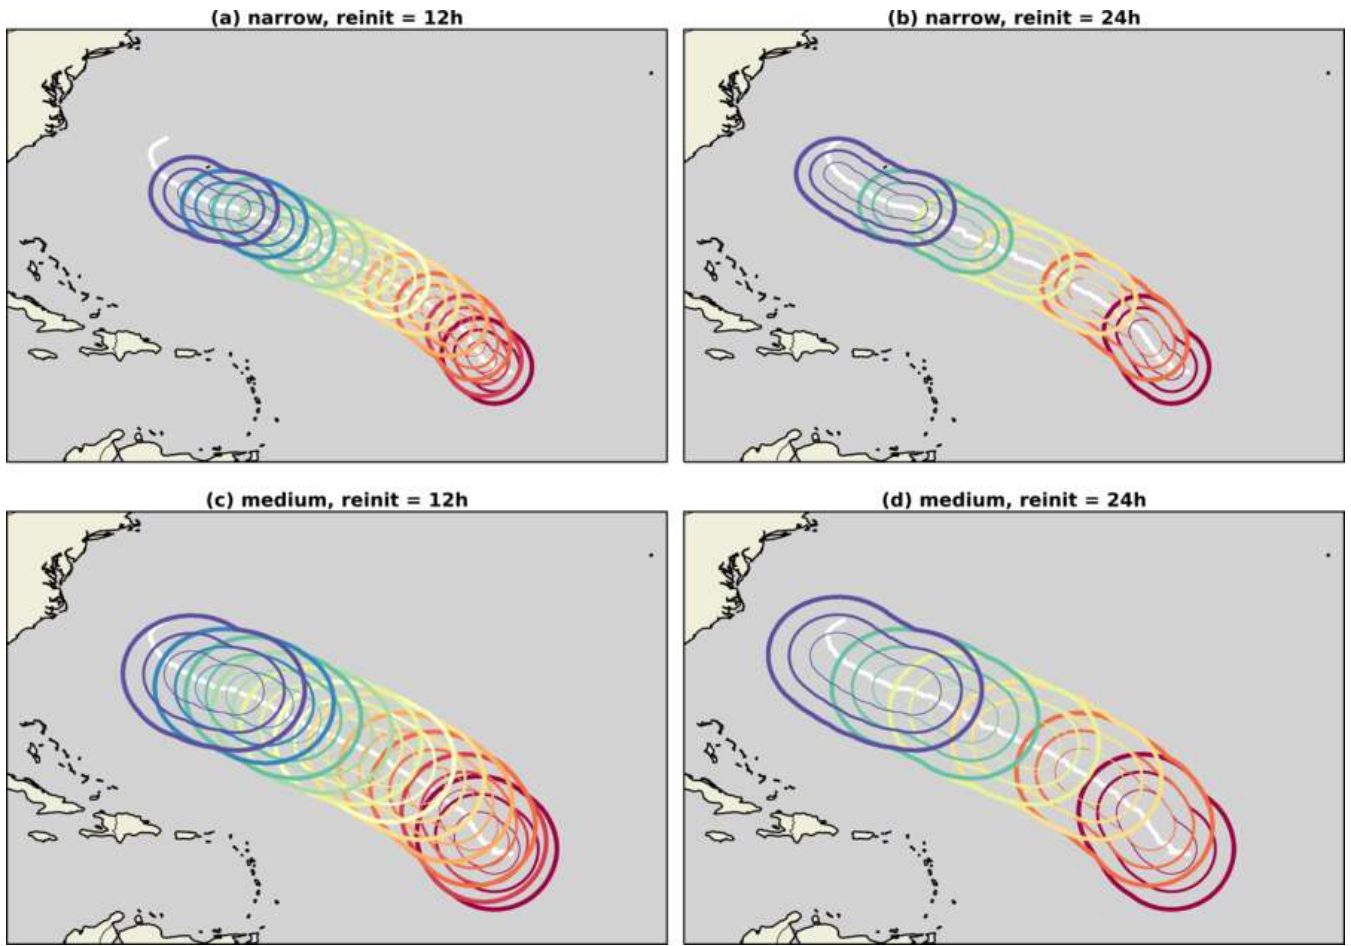

**Figure 6.** Grid segments prepared for hurricane Paulette (2020) with differently chosen re-initialization times and across-track widths. The narrow setup in (a) and (b) is compared to the medium setup in (c) and (d). Re-initialization at 12-hour intervals (a, c) leads to twice as many segments as re-initialization at 24-hour intervals (see Tab. 1). The track of the hurricane Paulette in the base simulation is plotted as a white solid line. Each segment consists of three nested domains (solid lines of decreasing thickness) colored by the initialization time, ranging from red on September 8 to blue on September 14.

285 **terization was completely deactivated** (following Stevens et al., 2020). To enable a **consistent re-initialization** of complete cloud  
microphysics, the ICON source code was modified to incorporate vertical interpolation of all microphysical moments (Senf,  
2026d). This means that graupel mixing ratios and ice crystal number concentrations, for example, are available as fields when  
the high-resolution simulations begin and when they are re-initialized. **Consequently, all cloud variables are available without  
discontinuities and abrupt changes throughout the entire simulation period.** These initial fields are made available for all nests  
290 simultaneously, enabling a seamless continuation of the simulations when switching from one segment to the next.

**Table 1.** Comparison of grid and compute requirement parameters across re-initialization configurations and domains (DOM) listed in the different columns. The computational units (cu) refer to the product of the number of time steps and the number of horizontal grid cells and is a measure of the size of a limited area experiment.

| property              | reinit   | narrow |       |       | medium |       |       | large | x-large |
|-----------------------|----------|--------|-------|-------|--------|-------|-------|-------|---------|
|                       |          | DOM01  | DOM02 | DOM03 | DOM01  | DOM02 | DOM03 | DOM01 | DOM01   |
| grid                  | 12h /24h | R2B11  | R2B12 | R2B13 | R2B11  | R2B12 | R2B13 | R2B11 | R2B11   |
| eq. resolution / m    | 12h /24h | 1200   | 600   | 300   | 1200   | 600   | 300   | 1200  | 1200    |
| width / km            | 12h /24h | 300    | 200   | 100   | 500    | 350   | 200   | 750   | 1000    |
| ave. # cells / $10^6$ | 12h      | 0.35   | 0.76  | 1.2   | 0.79   | 1.8   | 3.1   | -     | -       |
|                       | 24h      | 0.46   | 1.1   | 1.8   | 0.96   | 2.3   | 4.2   | 1.8   | 3       |
| cu / $10^9$           | 12h      | 25     | 110   | 350   | 57     | 250   | 880   | -     | -       |
|                       | 24h      | 33     | 150   | 510   | 69     | 330   | 1200  | 130   | 210     |

Figure 7 shows examples of the results of two high-resolution ICON configurations with different grid segmentation. The narrow-size setup is compared with the medium-size setup, both of which have a 12-hour re-initialization period. The position of the simulated hurricane pressure minimum in the high-resolution run remains close to the reference track of the base run. There are no significant differences in minimum position for different simulation resolutions, but same grid configuration. However, as expected, the track of the wider setup deviates more strongly from the reference track. This is plausible because the position of the hurricane center in the wider setup is not as strongly constrained by the forcing at the lateral boundaries. The intensity of the simulated hurricane, as shown by the development of the pressure minimum in Fig. 7b and the maximum 10-meter wind speed in Fig. 7c, clearly depends on the resolution. This is evident from the greater spread of the curves (esp. in Fig. 7b), which is as large as that induced by different grid configurations. Better resolved convective activity generates particularly high gustiness of the 10 m wind, which explains the fluctuations on the very short time scales in Fig. 7c. However, a more detailed investigation of the resolution effects and their causes and consequences must be postponed to a follow-up study.

### 3.4 Prototyping Lagrangian Analysis

The grid remains static during the simulation of a grid segment, and the output is only available for statically defined grids. Output variables are written directly to the ICON grid. Additionally, variables can be internally interpolated in ICON to a regular longitude-latitude grid and then output on this grid. This allows variables to be stored on slightly coarser grids at a higher temporal frequency. Our workflow toolkit includes an option to automatically calculate suitable longitude-latitude grids for the corresponding flexible grid segments. This creates a suitable longitude-latitude grid for each grid segment on which standard analyses can easily be performed. Figure 8 shows an example of such an output, displaying 2-meter temperature,

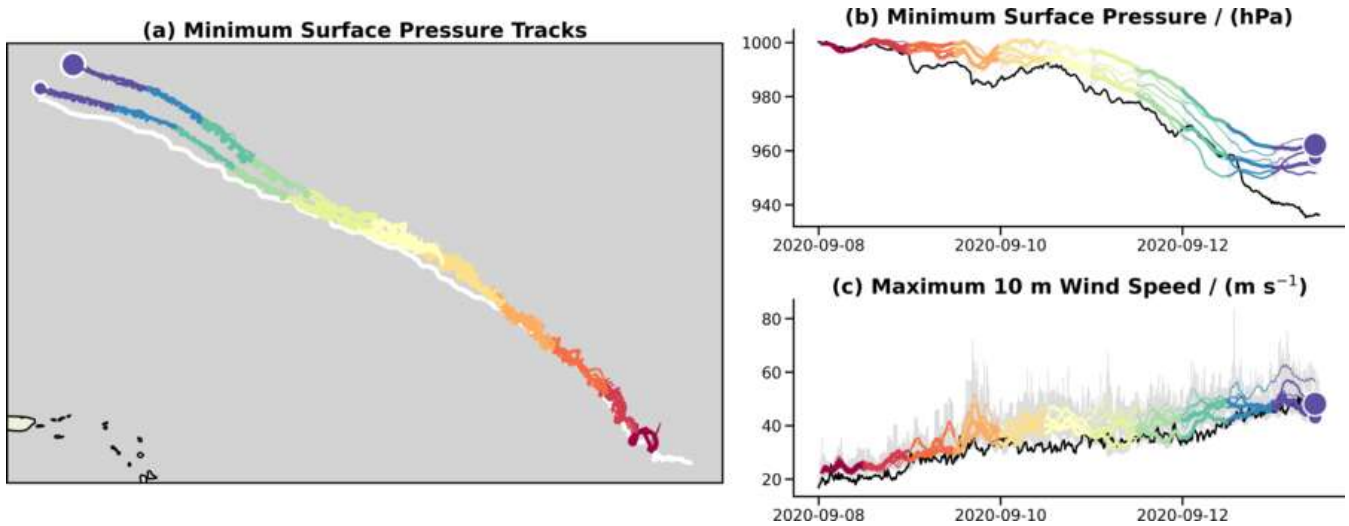

**Figure 7.** Simulated hurricane characteristics for grid configurations with differently chosen cross-track widths. (a) The minimum pressure positions are plotted on a map, with colors representing the respective grid segments. The re-initialization time between successive segments is set to 12 hours. The narrow-size setup (small, solid circle at the end of the track) is compared to the medium-size setup (larger, solid circle at the end of the track). Different resolutions are plotted with different line thicknesses, ranging from thick for R2B11 to thin for R2B13, and they partially overlap. Minimum pressure positions from the base run are plotted in white. The minimum pressure and maximum 10-m wind speed are presented using similar color and line encoding as in (a). A running-average filter is applied to the curves in (b) and (c) to reduce noise. The original data is shown in light gray shading in the background. Data from the base run is shown in black.

310 10-meter wind speed, reflected solar radiation flux at the top of the atmosphere (TOA), and total column water vapor for a given point in time. The sequence shows three nested grids for each variable, with grid spacings of 1200, 600, and 300 m. The utilization of these representations facilitates the comparison of the effects of varying resolutions on the fine structure of the simulated hurricane. However, Fig. 8 also demonstrates that important parts of the hurricane may no longer be contained within the chosen domains, especially for the finest nest of 300 m grid spacing and rather long integration times of nearly five days.

315 This illustrates the trade-offs responsible scientists must navigate between accuracy, resource requirements, and efficiency.

The visualizations on the static grid above have the typical characteristics of an Eulerian analysis, in which the reference points do not change over time. However, our hurricane-centric simulations make it possible to change the perspective by defining only the circle that moves over the reference track as the analysis area (see segment concept in Sect. 2.2). This transformation into a Lagrangian reference system results in a smooth and consistent composition of the hurricane development

320 despite the inherent discontinuity because of the separate grid segments. For example, the evolution of ice water path (IWP) is shown in Fig. 9. Most of the ice produced is located northeast of the hurricane center. The Lagrangian analysis region is highlighted in color. The remaining parts of the segment, which are not used here, are shown in light colors. Interestingly, the Lagrangian approach results in a continuous and smooth path of the IWP. It gives the impression that the grid segments are

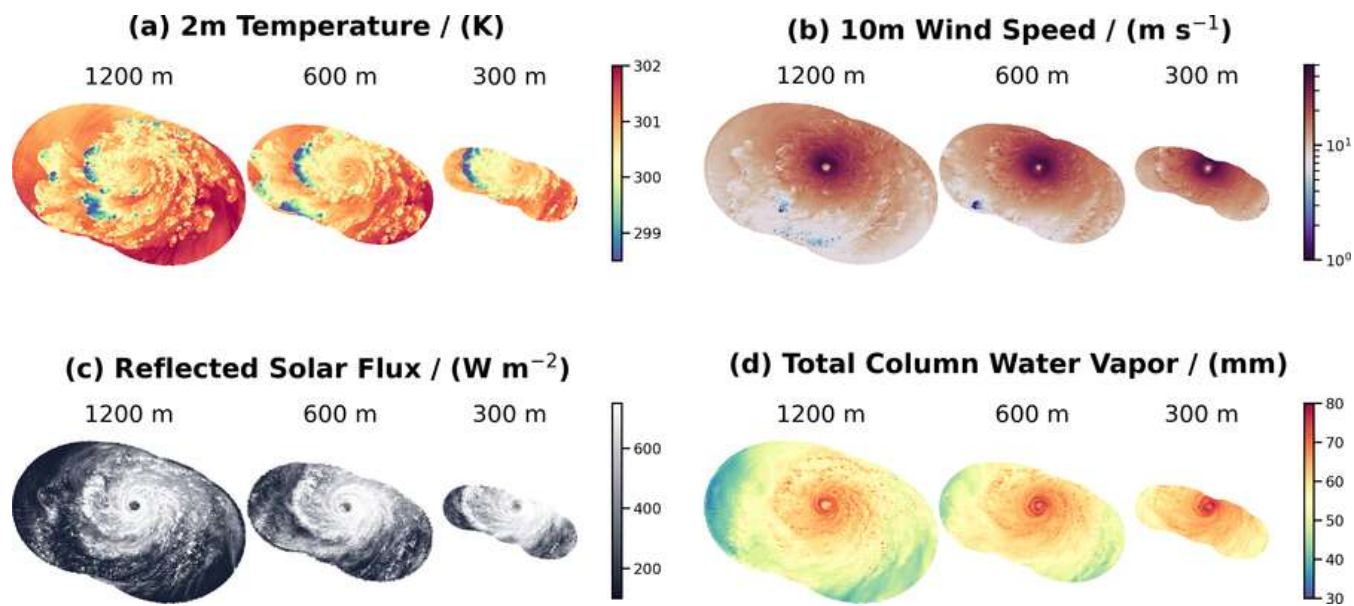

**Figure 8.** An overview of various variables, shown in the respective nests for a specific grid segment. The grid configuration was chosen so that the re-initialization time is 12 hours and the nests have an across-track width of 300, 200, and 100 km, respectively (narrow-size setup). The equivalent grid spacing is indicated above the respective nest. Variables shown are (a) 2 m temperature, (b) 10 m wind speed, (c) reflected solar radiation flux at TOA and (d) total column water vapor for segment 11 at 18 UTC on 12 September 2020.

sliding across the Lagrangian analysis area. Thus, data from different segments can be assembled to create a hurricane-centric  
 325 analysis that consistently covers several days of hurricane development on a hectometer scale.

### 3.5 Performance and Shortcomings

The following discussion will cover the advantages and disadvantages of the method described so far. One significant advantage  
 is that the target areas of the simulations are relatively small compared to the total region affected by the hurricane. This means  
 that an acceptable number of calculation steps is being performed. Table 2 summarizes computational units (cu) as a measure  
 330 of computational effort. Here, one cu refers to 1,000 time steps of fast physics (dynamical core is sub-stepped by a factor of 5),  
 which are used to integrate one million horizontal grid cells forward. For the narrow-size case, cu increases from 480 to 700  
 when transitioning from the 12h-reinit setup to the 24h-reinit setup, which corresponds to an increase of approximately 45%.  
 For the medium-size case, 1,190 and 1,610 cu are required respectively, representing a factor of between 2.3 and 2.4 more  
 335 resources than the narrow-size case, showing an increase of 35% between 12h-reinit and 24h-reinit [just because of the larger  
 domain size of the 24h-reinit segments](#). Therefore, the 12h-reinit setup is significantly more favorable in terms of resource  
 requirements, and doubling the width of the setup also leads to approximately a doubling of resource requirements. The costs  
 for expanding the setup to large and extra-large sizes are also shown. However, when comparing the numbers, it should be

### Ice Water Path / ( $\text{g m}^{-2}$ ) at 1200 m Resolution

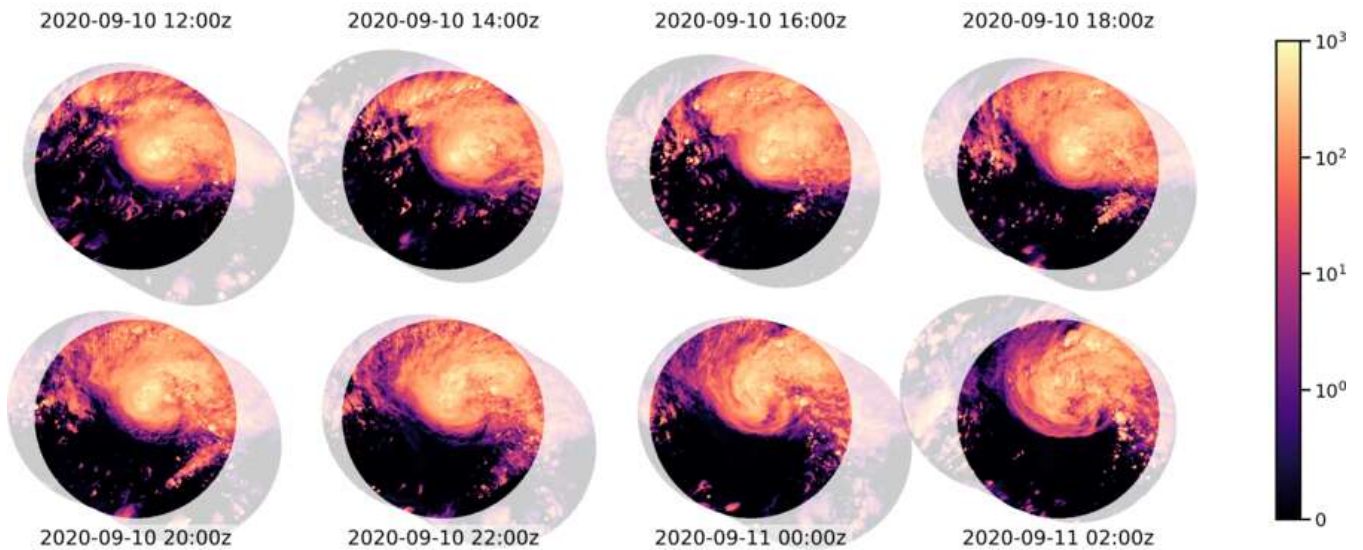

**Figure 9.** Ice water path is shown as a sequence in a Lagrangian framework. The boldly shaded areas highlight the circular Lagrangian analysis region that follows the track of the reference hurricane. The remaining parts of the respective grid segments are indicated by very light colors. Two-hour steps are made in the temporal sequence. Transitions between segments are visible between the first and second images, as well as between the second-to-last and last images, appearing as shifts in the domain boundaries. Within the Lagrangian analysis region, however, the ice water path evolves smoothly and continuously. Here, the medium-size grid configuration was chosen so that the shown nest (DOM01, 1.2 km grid spacing) has 500 km across-track width with re-initialization time of 12 hours.

noted that only the outermost nest with a grid spacing of 1.2 km was considered for the larger setups and that the complete setup consisting of three respectively refined nests requires 20 to 25 times more resources.

340 To assess how the savings of our method compare to classic regional, limited-area applications, two reference configurations are introduced in Tab. 2. The first is a tube-like setup that extends over the full hurricane track over the entire simulation period without splitting it into shorter segments. Such a tube shares the same cross-track geometry and nesting structure as our hurricane-centric segments, but is integrated as a single contiguous domain without re-initialization. The resource requirements for the tube, listed under the “6days” re-initialization interval, amount to approximately 2,640 and 5,440 cu for the narrow and medium three-nest configurations and 320 and 470 cu for the single-domain large and x-large setups, respectively. The second reference, labeled “classic” in Tab. 2, represents a conventional fixed limited-area domain and is constructed as the smallest regular longitude-latitude bounding box that fully encloses the tube geometry for the respective cross-track width. For the single-domain case at 1.2 km grid spacing, the classic limited-area approach amounts to approximately 800 cu; a three-nest configuration requires around 20,000 cu. Compared to this classic reference, the tube configurations already yield notable

345 speedup factors of 7.6, 3.7, 2.5, and 1.7 for the narrow, medium, large, and x-large setups, respectively. Dividing the tube into short, frequently re-initialized segments adds a further factor of approximately 2 to 6, depending on the chosen across-

350

track width and re-initialization interval. Together, the segment configurations with frequent re-initialization achieve the largest speedups: factors of up to 42 and 17 for the narrow and medium three-nest setups with 12-hour re-initialization intervals, and up to 6.2 and 3.8 for the single-domain large and x-large setups with 24-hour re-initialization intervals (see Tab. 2). Considering the risk of model errors or suboptimal settings requiring reruns of high-resolution simulations, the use of our flexible workflow appears well justified.

**Table 2.** Comparison of compute requirement and compute cost parameters across re-initialization configurations and domain sizes. The reinit row "6days" indicates a nested tube configurations with effectively no re-initialisations. The term "classic" refers to a potential, fixed domain configuration such that a corresponding tube configuration could be accommodated. Single domain configurations are marked by \*, all other domain configurations consist of three online coupled nests. The computational units (cu) refer to the product of physics timesteps and number of horizontal grid cells. The number of nodes and node hours refers to DKRZ Levante nodes with 128 cores for the 12h-reinit setup and to JSC JUWELS nodes with 48 cores for the 24h-reinit setup.

| property                          | reinit | narrow          | medium          | large             | x-large           | classic      |
|-----------------------------------|--------|-----------------|-----------------|-------------------|-------------------|--------------|
| <b>total cu</b> / $10^9$          | 12h    | 480             | 1 190           | -                 | -                 | -            |
|                                   | 24h    | 700             | 1 610           | 130*              | 210*              | -            |
|                                   | 6days  | 2 640           | 5 440           | 320*              | 470*              | -            |
|                                   | -      | -               | -               | -                 | -                 | 800*, 20 000 |
| <b>potential speedup</b>          | -      | <b>7.6 - 42</b> | <b>3.7 - 17</b> | <b>2.5 - 6.2*</b> | <b>1.7 - 3.8*</b> | 1            |
| <b>total node hours (# nodes)</b> | 12h    | 2 900 (64)      | 6 300 (64)      | -                 | -                 | -            |
|                                   | 24h    | 13 600 (192)    | 32 800 (288)    | 3 100* (64)       | 4 400* (64)       | -            |
| <b>total core hours</b> / $10^6$  | 12h    | 0.37            | 0.81            | -                 | -                 | -            |
|                                   | 24h    | 0.65            | 1.57            | 0.15*             | 0.21*             | -            |

In addition to the hypothetical requirements, Tab. 2 also shows the actual costs of executing the respective setups. The 12h-reinit setup was calculated on the DKRZ Levante platform using an ICON build created with the Intel compiler without the thread-based parallelization via OpenMP. Production runs were performed on 64 nodes, generating costs of 2,900 and 6,300 node-hours for the narrow- and medium-size cases, respectively. This increase in costs by a factor of 2.2 roughly corresponds to the calculated increase in demand. The 24-hour reinit setup was calculated on the JSC JUWELS platform, which has fewer computing units than Levante, with 48 cores per node compared to 128. An ICON build was created and used on JUWELS with GCC, as well as without OpenMP. The narrow-size setup was calculated on JUWELS with 192 nodes, generating costs of 13,600 node-hours. The medium-size setup was calculated with 288 nodes and generated costs of 32,800 node-hours. Comparing the core hours values between Levante and JUWELS reveals that execution on JUWELS is 20–40 % less efficient. This difference is probably due to the different compilers and their respective optimization settings, rather than hardware differences.

The immense increases in efficiency of our hurricane-centric setup however come at a price. Due to the limited size of the regional setups, the hurricane under consideration cannot develop completely freely and always remains influenced by the forcing at the lateral boundaries, which is stronger for a more narrow setup. In addition, the re-initialization procedure during the transition between segments introduces further challenges. The mix of ICs detailed in Section 2.3, which consist of different data sources inside and outside the overlap region of two subsequent segments, creates a discontinuity. This is smoothed out in the transition using a distance-weighted average. Despite this, the merged ICs can excite spurious sound and gravity waves, and re-initialization effects occur at the beginning of a simulation in a new segment. The following section evaluates the impact of these effects on simulation quality.

### 3.6 Analysis of Re-initialization Effects

To investigate the re-initialization behavior in a controlled manner, we conducted sensitivity experiments following the same grid configurations as listed in Table 1, but with the runtime of each segment extended by three hours. This creates a three-hour temporal overlap between consecutive segments, enabling a direct comparison of the atmospheric state from two successive segments at the same point in time and thus providing a pathway for directly quantifying re-initialization effects. To keep the analysis tractable, all sensitivity experiments were performed exclusively for the outermost nest (DOM01) at 1.2 km grid spacing. In addition, two parameter settings are compared throughout: the production setting with `init_latbc_from_fg=.FALSE.` (labeled "LBC flag OFF") and an updated setting with `init_latbc_from_fg=.TRUE.` (labeled "LBC flag ON"). The latter has been recommended by the ICON community since early 2026 to reduce model biases arising from mismatches between the initial lateral boundary conditions and the initial model state (see ICON Documentation, 2026).

In the following, we analyze the time series of thermodynamic and water-related atmospheric parameters for the first three hours in Fig. 10. There, the median values in the circular Lagrangian analysis regions (see Sect. 3.4) of selected surface and cloud variables are presented. For each variable, the instantaneous difference between segment  $k$  and the corresponding values from segment  $k - 1$  extended by 3 h is shown, allowing a direct quantification of re-initialization-induced deviations between consecutive segments. The figure was created for the medium-size, 12h-reinit DOM01 setup with 1.2 km grid spacing (see Tab. 1). Light gray curves show the individual segment differences, and the thick solid (dashed) black curve gives their mean for the LBC flag OFF (ON) setting. The surface pressure in Fig. 10a shows a negative anomaly with peak values around -1.2 hPa after about 30 min of integration time for the LBC flag OFF setting. An opposing positive but slightly weaker anomaly of around 0.9 hPa is visible for the LBC flag ON setting, with the peak shifted to around 70 min. Both differences appear to have converged after approximately 2 hours, by which point they have decayed to near-zero values. The 2-m temperature curve in Fig. 10b also shows a systematic negative peak of around -0.06 K at 30 min for LBC flag OFF, and a positive peak of around 0.05 K at 75 min for LBC flag ON. Temperature differences likewise vanish after approximately 2 hours. The curves for 2-m specific humidity show positive differences for both LBC flag settings, with peak values of  $0.07 \text{ g kg}^{-1}$  at 45 min for LBC flag OFF and  $0.05 \text{ g kg}^{-1}$  at 120 min for LBC flag ON. The specific humidity difference for the LBC flag ON setting converges more slowly than for LBC flag OFF, with near-zero values not yet reached by 3 hours. The individual curves for total column water vapor (TCWV), liquid and ice water path (LWP, IWP) in Figs. 10d-f show considerable variability over

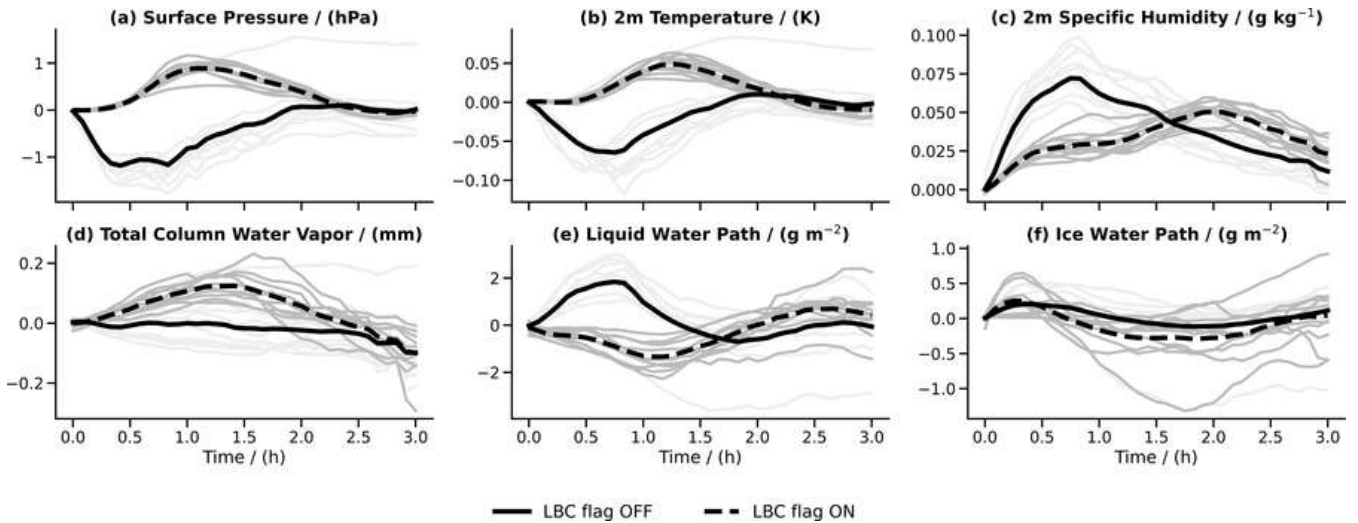

**Figure 10.** Temporal evolution of median values of surface and integrated cloud variables evaluated in the circular Lagrangian analysis region. The curves show the instantaneous difference between values from segment  $k$  and the corresponding values from segment  $k - 1$  extended by 3 hours, for (a) surface pressure, (b) 2 m temperature, (c) 2 m specific humidity, (d) total column water vapor, (e) liquid water path, and (f) ice water path. Results are shown for the medium setup with 12h-reinit. Gray curves show the evolution for individual segments, while the thick black curve shows the mean across all segments. Two parameter settings are compared: the experiment with the LBC flag deactivated (`init_latbc_from_fg=.FALSE.`), thin light gray and solid black lines) and the experiment with the LBC flag activated (`init_latbc_from_fg=.TRUE.`), thin gray and dashed black lines).

the three-hour window. The LBC flag ON setting tends to produce slightly larger mean peak values for TCWV and IWP, and smaller ones for LWP, and its peak consistently occurs later than for LBC flag OFF. Overall, the LBC flag ON setting tends to produce smaller peak differences for surface pressure and near-surface temperature, suggesting it may be the preferable choice for future applications, though its re-initialization effects appear to persist somewhat longer legitimating our choice of the LBC flag OFF setting for the production runs in this study.

Figure 11 provides a comprehensive statistical comparison of re-initialization effects across different configurations. As in Fig. 10, the analysis evaluates percentiles from segment  $k$ , here taken 30 minutes after initialization, and segment  $k - 1$  extended correspondingly. Nine percentiles (10–90% in 10% steps) of each field are computed across the Lagrangian analysis region separately, and their differences are taken. These per-segment differences are visualized as stacked histograms, with color coding by segment to enable direct comparison between setups.

The statistical results reveal distinct patterns for different atmospheric variables. Re-initialization effects are particularly visible when the values in the distributions significantly deviate from zero. For surface pressure, this pattern is clearly evident in Figs. 11a and 11e for the narrow setup. Surface pressure values scatter between -1 and -2 hPa. Comparing the effects of re-initialization time shows that longer intervals lead to slightly larger re-initialization effects in surface pressure (comparing Figs. 11a,e for narrow setup and Figs. 11i,m for medium setup). Domain size also influences these effects: larger domains

(Figs. 11q,u) show considerably less deviation from zero at 30 minutes, indicating that systematic re-initialization effects are less pronounced for larger domains. For temperature, similar effects are clearly visible. The value appear to be distributed to slightly lower magnitudes for the 12h-reinit setup than for the 24h-reinit setup. For large and x-large setups, temperature anomalies scatter around zero for all segments. Cloud variables such as LWP and IWP show significant spread in the narrow setup (Figs. 11c,d,g,h). As domain size increases, this variability decreases, likely due to more robust spatial statistics. The considerable variability in cloud variables masks potential re-initialization effects. Overall, while our hurricane-centric workflow introduces uncertainties through re-initialization effects, these remain sufficiently small and are outweighed by the substantial efficiency gains achieved.

## 425 4 Conclusions

This study presents a flexible workflow for the atmospheric model ICON that enables efficient high-resolution simulations in a hurricane-centric reference framework through a segment-based grid and pre-processing approach. The methodology demonstrates the general feasibility of conducting hectometer-resolution simulations of large, organized atmospheric phenomena like hurricanes in the tropics. Instead of investing in fixed and spatially extended regional domains throughout the entire simulation period, our flexible method follows the motion of a hurricane and generates tailored grid segments.

The technical implementation successfully automates key components of the workflow, including hurricane tracking, flexible grid generation, and initial condition preparation and merging across consecutive segments. The segment concept, which divides hurricane tracks into overlapping temporal windows of 12-24 hours, provides a practical framework for efficient utilization of computational resources. The workflow toolkit demonstrates portability across different HPC platforms, having been successfully deployed on both DKRZ Levante and JSC JUWELS systems with appropriate platform-specific configurations.

The application of the workflow is demonstrated for Hurricane Paulette (2020). High-resolution simulations with grid spacings down to 300 m were performed using different segment configurations. Variations in re-initialization intervals of 12h and 24h are explored that determine the respective along-track lengths of the segments. Additionally, different overall domain sizes are investigated by varying the across-track widths with tested configurations being rather narrow, medium-sized, large and extra large. The results indicate that the hurricane track remains consistent with the base run and mainly depend on the across-track size of the chosen configuration, while intensity metrics such as minimum pressure and maximum wind speed exhibit sensitivity to resolution in our multi-nested setups. A Lagrangian framework enables a hurricane-centric view, facilitating continuous analysis of variables like liquid and ice water path across the segmented simulations.

The increase in computational efficiency is substantial compared to traditional fixed-domain approaches. A track-following tube geometry alone reduces resource requirements by factors of 1.7–7.6 relative to an appropriately chosen longitude-latitude bounding box around the hurricane. Segmenting the tube into short, frequently re-initialized intervals adds a further factor of 2–6, yielding total speedups of up to 42 for the narrowest three-nest configuration. The setup with 12-hour re-initialization intervals proves to be more efficient than 24-hour intervals, requiring 35-45 % fewer computational resources while maintaining comparable simulation quality. Domain size scaling shows predictable resource scaling, with the twice as large medium-width

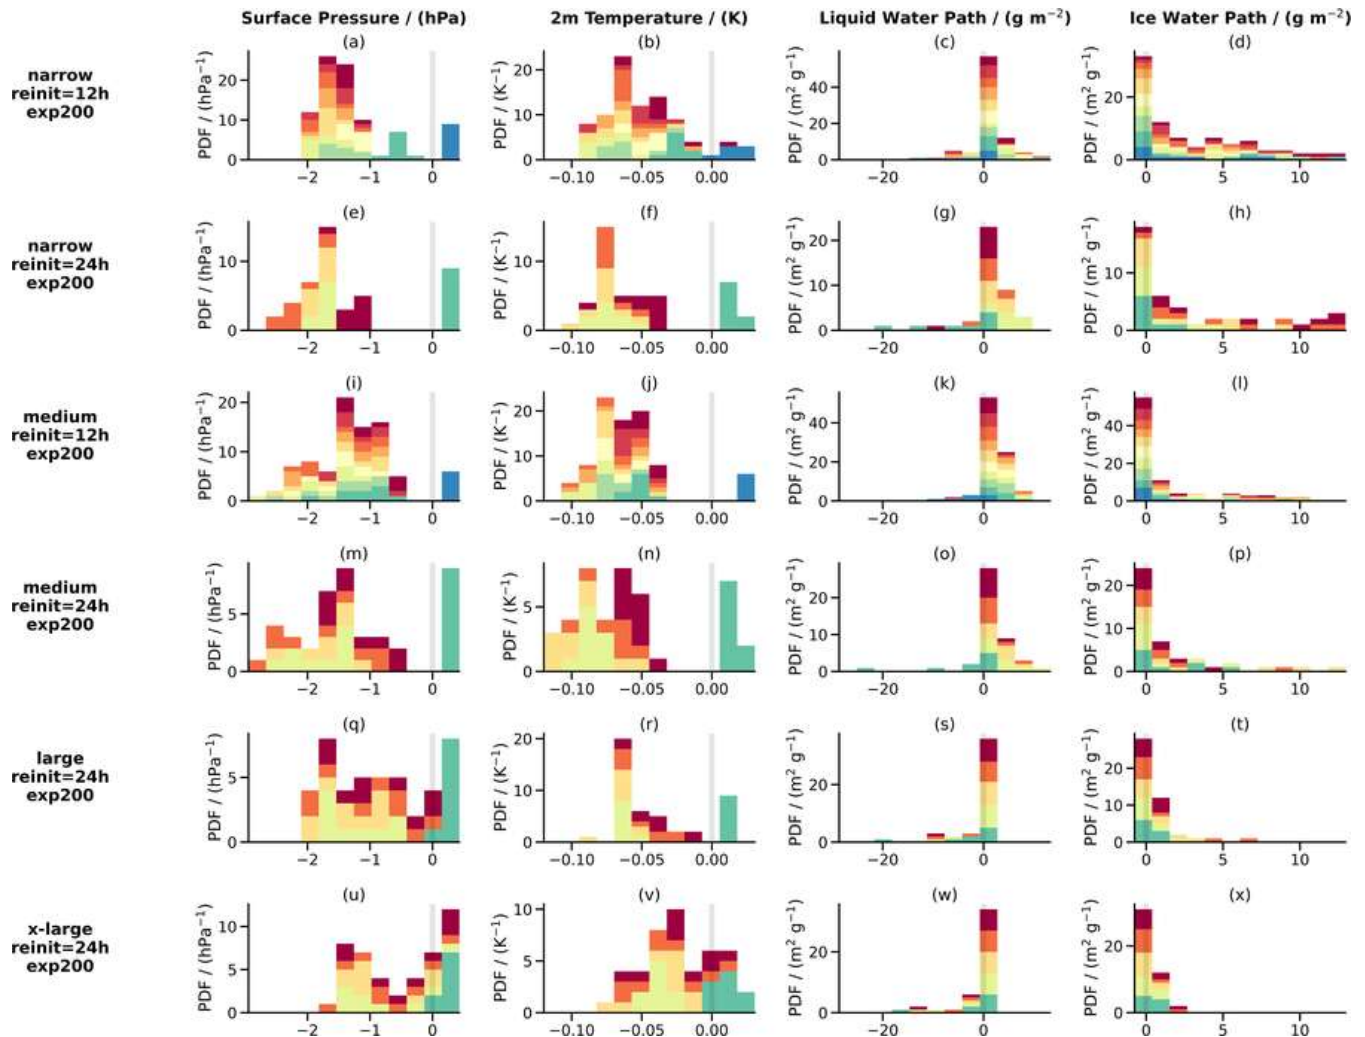

**Figure 11.** Statistical summary of potential re-initialization effects plotted as colored bars stacked on top of each other for each segment. The color coding is the same as in Fig. 6. At 30 minutes after initialization of segment  $k$ , nine percentiles (10–90% in 10% steps) of each field are computed across the Lagrangian analysis region separately for segment  $k$  and segment  $k - 1$  extended by 3 h, and their pairwise differences are taken. These per-segment differences are statistically summarized as probability density functions. The six rows show the respective setups, with the narrow and medium setups shown for re-initialization periods of 12 h and 24 h, respectively. The columns show surface pressure, 2 m temperature, liquid water path, and ice water path. The re-initialization analyses are only shown for the outer nest with a grid spacing of approximately 1 km.

450 configurations requiring approximately 2.3 times the resources of narrow configurations. However, the approach has notable limitations when the across-track width is set too narrowly, the domain may fail to encompass the entire phenomenon, a shortcoming that becomes especially evident for our narrow-size configurations. The analysis of re-initialization effects reveals

systematic but manageable impacts during segment transitions, with surface pressure showing negative anomalies on the order of 1 hPa that decay within 2 hours after re-initialization. The re-initialization effects are more pronounced in narrower domain configurations but remain sufficiently small to justify the substantial computational efficiency gains achieved by the hurricane-centric approach.

Several promising directions for methodological enhancement emerge from this work. On the technical side, extending the workflow to support more than three nesting levels would provide greater refinement flexibility and enable even finer resolution simulations. Similarly, offering greater flexibility in selecting the grid from which the refinement cycle is initiated (currently the grid of the base run) would allow for more diverse and independent nesting hierarchies. A further interesting area for development lies in improving the re-initialization procedure itself. Currently, the distance-weighted blending approach, while effective, could potentially be enhanced by integrating techniques from data assimilation, such as the Incremental Analysis Update (IAU) method available in the numerical weather prediction configuration of the ICON model. This approach might have the potential to substantially reduce spurious artifacts arising from the merging of initial conditions between consecutive segments. Additionally, future work could also investigate how the method performs over land, where re-initialization of subgrid-scale heterogeneities in land surface properties can be challenging and may introduce additional difficulties. Importantly, all such technical improvements must maintain spatial and structural consistency of simulated core variables across segment transitions such that Lagrangian analyses remain continuous and meaningful.

Beyond technical refinements, the computational efficiency gains achieved here enable new scientific applications. The method now makes high-resolution hectometer-scale simulations of additional hurricanes computationally feasible, opening opportunities for detailed dynamical analysis and process studies of a broader range of tropical storms. The reduced computational cost further enables simulation ensembles to be conducted in scientific studies, providing higher confidence in identifying systematic effects. Particularly noteworthy is the potential for perturbed parameter ensembles that would deepen our understanding of how model parameterizations influence the representation of convective organization, eyewall structure, and other small-scale phenomena in tropical cyclones. These applications demonstrate how advances in efficient simulation frameworks can open new avenues for investigating the cloud physics and dynamics of extreme atmospheric phenomena.

*Code and data availability.* The current version of the hurricane-centric workflow toolkit is available under <https://doi.org/10.5281/zenodo.18271898> (Senf, 2026c). It depends on cdo (see Schulzweida, 2023), the DWD ICON tools available at [https://gitlab.dkrz.de/dwd-sw/dwd\\_icon\\_tools](https://gitlab.dkrz.de/dwd-sw/dwd_icon_tools) (last accessed 27 January 2026, restricted access) and the extpar utility available at <https://github.com/C2SM/extpar> (last accessed 27 January 2026, toolkit tested with version v5.13). ICON open source release v2025.04 is published at <https://doi.org/10.35089/wdccc/iconrelease2025.04> and a patch to enable consistent re-initialization of complete cloud microphysics is available under <https://doi.org/10.5281/zenodo.18387047> (Senf, 2026d). ICON model v2.6.6 has restricted access and a patch to enable variable SSTs in a multiple nest setup is available under <https://doi.org/10.5281/zenodo.18385022> (Senf, 2026a). Initial, boundary and grid data from the base run used to run the hurricane-centric workflow are available under [https://www.wdc-climate.de/ui/entry?acronym=DKRZ\\_LTA\\_1376\\_dsg0001](https://www.wdc-climate.de/ui/entry?acronym=DKRZ_LTA_1376_dsg0001) (Senf, 2025). Plots and analysis were created mainly using Jupyter notebooks available under <https://doi.org/10.5281/zenodo.19002039> (Senf, 2026b).

*Author contributions.* FS lead the development of the workflow and the drafting of the manuscript. RC contributed to the writing of the manuscript and the interpretation of the results.

*Competing interests.* The authors declare that they have no conflict of interest.

*Acknowledgements.* The development was supported by the IFCES2 project funded by BMFTR (formerly known as BMBF - Federal Ministry of Education and Research) under grant number 16ME0689K as part of the SCALEXA funding initiative, which in turn was funded by the European Union - NextGenerationEU. Fabian Senf acknowledges funding from the CleanCloud project (grant: 101137639). We would like to thank Manoel Römmel for his comments and help with the workflow development. We are particularly grateful to Bernd Heinold, Ina Tegen, Jason Müller, Jan Kretzschmar, [Nadja Omanovic](#), and [two anonymous reviewers](#) whose valuable comments contributed significantly to improving the manuscript. We also thank the ICON consortium for their continuous support and engagement in pushing ICON development to the next level. We gratefully acknowledge the computing time and storage resources granted on the supercomputer JUWELS at Jülich Supercomputing Centre (JSC) under project IFCES2-SCALEXA and on the supercomputer Levante at the German Climate Computing Centre (DKRZ) under project bb1376.

We would like to mention the use of DeepL to improve the grammatical and language quality of the manuscript and the use of github copilot for AI-assisted coding and debugging of the workflow toolkit.

## 500 References

- Baldauf, M., Seifert, A., Förstner, J., Majewski, D., Raschendorfer, M., and Reinhardt, T.: Operational Convective-Scale Numerical Weather Prediction with the COSMO Model: Description and Sensitivities, *Mon. Wea. Rev.*, 139, 3887–3905, <https://doi.org/10.1175/mwr-d-10-05013.1>, 2011.
- Bechtold, P., Köhler, M., Jung, T., Doblas-Reyes, F., Leutbecher, M., Rodwell, M. J., Vitart, F., and Balsamo, G.: Advances in simulating atmospheric variability with the ECMWF model: From synoptic to decadal time-scales, *Q. J. R. Meteorolog. Soc.*, 134, 1337–1351, <https://doi.org/10.1002/qj.289>, 2008.
- Bender, M. A. and Ginis, I.: Real-Case Simulations of Hurricane–Ocean Interaction Using A High-Resolution Coupled Model: Effects on Hurricane Intensity, *Mon. Weather Rev.*, 128, 917 – 946, [https://doi.org/10.1175/1520-0493\(2000\)128<0917:RCSOHO>2.0.CO;2](https://doi.org/10.1175/1520-0493(2000)128<0917:RCSOHO>2.0.CO;2), 2000.
- Davis, C., Wang, W., Chen, S. S., Chen, Y., Corbosiero, K., DeMaria, M., Dudhia, J., Holland, G., Klemp, J., Michalakes, J., Reeves, H., Rotunno, R., Snyder, C., and Xiao, Q.: Prediction of Landfalling Hurricanes with the Advanced Hurricane WRF Model, *Mon. Weather Rev.*, 136, 1990 – 2005, <https://doi.org/10.1175/2007MWR2085.1>, 2008.
- Davis, C., Wang, W., Cavallo, S., Done, J., Dudhia, J., Fredrick, S., Michalakes, J., Caldwell, G., Engel, T., and Torn, R.: High-Resolution Hurricane Forecasts, *Comput. Sci. Eng.*, 13, 22–30, <https://doi.org/10.1109/MCSE.2010.74>, 2011.
- Dipankar, A., Stevens, B., Heinze, R., Moseley, C., Zängl, G., Giorgetta, M., and Brdar, S.: Large eddy simulation using the general circulation model ICON, *J. Adv. Model. Earth Syst.*, 7, 963–986, <https://doi.org/10.1002/2015MS000431>, 2015.
- Dong, J., Liu, B., Zhang, Z., Wang, W., Mehra, A., Hazelton, A. T., Winterbottom, H. R., Zhu, L., Wu, K., Zhang, C., Tallapragada, V., Zhang, X., Gopalakrishnan, S., and Marks, F.: The Evaluation of Real-Time Hurricane Analysis and Forecast System (HAFS) Stand-Alone Regional (SAR) Model Performance for the 2019 Atlantic Hurricane Season, *Atmosphere*, 11, <https://doi.org/10.3390/atmos11060617>, 2020.
- Enz, B. M., Engelmann, J. P., and Lohmann, U.: Use of threshold parameter variation for tropical cyclone tracking, *Geosci. Model Dev.*, 16, 5093–5112, <https://doi.org/10.5194/gmd-16-5093-2023>, 2023.
- Gao, K., Harris, L., Bender, M., Chen, J.-H., Zhou, L., and Knutson, T.: Regulating Fine-Scale Resolved Convection in High-Resolution Models for Better Hurricane Track Prediction, *Geophys. Res. Lett.*, 50, e2023GL103329, <https://doi.org/https://doi.org/10.1029/2023GL103329>, e2023GL103329 2023GL103329, 2023.
- Gopalakrishnan, S. G., Bacon, D. P., Ahmad, N. N., Boybeyi, Z., Dunn, T. J., Hall, M. S., Jin, Y., Lee, P. C. S., Mays, D. E., Madala, R. V., Sarma, A., Turner, M. D., and Wait, T. R.: An Operational Multiscale Hurricane Forecasting System, *Mon. Weather Rev.*, 130, 1830 – 1847, [https://doi.org/10.1175/1520-0493\(2002\)130<1830:AOMHFS>2.0.CO;2](https://doi.org/10.1175/1520-0493(2002)130<1830:AOMHFS>2.0.CO;2), 2002.
- Gutmann, E. D., Rasmussen, R. M., Liu, C., Ikeda, K., Bruyere, C. L., Done, J. M., Garrè, L., Friis-Hansen, P., and Veldore, V.: Changes in Hurricanes from a 13-Yr Convection-Permitting Pseudo–Global Warming Simulation, *J. Climate*, 31, 3643 – 3657, <https://doi.org/10.1175/JCLI-D-17-0391.1>, 2018.
- Heikenfeld, M., Marinescu, P. J., Christensen, M., Watson-Parris, D., Senf, F., van den Heever, S. C., and Stier, P.: tobac 1.2: towards a flexible framework for tracking and analysis of clouds in diverse datasets, *Geosci. Model Dev.*, 12, 4551–4570, <https://doi.org/10.5194/gmd-12-4551-2019>, 2019.
- Heinze, R., Dipankar, A., Henken, C. C., Moseley, C., Sourdeval, O., Trömel, S., Xie, X., Adamidis, P., Ament, F., Baars, H., Barthlott, C., Behrendt, A., Blahak, U., Bley, S., Brdar, S., Brueck, M., Crewell, S., Deneke, H., Girolamo, P. D., Evaristo, R., Fischer, J., Frank, C., Friederichs, P., Göcke, T., Gorges, K., Hande, L., Hanke, M., Hansen, A., Hege, H.-C., Hoose, C., Jahns, T., Kalthoff, N., Klocke,

- D., Kneifel, S., Knippertz, P., Kuhn, A., van Laar, T., Macke, A., Maurer, V., Mayer, B., Meyer, C. I., Muppa, S. K., Neggers, R. A. J., Orlandi, E., Pantillon, F., Pospichal, B., Röber, N., Scheck, L., Seifert, A., Seifert, P., Senf, F., Siligam, P., Simmer, C., Steinke, S., Stevens, B., Wapler, K., Weniger, M., Wulfmeyer, V., Zängl, G., Zhang, D., and Quaas, J.: Large-eddy simulations over Germany using ICON: a comprehensive evaluation, *Quart. J. Roy. Meteor. Soc.*, 143, 69–100, <https://doi.org/10.1002/qj.2947>, 2017.
- 540 Hersbach, H., Bell, B., Berrisford, P., Hirahara, S., Horányi, A., Muñoz-Sabater, J., Nicolas, J., Peubey, C., Radu, R., Schepers, D., Simmons, A., Soci, C., Abdalla, S., Abellan, X., Balsamo, G., Bechtold, P., Biavati, G., Bidlot, J., Bonavita, M., De Chiara, G., Dahlgren, P., Dee, D., Diamantakis, M., Dragani, R., Flemming, J., Forbes, R., Fuentes, M., Geer, A., Haimberger, L., Healy, S., Hogan, R. J., Hólm, E., Janisková, M., Keeley, S., Laloyaux, P., Lopez, P., Lupu, C., Radnoti, G., de Rosnay, P., Rozum, I., Vamborg, F., Villaume, S., and Thépaut, J.-N.: The ERA5 global reanalysis, *Q. J. R. Meteorolog. Soc.*, 146, 1999–2049, <https://doi.org/https://doi.org/10.1002/qj.3803>, 2020.
- 545 Hogan, R. J. and Bozzo, A.: A Flexible and Efficient Radiation Scheme for the ECMWF Model, *J. Adv. Model. Earth Syst.*, 10, 1990–2008, <https://doi.org/https://doi.org/10.1029/2018MS001364>, 2018.
- Hohenegger, C., Korn, P., Linardakis, L., Redler, R., Schnur, R., Adamidis, P., Bao, J., Bastin, S., Behraves, M., Bergemann, M., Biercamp, J., Bockelmann, H., Brokopf, R., Brüggemann, N., Casaroli, L., Chegini, F., Datsis, G., Esch, M., George, G., Giorgetta, M., Gutjahr, O., Haak, H., Hanke, M., Ilyina, T., Jahns, T., Jungclaus, J., Kern, M., Klocke, D., Kluft, L., Kölling, T., Kornblüeh, L., Kosukhin, S., Kroll, C., Lee, J., Mauritsen, T., Mehlmann, C., Mieslinger, T., Naumann, A. K., Paccini, L., Peinado, A., Praturi, D. S., Putrasahan, D., Rast, S., Riddick, T., Roeber, N., Schmidt, H., Schulzweida, U., Schütte, F., Segura, H., Shevchenko, R., Singh, V., Specht, M., Stephan, C. C., von Storch, J.-S., Vogel, R., Wengel, C., Winkler, M., Ziemann, F., Marotzke, J., and Stevens, B.: ICON-Sapphire: simulating the components of the Earth system and their interactions at kilometer and subkilometer scales, *Geosci. Model Dev.*, 16, 779–811, <https://doi.org/10.5194/gmd-16-779-2023>, 2023.
- 555 ICON Documentation: Build and Run: Input Data — Lateral Boundary Conditions, [https://docs.icon-model.org/documentation/buildrun/buildrun\\_input\\_data.html](https://docs.icon-model.org/documentation/buildrun/buildrun_input_data.html), last accessed: 1 July 2026, 2026.
- ICON partnership: ICON release 2025.04, <https://doi.org/10.35089/wdcc/iconrelease2025.04>, dWD; MPI-M; DKRZ; KIT; C2SM, 2025.
- Kleppenk, S., Muccione, V., Raible, C. C., Bresch, D. N., Koellner-Heck, P., and Stocker, T. F.: Tropical cyclones in ERA-40: A detection and tracking method, *Geophys. Res. Lett.*, 35, <https://doi.org/https://doi.org/10.1029/2008GL033880>, 2008.
- 560 Klocke, D., Frauen, C., Engels, J. F., Alexeev, D., Redler, R., Schnur, R., Haak, H., Kornblüeh, L., Brüggemann, N., Chegini, F., Römmel, M., Hoffmann, L., Griessbach, S., Bode, M., Coles, J., Gila, M., Sawyer, W., Calotiu, A., Budanaz, Y., Mazumder, P., Copik, M., Weber, B., Herten, A., Bockelmann, H., Hoefler, T., Hohenegger, C., and Stevens, B.: Computing the Full Earth System at 1km Resolution, in: *Proceedings of the International Conference for High Performance Computing, Networking, Storage and Analysis, SC '25*, p. 125–136, Association for Computing Machinery, New York, NY, USA, ISBN 9798400714665, <https://doi.org/10.1145/3712285.3771789>, 2025.
- Kurihara, Y., Tuleya, R. E., and Bender, M. A.: The GFDL Hurricane Prediction System and Its Performance in the 1995 Hurricane Season, *Mon. Weather Rev.*, 126, 1306 – 1322, [https://doi.org/10.1175/1520-0493\(1998\)126<1306:TGHPSA>2.0.CO;2](https://doi.org/10.1175/1520-0493(1998)126<1306:TGHPSA>2.0.CO;2), 1998.
- Landsea, C. W. and Franklin, J. L.: Atlantic Hurricane Database Uncertainty and Presentation of a New Database Format, *Mon. Weather Rev.*, 141, 3576 – 3592, <https://doi.org/10.1175/MWR-D-12-00254.1>, 2013.
- 570 Mauritsen, T., Redler, R., Esch, M., Stevens, B., Hohenegger, C., Klocke, D., Brokopf, R., Haak, H., Linardakis, L., Röber, N., et al.: Early development and tuning of a global coupled cloud resolving model, and its fast response to increasing CO<sub>2</sub>, *Tellus Series A: Dynamic Meteorology and Oceanography*, 74, 346–363, <https://doi.org/https://doi.org/10.16993/tellusa.54>, 2022.
- Müller, W. A., Früh, B., Korn, P., Potthast, R., Baehr, J., Bettens, J.-M., Bölöni, G., Brienen, S., Fröhlich, K., Helmert, J., Jungclaus, J., Köhler, M., Lorenz, S., Schneidereit, A., Schnur, R., Schulz, J.-P., Schlemmer, L., Sgoff, C., Pham, T. V., Pohlmann, H., Vogel, B., Vogel, H.,

- 575 Wirth, R., Zaehle, S., Zängl, G., Stevens, B., and Marotzke, J.: ICON: Toward Vertically Integrated Model Configurations for Numerical Weather Prediction, Climate Predictions, and Projections, *Bull. Am. Meteorol. Soc.*, 106, E1017 – E1031, <https://doi.org/10.1175/BAMS-D-24-0042.1>, 2025.
- National Hurricane Center: Tropical Cyclone Report: Hurricane Paulette (AL172020), Tech. rep., National Hurricane Center, Miami, FL, USA, [https://www.nhc.noaa.gov/data/tcr/AL172020\\_Paulette.pdf](https://www.nhc.noaa.gov/data/tcr/AL172020_Paulette.pdf), last access: 5 February 2026, 2021.
- 580 Satoh, M., Noda, A. T., Seiki, T., Chen, Y.-W., Kodama, C., Yamada, Y., Kuba, N., and Sato, Y.: Toward reduction of the uncertainties in climate sensitivity due to cloud processes using a global non-hydrostatic atmospheric model, *Prog. Earth Planet. Sci.*, 5, 67, <https://doi.org/10.1186/s40645-018-0226-1>, 2018.
- Satoh, M., Stevens, B., Judt, F., Khairoutdinov, M., Lin, S.-J., Putman, W. M., and Düben, P.: Global Cloud-Resolving Models, *Curr. Clim. Change Rep.*, <https://doi.org/10.1007/s40641-019-00131-0>, 2019.
- 585 Schulzweida, U.: CDO User Guide, <https://doi.org/10.5281/zenodo.10020800>, 2023.
- Segura, H., Pedruzo-Bagazgoitia, X., Weiss, P., Müller, S. K., Rackow, T., Lee, J., Dolores-Tesillos, E., Benedict, I., Aengenheyster, M., Aguridan, R., Arduini, G., Baker, A. J., Bao, J., Bastin, S., Baulenas, E., Becker, T., Beyer, S., Bockelmann, H., Brüggemann, N., Brunner, L., Cheedela, S. K., Das, S., Denissen, J., Dragaud, I., Dziekan, P., Ekblom, M., Engels, J. F., Esch, M., Forbes, R., Frauen, C., Freischem, L., García-Maroto, D., Geier, P., Gierz, P., González-Cervera, A., Grayson, K., Griffith, M., Gutjahr, O., Haak, H., Hadade, I., Haslehner, K., ul Hasson, S., Hegewald, J., Kluff, L., Koldunov, A., Koldunov, N., Kölling, T., Koseki, S., Kosukhin, S., Kousal, J., Kuma, P., Kumar, A. U., Li, R., Maury, N., Meindl, M., Milinski, S., Mogensen, K., Niraula, B., Nowak, J., Praturi, D. S., Proske, U., Putrasahan, D., Redler, R., Santuy, D., Sármany, D., Schnur, R., Scholz, P., Sidorenko, D., Spät, D., Sützl, B., Takasuka, D., Tompkins, A., Uribe, A., Valentini, M., Veerman, M., Voigt, A., Warnau, S., Wachsmann, F., Waclawczyk, M., Wedi, N., Wieners, K.-H., Wille, J., Winkler, M., Wu, Y., Ziemen, F., Zimmermann, J., Bender, F. A.-M., Bojovic, D., Bony, S., Bordoni, S., Brehmer, P., Dengler, M., Dutra, E., Faye, S., Fischer, E., van Heerwaarden, C., Hohenegger, C., Järvinen, H., Jochum, M., Jung, T., Jungclaus, J. H., Keenlyside, N. S., Klocke, D., Konow, H., Klose, M., Malinowski, S., Martius, O., Mauritsen, T., Mellado, J. P., Mieslinger, T., Mohino, E., Pawłowska, H., Peters-von Gehlen, K., Sarré, A., Sobhani, P., Stier, P., Tuppi, L., Vidale, P. L., Sandu, I., and Stevens, B.: nextGEMS: entering the era of kilometer-scale Earth system modeling, *Geosci. Model Dev.*, 18, 7735–7761, <https://doi.org/10.5194/gmd-18-7735-2025>, 2025.
- Seifert, A. and Beheng, K. D.: A two-moment cloud microphysics parameterization for mixed-phase clouds. Part 1: Model description, *Meteor. Atmos. Phys.*, 92, 45–66, <https://doi.org/https://doi.org/10.1007/s00703-005-0112-4>, 2006.
- 600 Senf, F.: Data for Nested Hurricane-Centric ICON Runs for Hurricane Paulette (2020), [https://www.wdc-climate.de/ui/entry?acronym=DKRZ\\_LTA\\_1376\\_dsg0001](https://www.wdc-climate.de/ui/entry?acronym=DKRZ_LTA_1376_dsg0001), 2025.
- Senf, F.: ICON v2.6.6 Patch: for flexible SSTs in nested domains, <https://doi.org/10.5281/zenodo.18385022>, 2026a.
- Senf, F.: Jupyter Notebooks for Plotting Analysis of "Advancing Hurricane-Centric Simulations with ICON", Submission Release, <https://doi.org/10.5281/zenodo.19002039>, 2026b.
- 605 Senf, F.: Hurricane Centric Toolset Version v2026.01 - Common Initialization and Perturbation Experiment Capabilities, <https://doi.org/10.5281/zenodo.18271898>, 2026c.
- Senf, F.: ICON v2025-04-2 Patch: for handling vertical interpolation in init of two-moment cloud microphysics, <https://doi.org/10.5281/zenodo.18387047>, 2026d.
- 610 Senf, F., Voigt, A., Clerbaux, N., Hünerbein, A., and Deneke, H.: Increasing Resolution and Resolving Convection Improve the Simulation of Cloud-Radiative Effects Over the North Atlantic, *J. Geophys. Res. Atmos.*, 125, e2020JD032667, <https://doi.org/10.1029/2020JD032667>, e2020JD032667 10.1029/2020JD032667, 2020.

- Shukla, J., Palmer, T. N., Hagedorn, R., Hoskins, B., Kinter, J., Marotzke, J., Miller, M., and Slingo, J.: Toward a New Generation of World Climate Research and Computing Facilities, *Bull. Am. Meteorol. Soc.*, 91, 1407–1412, <https://doi.org/10.1175/2010BAMS2900.1>, 2010.
- 615 Sokolowsky, G. A., Freeman, S. W., Jones, W. K., Kukulies, J., Senf, F., Marinescu, P. J., Heikenfeld, M., Brunner, K. N., Bruning, E. C., Collis, S. M., Jackson, R. C., Leung, G. R., Pfeifer, N., Raut, B. A., Saleeby, S. M., Stier, P., and van den Heever, S. C.: *tobac* v1.5: introducing fast 3D tracking, splits and mergers, and other enhancements for identifying and analysing meteorological phenomena, *Geosci. Model Dev.*, 17, 5309–5330, <https://doi.org/10.5194/gmd-17-5309-2024>, 2024.
- Stevens, B., Acquistapace, C., Hansen, A., , and Coauthors incl. Senf, F.: The Added Value of Large-eddy and Storm-resolving Models for  
620 Simulating Clouds and Precipitation, *J. Meteor. Soc. Japan*, 98, 395–435, <https://doi.org/10.2151/jmsj.2020-021>, 2020.
- Tiedtke, M.: A Comprehensive Mass Flux Scheme for Cumulus Parameterization in Large-Scale Models, *Mon. Wea. Rev.*, 117, 1779–1800, [https://doi.org/10.1175/1520-0493\(1989\)117<1779:acmfsf>2.0.co;2](https://doi.org/10.1175/1520-0493(1989)117<1779:acmfsf>2.0.co;2), 1989.
- Ullrich, P. A., Zarzycki, C. M., McClenny, E. E., Pinheiro, M. C., Stansfield, A. M., and Reed, K. A.: TempestExtremes v2.1: a community framework for feature detection, tracking, and analysis in large datasets, *Geosci. Model Dev.*, 14, 5023–5048, [https://doi.org/10.5194/gmd-625 14-5023-2021](https://doi.org/10.5194/gmd-14-5023-2021), 2021.
- Zängl, G., Reinert, D., Rípodas, P., and Baldauf, M.: The ICON (ICOsahedral Non-hydrostatic) modelling framework of DWD and MPI-M: Description of the non-hydrostatic dynamical core, *Quart. J. Roy. Meteor. Soc.*, 141, 563–579, <https://doi.org/10.1002/qj.2378>, 2014.
- Zängl, G., Reinert, D., and Prill, F.: Grid refinement in ICON v2.6.4, *Geosci. Model Dev.*, 15, 7153–7176, <https://doi.org/10.5194/gmd-15-7153-2022>, 2022.

# Advancing the Capabilities for Efficient Hurricane-Centric Simulations with the Atmospheric Model ICON

Fabian Senf<sup>1</sup> and Roxana Cremer<sup>1</sup>

<sup>1</sup>Leibniz Institute for Tropospheric Research, Leipzig, Germany.

**Correspondence:** Fabian Senf (senf@tropos.de)

**Abstract.** Global storm-resolving simulations with kilometer resolution are increasingly replacing traditional climate modeling approaches and show particular potential for resolving the dynamics and effects of deep moist convection. These modern modeling methods are moving toward sub-km scales, leading to extremely high energy and resource requirements. This makes iterations, parameter optimizations, and sensitivity studies no longer easily feasible. For the class of propagating, large-scale weather phenomena such as hurricanes, high-resolution limited-area approaches in combination with Lagrangian methods are therefore of interest, in which refined grids are shifted along the path of the phenomenon under consideration. To create this capacity for the ICON atmospheric model, this study develops a flexible workflow toolkit to enable efficient simulations of ~~tropical cyclones~~ hurricanes on a sub-km scale. Our approach leverages the flexibility that ICON offers through the ability to create custom grids. The concept divides hurricane tracks into overlapping temporal windows of 12-24 hours and generates customized grid segments that follow the hurricane's movement. The technical implementation automates key components of the workflow, including hurricane tracking, flexible grid generation, and preparation and merging of initial conditions across successive segments. The application of the workflow is demonstrated using Hurricane Paulette (2020) as an example, for which high-resolution simulations with grid spacings down to 300 m were performed using different segment configurations. The results show that the hurricane track remains consistent with the base run and depends mainly on the across-track width of the chosen configuration, while intensity metrics such as minimum pressure and maximum wind speed show significant sensitivities to resolution in our multi-nested setups. The efficiency gains are significant compared to traditional approaches with fixed limited-area domains: ~~The hurricane-centric method replacing a fixed domain with a track-following tube~~ reduces resource requirements by factors of ~~13-175, depending on the area configuration~~ 2-8, and ~~segmenting the tube into short, frequently re-initialized intervals adds a further factor of 2-6~~. Analysis of ~~spin-up re-initialization~~ effects shows systematic but manageable impacts during segment transitions. Nevertheless, the efficiency gains achieved by our method are so substantial that they justify the acceptance of the ~~spin-up re-initialization~~ effects. Our segment-based approach in the hurricane-centric reference system now allows for more flexible regional hurricane simulations with the ICON model and more efficient investigation of new research questions regarding the sensitivity of hurricane cloud systems at very high resolutions.

## Short Summary

Computer models for hurricane prediction are becoming increasingly detailed but require substantial computing resources. We developed a flexible approach that follows hurricanes as they move, applying high-resolution simulations only where needed.

This method reduces computing costs by ~~factors of 13-175~~ up to one order of magnitude compared to conventional fixed limited-area domains, while achieving resolutions down to 300 meters. The approach enables more efficient hurricane research and improved understanding of tropical dynamics.

## 30 1 Introduction

Global storm-resolving simulations on a kilometer scale are increasingly replacing traditional climate modeling approaches (Satoh et al., 2018, 2019; Segura et al., 2025). These modern modeling methods show particular potential for resolving the dynamics of deep moist convective phenomena and their various forms of spatial organization, and the resulting interactions between small and large scales in a more physically realistic manner. Global storm-resolving simulations are now constantly  
35 evolving from kilometer to hectometer resolutions, enabling unprecedented detail in the representation of atmospheric processes (Hohenegger et al., 2023; Klocke et al., 2025). However, the development and calibration of these high-resolution approaches pose significant challenges (Shukla et al., 2010). They are extremely energy- and resource-intensive in terms of both computing resources and storage requirements. As a result, iterations, parameter optimizations, and sensitivity studies can no longer be easily performed (Mauritsen et al., 2022). For this reason, alternative and efficient approaches are needed to  
40 understand how well regional to locally limited phenomena are represented at high resolutions and standard parameter settings.

One typical solution to this problem is to use limited-area domains with high spatial resolution that refine the global model simulations in a predefined limited area and within a certain time period, thereby significantly reducing the computing resources required. These limited-area solutions can be designed to be consistent with global simulations by using initial and boundary conditions derived from them and working with the same set of physical parameterizations. Of course, the capability of limited-area approaches is inherently somewhat constrained, since interactions with boundary conditions can introduce errors and the ~~influence of larger-scale processes~~ upscale influence of small-scale processes onto the larger scales is not captured adequately. The atmospheric component of the Earth system model ICON (~~ICOsahedral Nonhydrostatic~~) (ICOsahedral Nonhydrostatic, see Zängl et al., 2014) already includes the possibility of simulating such regional domains with nested grid refinements (Stevens et al., 2020; Zängl et al., 2022; Hohenegger et al., 2023). These approaches are usually limited  
50 to spatially fixed domains that must be defined in advance. This concept is very well suited for spatially and temporally limited phenomena, such as the diurnal evolution of convection over land under rather calm wind conditions. However, the approach with fixed regional domains is less suitable when the weather phenomena under consideration propagate over large distances, such as hurricanes, and thus the covered area is as large as entire oceans. For this class of problems, high resolution Lagrangian approaches are interesting, in which the refined grids are shifted along the path of the phenomenon under consideration. Such  
55 approaches have been successfully applied for a long time for flexible high resolution hurricane forecasts in operational settings (Kurihara et al., 1998; Gopalakrishnan et al., 2002).

For predicting the path of hurricanes, km-scale model approaches have been shown to reach reduced track position errors (Dong et al., 2020). For good-accurate simulations of the structure and intensity of hurricanes, an explicit and well-designed representation of deep moist convective processes also appears to be key (Gao et al., 2023). It has been further shown for Hur-

60 ricane Katrina, that its intensification and structure of its convective bands only improved sufficiently when a spatial resolution  
of around 1 km is achieved (Davis et al., 2008). Systematic investigations in Davis et al. (2011) have also shown that intensity  
biases with resolutions around 1 km are reduced, especially for very high wind speeds, compared to coarser model resolutions.  
The study argues that it is essential to resolve cloud structures in hurricanes, but also that significant improvements between  
100 m and 1 km horizontal resolution are questionable. These examples can be continued and provide evidence that a high  
65 spatial resolution is essential for realistic hurricane simulations and that entering the sub-kilometer scale may need further  
investigations.

Together, high spatial resolution and flexible adaptation of simulation domains can help enable novel, high-quality hurricane  
simulations while keeping computing costs within reasonable limits. Our efficient approach presented here contributes to  
this goal and advances the capabilities ~~for the Earth system model ICON~~ of ICON model. Redesigning the grid and data  
70 management in ICON and the associated communication patterns is so challenging, and the risks of negatively impacting the  
outstanding performance achieved in Klocke et al. (2025) are so high, that we have decided to implement a workflow-based  
approach to make regional hurricane simulations more flexible. This approach is an intermediate step on the way to a fully  
Lagrangian model concept and has the advantage that we can completely retain the proven and optimized communication  
patterns and data structures of ICON. Our approach allows us to take advantage of the flexibility that ICON offers through its  
75 ability to create user-defined grids. In this way, we can perform targeted and efficient hurricane-centric simulations down to the  
hectometer scale without having to re-optimize the efficiency of the underlying model. We are thus creating the possibility of  
using an approximate Lagrangian approach with the ICON versions available today to create innovative datasets for hurricane  
investigations in very high resolution. With this approach, we would like to encourage the scientific modeling community  
in general to give more consideration to co-design methods that promote the parallel development of sophisticated global  
80 simulation approaches and flexible and efficient regional refinements.

The paper is structured as follows: In Sect. 2, we present the methodology of our flexible refinement workflow in detail. We  
provide a conceptual overview together with detailed workflow diagrams and discuss the portability of our methods to different  
high-performance computing platforms. Sect. 3 demonstrates the application of the workflow using Hurricane Paulette (2020)  
as an example. Different refinement strategies are explored, and the results of high-resolution simulations are presented and  
85 discussed. There we also provide an analysis of the performance and resource requirements of our approach. Finally, Sect. 4  
summarizes the key findings and outlines potential future directions for research in this area.

## 2 Methodology

### 2.1 General Overview

Figure 1 provides a general overview of the flexible refinement workflow used to create high-resolution hurricane simulations.  
90 The various steps are carried out sequentially. The first step is to create a base simulation of a hurricane. Both global and  
sufficiently large regional setups can be used for this purpose. In the example case presented in Sect. 3.1, ~~two one-way-nested  
domains with grid spacings of 5 and 2.5 km are employed to cover~~ a limited-area setup covering the entire tropical Atlantic

## Flexible Refinement Workflow



**Figure 1.** Overview of the flexible refinement workflow: Five steps are shown in different colored boxes and numbered accordingly. The steps of the workflow include (1) creating the base simulation, (2) identifying and tracking the hurricane, (3) creating the flexible grids and other necessary simulation data, (4) combining the initial conditions from the base and newly created simulation data, and (5) performing the actual high-resolution hurricane simulation. Gray arrows indicate the flow in the workflow diagram, with steps 4 and 5 being performed as iterative loop over the respective hurricane segments.

~~within a regional configuration~~ is employed. Global storm-resolving simulations, such as the projections of the nextGEMS project (Segura et al., 2025), could also be used as base simulations. A wide range of data from the base simulation will be required in subsequent steps.

An important prerequisite is that the base simulation generates a hurricane and reproduces its characteristics sufficiently well. In the second step (see Fig. 1), the hurricane is identified in the base data and tracked over time. This tracking process creates a Lagrangian reference system, initiating the transition from a fixed domain to a flexible, hurricane-centric setup. It is important to note that we follow the hurricane as a large-scale structure which is not necessarily the same as shifting the domain according to the mean horizontal wind.

In the third step, we split apart the hurricane track into individual elements, which we refer to as "*segments*". Based on these, flexible and user-defined grids are set up that overlap so that previous information can be used for subsequent simulations. All essential data like external parameters, lateral boundary and initial conditions (ICs) are created specifically for these grids. This completes the pre-processing workflow.

Steps four and five build the production workflow. Both steps are performed alternately for each simulation segment. Step four generates the respective ICs from which the atmospheric simulation is started. For the first segment, ICs are created solely from the base simulation. Step five conducts the actual high-resolution hurricane simulations in the respective grid segment and stores the necessary ICs for the next simulation. For the second and the subsequent segments, the loop goes back to step four and data from the previous segment is reused in the overlap area for the new simulation. Where there is no overlap between



**Figure 2.** Schematic representation of a track segment. The reference track is represented by a thick, dashed black line. A grid segment with a width of  $\Delta s_{\text{width}}$  is constructed around it (thin solid black line). The spatial points A to D are determined by their temporal sequence along the track. The circles around points B and C indicate the areas of interest for analysis at the start and end time of the simulation within the segment. Points A and D show the extension of the grid segment by a predefined time  $\Delta t_{\text{add}}$ . For simplicity, only the outer nest of the track segment is shown. Further nests follow the same scheme, but lie inside the outer nest with smaller across-track widths.

110 two subsequent grid segments, ICs from the base simulation are taken. Thus, step four produces a mixed initial state consisting of a merge of two information sources [\(see Sect. 2.3 for more details\)](#).

## 2.2 Segment Concept

Our entire workflow is based on the idea of simulating a hurricane only within its vicinity along its temporal evolution. To accomplish this efficiently, we rely on a segment concept for which a reference track is divided into individual *track segments*.

115 The length of the track segments is mainly determined by the envisioned re-initialization time interval,  $\Delta t_{\text{reinit}}$  (plus some additional buffer). Re-initialization data must be available from the base simulation for the chosen interval, e.g. 12 or 24 hours, to support the re-initialization of the higher-resolution simulations.

Figure 2 shows how a track segment is constructed. The points B and C correspond to the location of the hurricane center in the base simulations at times  $t_0$  and  $t_0 + \Delta t_{\text{reinit}}$ . The points A and D expand the track segment in the respective directions  
 120 by a certain buffer distance to account for situations in which the hurricane moves slower or faster along its path in the higher-resolution simulations. For practical reasons, this buffer distance is also specified as a time interval,  $\Delta t_{\text{add}}$ . Combining re-initialization interval and buffer time, the selected track segment runs from point A to point D and thus covers the distance traveled by the hurricane e.g., from [18-21](#) UTC the previous day to 15 UTC ( $\Delta t_{\text{add}} = 3$  h;  $\Delta t_{\text{reinit}} = 12$  h).

A *grid segment* refers to a track segment that has been spatially expanded horizontally. It is constructed by expanding the  
 125 selected track segment by a user-defined across-track width,  $\Delta s_{\text{width}}$ , in all directions, forming a tube-like shape. Imagine a circular area with a radius of  $\Delta s_{\text{width}}$  and the center at the respective track point sweeping over the track segment. The circular section at a time  $t$  is defined later as Lagrangian analysis region for more detailed investigations (see Sect. 3.4).

Finally, the segment concept is applied to different start times  $t_i$  which link the  $i$ -th segment to an individual initialization time. For practical reasons, we count segments in relation to the initialization time of the reference  $t_{\text{ini}}$ . The start time of the  $i$ -th segment is thus given by  $t_i = t_{\text{ini}} + i \Delta t_{\text{reinit}}$  where  $i=0$   ~~$t_k = t_{\text{ini}} + k \Delta t_{\text{reinit}}$  where  $k=0$~~  selects  $t_0 = t_{\text{ini}}$ . If e.g. 24 hours of model spin-up are omitted from the reference data, the first meaningful segments can be found at  $i=1$   ~~$k=1$~~  for  $\Delta t_{\text{reinit}} = 24$  h and at  $i=2$   ~~$k=2$~~  for  $\Delta t_{\text{reinit}} = 12$  h. However, it is up to the user to define which segments are the first meaningful segments in their simulation chain.

### 2.3 Workflow Schemes and Implementation Details

Section 2.1 provides an introductory description of the various stages incorporated within the workflow. Specifically, steps 1 through 3 are categorized under the pre-processing workflow, while steps 4 and 5 pertain to the production workflow. The automation of tasks using algorithms exhibits varying degrees of complexity. In the following, a detailed analysis is shown that details the implementation of the most complex algorithms used throughout the workflow.

Figure 3 provides a comprehensive flowchart of the grid generation algorithm. The starting point is the horizontal wind field at 10 m height from the base simulation that is converted to relative horizontal vorticity  $\zeta$  and further coarse-grained with a ~~convolution filter~~ running-average filter with a width of around 200 km. The coarse-grained vorticity  $\zeta_c$  field allows to identify larger-scale cyclonic motions such as those characteristic for hurricanes. Detection and tracking of cyclonic features is done with the open-source python package *tobac* (Heikenfeld et al., 2019; Sokolowsky et al., 2024). A ~~criterion of ten daily revolutions~~ threshold criterion of  $\zeta_c = 10 \text{ day}^{-1}$  was used for identification, ensuring only the strongest motions were selected ~~based on this quantitative threshold~~. Please note that a variety of other and more customized tools are available for identifying and tracking hurricanes, such as TempestExtremes (Ullrich et al., 2021) or the approaches by Kleppek et al. (2008) and Enz et al. (2023), which could have been applied here with equal justification. The preparation of the hurricane track data from base simulations is concluded by a matching algorithm. It utilizes location data of past hurricanes from HURDAT (Landsea and Franklin, 2013) to find the closest matching hurricane track in the base simulations (similar to Gutmann et al., 2018). This use of observational best-track data only provides additional insights for nudged simulations or simulations in a forecast mode, for free-running climate simulations a comparison to the observational track may not be physically meaningful.

The actual grid generation loop is entered with data from the best matching track, from a base grid (here, we take the grid from the finest reference nest) and from a configuration file that allows users to specify the along- and cross-track extend of the grid segments. The grid generation algorithm relies on DWD-ICON-Tools software (see Zängl et al., 2022, for grid-related aspects), facilitating the creation of flexible ICON grids through masks, crucial for our hurricane-centric workflow. For masking, a chosen base grid is read. Then, the track segment and its spatial extension by the across-track width,  $\Delta s_{\text{width}}$ , are transferred to this grid to create a mask. The resulting mask is then used in the DWD-ICON-Tools grid generator to create the next refinement cutting out only the chosen grid segment. This builds the outermost nest of a flexible setup and serves as the basis for further refinements. If multiple nests are targeted, the track segment is transferred again, now to the just created outermost nest, and the lateral extension is performed again with a predefined, but smaller across-track width. This process is repeated several times until all nests for the respective refinement levels have been created. In Fig. 3, the shown loop

## Grid Generation



**Figure 3.** Detailed flowchart for the sequential grid generation process. Final start and end points are highlighted in red. Incoming and outgoing data are visualized as slanted blue boxes and methods that treat these data are shown as green rectangles. The index  $n$  counts the number of nested domains and thus determines the number of iterations in the grid generation loop. [The term R2B10 indicates the triangular grid configuration of the ICON base run with a grid spacing of approximately 2.5 km.](#)

determination criteria is  $n = 3$  which means that a sequence of three nested grids with successively halved grid spacing are created. Finally, these nested grids resemble layers of an onion.

165 Figures 4a and b split up the automated algorithm for IC generation into a pre-processing part and into a production part. For IC pre-processing, data from the base simulation, here noted by  $IC^*$  as well as reference grid (source) and segment grid (target) are input. The [horizontal](#) regridding uses the tool `cdo` (Schulzweida, 2023) together with a conservative remapping to calculate regrided  $IC^*$ . This dataset is input into a test ICON run that serves several purposes. With the test run (i) the integrity of the execution workflow is tested, (ii) performance-relevant aspects are investigated and resources for production runs are estimated and (iii) internal vertical interpolation is applied to consistently bring the regrided  $IC^*$  from the reference levels to



**Figure 4.** Detailed flowchart for (a) initial conditions pre-processing and (b) initial conditions production. Final and intermediate start and end points are highlighted in red. See Fig. 3 for meaning of the other elements. The index  $k$  counts the number of segments along the hurricane track. The loop terminates after a user-defined number of segments, e.g. here  $k = 6$ . [The term L70 \(L150\) indicates the vertical grid configuration of the ICON base run with 70 \(150\) vertical levels.](#)

170 the possibly more refined target levels. After that point, the IC pre-processing workflow stops with the decision whether the considered segment is chosen to be the initial segment or not.

In the IC production chain, regridded IC\* are input into the full ICON run for the initial segment. At the end of the successful full ICON run, IC data for initializing the next segment are stored. Due to along-track shifts of the grid segments, these IC data only partially cover the region of the next segment. To compensate for this offset, a merging algorithm is applied that maps the  
 175 partial IC data from segment  $k - 1$  to the grid for segment  $k$  in the overlap area. The remaining parts are filled with regridded IC\* from the reference. [A distance-based weighting smooths the transition between the two IC data sources by weights that decrease linearly with distance from the overlap boundary.](#) Still, the mix of two IC ~~dataset~~ [datasets](#) introduces a discontinuity in the initialization - a limitation that is discussed in depth in Sect. 3.5.

180 After grid and IC generation, the external parameters and boundary conditions are remapped onto the newly created grid segments. The former is directly interpolated from the original external data onto the respective grids yielding the highest possible resolution of e.g. topography. The latter is exclusively obtained from the base run data and mapped using cdo on the respective lateral-boundary grids of the high-resolution simulations.

## 2.4 Portability and User Interfaces

The workflow toolkit is intended to run on super-computing platforms. It consists of a mix of python tools and bash scripts, the latter being submitted into a HPC scheduling system. The workflow was initially developed for the German Climate Computing Center (DKRZ) and its computing platform Levante and adjusted to its specific module environment and the Simple Linux Utility for Resource Management (SLURM) scheduler. The toolkit was then ported to the Jülich Supercomputing Center (JSC) Platform JUWELS, and its most important aspects were generalized. We therefore consider the software to be relatively platform-independent. In order to port the workflow toolkit, only the configurations of the corresponding module environment and the SLURM schedulers need to be properly set up for new platforms.

195 Users can readily configure the toolkit via a detailed configuration file, allowing them to set and modify parameters, as well as file and software dependencies, for different numerical experiments. We chose a TOML (Tom's Obvious, Minimal Language)-based configuration containing clearly structured elements and sections that can be easily edited with standard text editors. Additionally, we provide wrapper scripts to initiate the execution of entire workflows. It is possible, on the one hand, to start the pre-processing workflows of an entire series of consecutive grid segments. This results in the parallel execution of individual workflows that carefully handle their internal sequential dependencies. On the other hand, the production workflow wrappers can be executed. These trigger the execution of the ICON model in the selected grid segment with multiple restarts, if necessary, and merge the ICs before starting an ICON run for the next segment. All other user-relevant information can be found in the documentation of the latest software release (Senf, 2026c).

## 200 3 Application

### 3.1 Case Description

We now introduce a hurricane case chosen for demonstrating our flexible refinement workflow for hurricane-centric high resolution simulations. In 2020, Hurricane Paulette crossed the Atlantic and, with a total length of around 11,400 km, was one of the hurricanes with the longest track for that year. According to the National Hurricane Center's tropical cyclone report, Paulette formed as a tropical depression in the central Atlantic on September 7 and intensified into a tropical storm as it moved northwestward (National Hurricane Center, 2021). It reached category 1 hurricane status on September 13, intensified further into a category 2 hurricane in the early hours of September 14, and reached peak intensity of 90 kt ( $46 \text{ m s}^{-1}$ ) and 965 hPa around 18 UTC on September 14. A snapshot of Paulette during its most intense phase is shown in Fig. 5a. Paulette finally

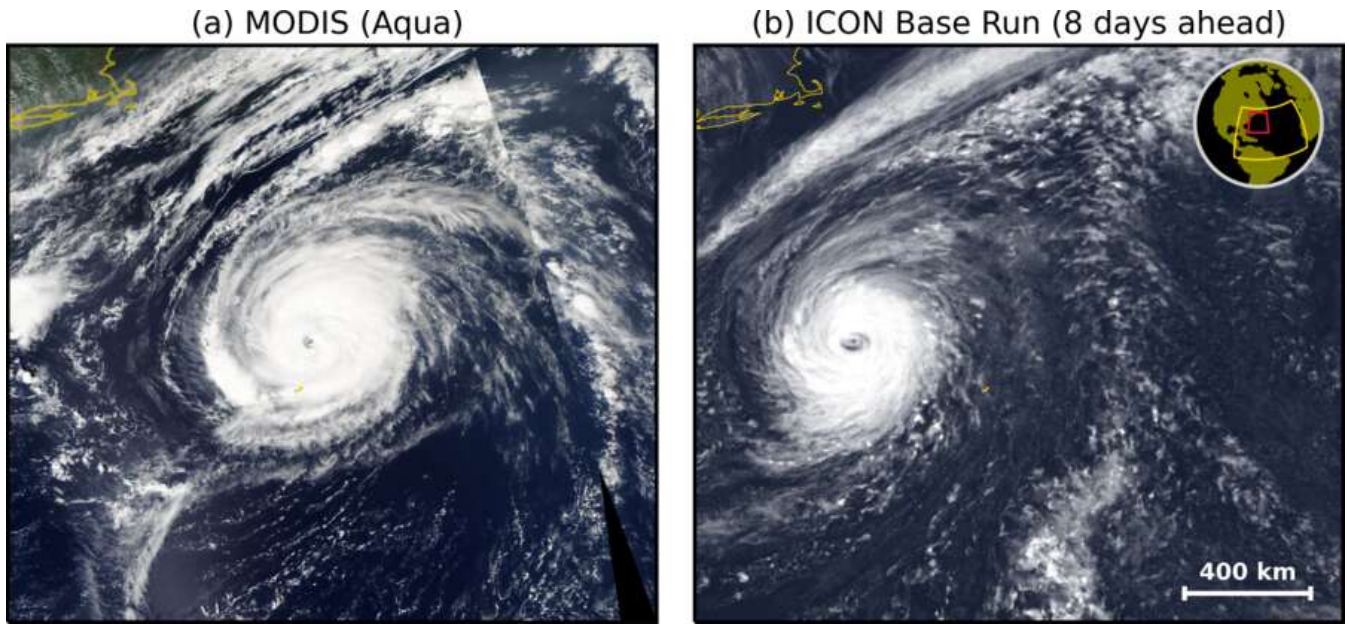

**Figure 5.** Top view of hurricane Paulette from (a) observations and (b) simulations. A regional cutout in the Atlantic ocean was defined reaching from  $-74.0$  to  $-53.4$  ° E and from  $25.0$  to  $43.2$  ° N. Subpanel (a) shows a true-colour image acquired by the Moderate Resolution Imaging Spectroradiometer (MODIS) instrument on the NOAA-AQUA satellite during an ascending orbit at overpass time on 14 September 2020, around 18:00 UTC. Subpanel (b) provides a simulation of the reflected solar radiation flux, normalized between  $100$  and  $750$   $\text{W m}^{-2}$  from our ICON base run, which was initialized on 7 September 2020 at 0 UTC. The time, geographical region and projection have been matched between the observation and the simulation. The color scale and map in (b) have been adjusted to ensure visual consistency with (a). The length scale of  $400$  km is shown in the lower right corner of (b) and the inset in the upper right corner of (b) shows the location of the [image cutout \(red outline\)](#) and the [inner base run domain \(yellow outline\)](#) in the Atlantic ocean.

210 transitioned into an extratropical cyclone at 12 UTC on September 16. During its first seven days of formation and main intensification period, Paulette’s path was relatively straight, making it an ideal use case for our workflow methods.

### 3.2 Base ICON Run

The ICON ~~weather and climate~~ model solves hydrodynamic equations on a triangular grid (see Zängl et al., 2014; Dipankar et al., 2015), and can operate as a global or regional modeling system (Hohenegger et al., 2023; Müller et al., 2025). For our baseline run, we used the regional setup of the ICON model in the configuration with the numerical weather forecast (NWP) physics package (Zängl et al., 2014). The base simulations ~~were performed in online with an outer limited-area setup and grid spacings of 5 km forced by ERA5 data (Hersbach et al., 2020) were performed into which a second, inner domain with 2.5 km grid spacing was nested using~~ one-way ~~nesting mode with two nested domains coupling~~.

For the outer nest, a spatial extent of  $9900$  ~~times~~  $\times$   $6700$   $\text{km}^2$  was chosen, which covers most of the tropical and subtropical Atlantic north of the equator. The outer nest was configured as R2B9 triangular ICON grid, corresponding to an equivalent grid

220 spacing of 5 km. In this domain, convection processes and convective precipitation were parameterized following Bechtold et al. (2008) based on Tiedtke (1989). For the inner nest, the ICON R2B10 grid setup was chosen, corresponding to a grid spacing of approximately 2.5 km. The vertical resolution of the base run was set to 70 model levels in both nests, extending from sea surface to a maximum height of 34 km. The inner nest is driven by the outer nest via a nudging zone close to the lateral boundary. However, due to one-way coupling, the inner nest does not provide feedback to the outer nest. In the inner  
225 nest, subgrid-scale convection was partially parameterized. The resolved model dynamics explicitly represent deep convective processes, while a parameterization approach still approximates shallow to mid-level convection. This setup has been shown to sufficiently reproduce realistic marine cloud structures and cloud radiative effects (Senf et al., 2020).

All other parameterizations from the NWP physics package were selected identically for both setups. Thus, all ICON simulations used the two-moment cloud microphysics scheme after Seifert and Beheng (2006). Subgrid-scale turbulent fluxes were  
230 calculated using a closure approach, as described by Baldauf et al. (2011), which includes the prognostic calculation of turbulent kinetic energy. The scheme ecRad was used for radiation calculations (Hogan and Bozzo, 2018). It performs radiative calculations in 14 solar and 16 terrestrial pre-defined spectral bands.

The simulations utilized in the following were initialized at 0 UTC on September 7 using the ERA5 data, a reanalysis dataset produced by European Centre for Medium-Range Weather Forecasts (ECWMF, Hersbach et al., 2020). This corresponds to  
235 a time when Paulette had already developed into a tropical depression. ~~Spin-up effects are clearly visible in the first hours of model simulations.~~ ERA5 data is available six-hourly as boundary data for the outer nest. For the base run, ICON version v2.6.6 is selected, which was the most recent ICON version at the time the base simulations were created. On top of this version, an update was developed that allows the sea surface temperature from ERA5 to be updated daily for all regional nests (Senf, 2026a). Therefore, SST fields are not kept constant at the initial SST values, but changed on a daily basis for our  
240 hurricane base simulations. Consequently, the actual effects of Paulette on the ocean surface are already included, which could indeed negatively impact the quality of simulating the hurricane development (Bender and Ginis, 2000). The output of the base run was configured so that data for initialization or re-initialization of higher-resolution runs is available every six hours. Furthermore, data to drive high-resolution runs via lateral boundary conditions is available at a resolution of one hour.

Figure 5b shows a visual impression of Hurricane Paulette simulated with our base run setup, at the time of the most intense  
245 hurricane period. The figure shows the reflected solar radiation at the top of the atmosphere for the inner R2B10 nest after an integration time of around eight days. For operational forecasts, Gao et al. (2023) reported a mean track error of approximately 300 km after 5 days of lead time. Here, a distance of approximately 400 km between our simulated hurricane center and the observation is achieved, which is a very positive result for a hindcast with around 8 days of lead time. Given the complexity and multiple interacting processes involved in hurricane formation, the reasonably good agreement was somewhat unexpected  
250 for the rather long forecast lead time. Although the variables being compared between the observation and simulation are not the same, making a quantitative comparison difficult, we still observe interesting differences in the morphology of the simulated hurricane compared to the observation. It appears that the spatial extent of the simulated anvil cloud associated with the hurricane is underestimated. Insufficient spatial resolution could be one reason for this discrepancy, among many others,

and methods that lead to more spatially refined simulations, such as the workflow presented in this paper, would be an important  
255 step in further investigating this question of resolution dependence.

### 3.3 Exploration of Different Refinement Strategies

In the following, we will examine the refinement workflow presented in Sect. 2 in more detail for Hurricane Paulette as an  
example. As shown previously, the base run results reveal an intriguing hurricane development, motivating us to conduct  
further investigations with higher resolutions. This is exactly the starting point for the flexible refinement workflow presented  
260 in this paper. The base data is now entered into the flexible grid calculation alongside the calculated track of the simulated  
hurricane.

As a user, one can now choose from various important parameters. These parameters determine how many grid segments  
are created and their size. The first fundamental question concerns the spatial resolution. Starting with the resolution of the  
base run (R2B10 with 2.5 km), higher resolutions can be achieved through successive refinement. The following example uses  
265 setups with three nests, ranging from R2B11 with a grid spacing of 1.2 km to R2B13 with a grid spacing of approximately  
300 m. The currently implemented workflow can handle fewer nests but would require additional software updates for using  
more than three nests. In principle, it is also possible to start initial refinement from grids finer than the base grid [for which  
minor software updates would be needed.](#)

Figure 6 shows various implementations of grid segmentations for Paulette. These implementations vary either the length of  
270 a segment along the hurricane track (white line) using the "reinit" parameter  $\Delta t_{\text{reinit}}$  or the across-track width  $\Delta s_{\text{width}}$ . The  
different grid segments are visualized by different colors. When  $\Delta t_{\text{reinit}} = 12$  h is selected (Fig. 6a and c), the grid segments  
appear shorter and more compact. However, more grid segments must be calculated sequentially to cover the same integration  
period. For the 12-hour re-initialization setup, it makes sense to start with segment 2 on September 8, 2020, at 0 UTC to avoid  
spin-up of the base run. If the integration ends after the 12th segment, as shown, the hurricane's development can be tracked  
275 for five days and 12 hours. The 24-hour re-initialization setup requires fewer segments. However, each segment covers a larger  
region and requires more computing power (see Figs. 6b and 6d). Each of the 24-hour setups shown starts with segment 1, and  
sequential integration up to segment 6 covers a period of six days.

Another important parameter determines the width of the segments across the track,  $\Delta s_{\text{width}}$ . Ideally, the width would be  
chosen so that the hurricane development would not be significantly influenced by the lateral domain boundaries. In practice,  
280 computational constraints are significant, so responsible scientists must select the smallest feasible domain size. Given these  
two requirements, it is difficult to provide definite advice and determine in advance what the optimum width would be. Two  
possible configurations are provided in Fig. 6. First, the innermost high-resolution nest at R2B13 is selected so that the across-  
track width, measured as distance between the track center and the domain edge, is 100 km. Second, a wider setup was tested  
in which the inner nest was extended to 200 km. Table 1 shows the extent of the two outer high-resolution nests in detail.

285 ~~After grid generation, as described in Sect. 2.2, the external parameters, ICs, and boundary conditions are remapped onto  
the newly created grid segments. The latter two are obtained from the base run data and prepared for the high-resolution  
simulations. High-resolution simulations also require vertical refinement. For our examples, we chose 150 vertical levels~~

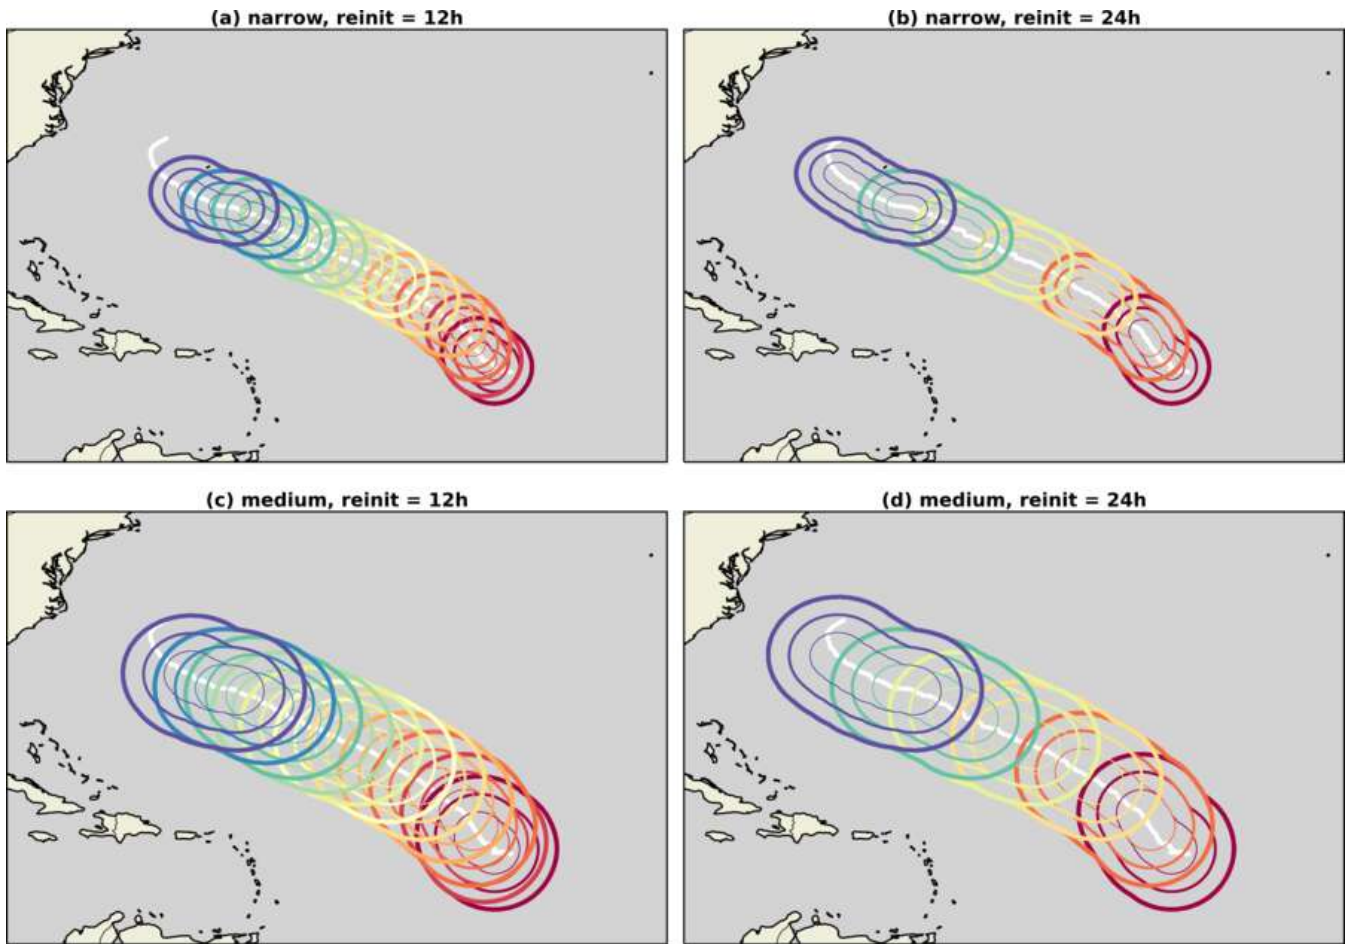

**Figure 6.** Grid segments prepared for hurricane Paulette (2020) with differently chosen re-initialization times and across-track widths. The narrow setup in (a) and (b) is compared to the medium setup in (c) and (d). Re-initialization at 12-hour intervals (a, c) leads to twice as many segments as re-initialization at 24-hour intervals (see Tab. 1). The track of the hurricane Paulette in the base simulation is plotted as a white solid line. Each segment consists of three nested domains (solid lines of decreasing thickness) colored by the initialization time, ranging from red on September 8 to blue on September 14.

(analogous to Heinze et al., 2017; Stevens et al., 2020), extending again to an altitude of 34 km. We apply the ICON internal interpolation routines for the required vertical interpolation of the initial data to ensure consistency with the vertically discretized hydrostatic balance in the model. The interpolation is carried out as part of a model test run.

**High-resolution** ICON simulations were performed in the respective grid segments using the latest available version of ICON (v2025-04-2) (ICON partnership, 2025) at the time of the study. We chose 150 vertical levels (analogous to Heinze et al., 2017; Stevens et al., 2020), extending to an altitude of 34 km. Cloud microphysics and radiation were set up similarly to the base run. However, subgrid-scale turbulence was configured with a three-dimensional Smagorinsky-type mixing scheme and convection parameterization

**Table 1.** Comparison of grid and compute requirement parameters across re-initialization configurations and domains (DOM) listed in the different columns. The computational units (cu) refer to the product of the number of time steps and the number of horizontal grid cells and is a measure of the size of a limited area experiment.

| property              | reinit   | narrow |       |       | medium |       |       | large | x-large |
|-----------------------|----------|--------|-------|-------|--------|-------|-------|-------|---------|
|                       |          | DOM01  | DOM02 | DOM03 | DOM01  | DOM02 | DOM03 | DOM01 | DOM01   |
| grid                  | 12h /24h | R2B11  | R2B12 | R2B13 | R2B11  | R2B12 | R2B13 | R2B11 | R2B11   |
| eq. resolution / m    | 12h /24h | 1200   | 600   | 300   | 1200   | 600   | 300   | 1200  | 1200    |
| width / km            | 12h /24h | 300    | 200   | 100   | 500    | 350   | 200   | 750   | 1000    |
| ave. # cells / $10^6$ | 12h      | 0.35   | 0.76  | 1.2   | 0.79   | 1.8   | 3.1   | -     | -       |
|                       | 24h      | 0.46   | 1.1   | 1.8   | 0.96   | 2.3   | 4.2   | 1.8   | 3       |
| cu / $10^9$           | 12h      | 25     | 110   | 350   | 57     | 250   | 880   | -     | -       |
|                       | 24h      | 33     | 150   | 510   | 69     | 330   | 1200  | 130   | 210     |

295 [was completely deactivated \(following Stevens et al., 2020\)](#). To enable a [warm-start-consistent re-initialization](#) of complete cloud microphysics, the ICON source code was modified to incorporate vertical interpolation of all microphysical moments (Senf, 2026d). This means that graupel mixing ratios and ice crystal number concentrations, for example, are available as fields when the high-resolution simulations begin and when they are re-initialized. [Consequently, all cloud variables are available without discontinuities and abrupt changes throughout the entire simulation period.](#) These initial fields are made available for all nests simultaneously, enabling a seamless continuation of the simulations when switching from one segment to the next.

300 Figure 7 shows examples of the results of two high-resolution ICON configurations with different grid segmentation. The narrow-size setup is compared with the medium-size setup, both of which have a 12-hour re-initialization period. The position of the simulated hurricane pressure minimum in the high-resolution run remains close to the reference track of the base run. There are no significant differences in minimum position for different simulation resolutions, but same grid configuration.

305 However, as expected, the track of the wider setup deviates more strongly from the reference track. This is plausible because the position of the hurricane center in the wider setup is not as strongly constrained by the forcing at the lateral boundaries. The intensity of the simulated hurricane, as shown by the development of the pressure minimum in Fig. 7b and the maximum 10-meter wind speed in Fig. 7c, clearly depends on the resolution. This is evident from the greater spread of the curves ([esp. in Fig. 7b](#)), which is as large as that induced by different grid configurations. [Better resolved convective activity generates particularly high gustiness of the 10 m wind, which explains the fluctuations on the very short time scales in Fig. 7c.](#)

310 However, a more detailed investigation of the resolution effects and their causes and consequences must be postponed to a follow-up study.

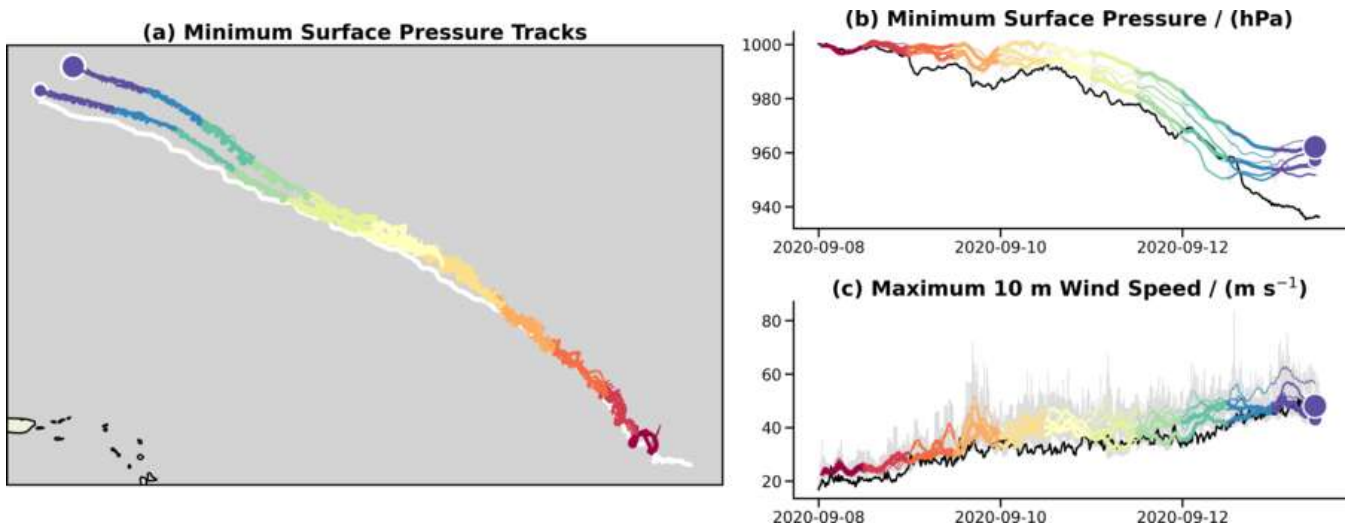

**Figure 7.** Simulated hurricane characteristics for grid configurations with differently chosen cross-track widths. (a) The minimum pressure positions are plotted on a map, with colors representing the respective grid segments. The re-initialization time between successive segments is set to 12 hours. The narrow-size setup (small, solid circle at the end of the track) is compared to the medium-size setup (larger, solid circle at the end of the track). Different resolutions are plotted with different line thicknesses, ranging from thick for R2B11 to thin for R2B13, and they partially overlap. Minimum pressure positions from the base run are plotted in white. The minimum pressure and maximum 10-m wind speed are presented using similar color and line encoding as in (a). A running-average filter is applied to the curves in (b) and (c) to reduce noise. The original data is shown in light gray shading in the background. Data from the base run is shown in black.

### 3.4 Prototyping Lagrangian Analysis

The grid remains static during the simulation of a grid segment, and the output is only available for statically defined grids.

315 Output variables are written directly to the ICON grid. Additionally, variables can be internally interpolated in ICON to a regular longitude-latitude grid and then output on this grid. This allows variables to be stored on slightly coarser grids at a higher temporal frequency. Our workflow toolkit includes an option to automatically calculate suitable longitude-latitude grids for the corresponding flexible grid segments. This creates a suitable longitude-latitude grid for each grid segment on which standard analyses can easily be performed. Figure 8 shows an example of such an output, displaying 2-meter temperature,

320 10-meter wind speed, reflected solar radiation flux at the top of the atmosphere (TOA), and total column water vapor for a given point in time. The sequence shows three nested grids for each variable, with grid spacings of 1200, 600, and 300 m. The utilization of these representations facilitates the comparison of the effects of varying resolutions on the fine structure of the simulated hurricane. However, Fig. 7-8 also demonstrates that important parts of the hurricane may no longer be contained within the chosen domains, especially for the finest nest of 300 m grid spacing and rather long integration times of nearly

325 five days. This illustrates the compromises-trade-offs responsible scientists must make-navigate between accuracy, resource requirements, and efficiency.



**Figure 8.** An overview of various variables, shown in the respective nests for a specific grid segment. The grid configuration was chosen so that the re-initialization time is 12 hours and the nests have an across-track width of 300, 200, and 100 km, respectively (narrow-size setup). The equivalent grid spacing is indicated above the respective nest. Variables shown are (a) 2 m temperature, (b) 10 m wind speed, (c) reflected solar radiation flux at TOA and (d) total column water vapor for segment 11 at 18 UTC on 12 September 2020.

The visualizations on the static grid above have the typical characteristics of an Eulerian analysis, in which the reference points do not change over time. However, our hurricane-centric simulations make it possible to change the perspective by defining only the circle that moves over the reference track as the analysis area (see segment concept in Sect. 2.2). This transformation into a Lagrangian reference system results in a smooth and consistent composition of the hurricane development despite the inherent discontinuity because of the separate grid segments. For example, the evolution of ice water path (IWP) is shown in Fig. 9. Most of the ice produced is located northwest-northeast of the hurricane center. The Lagrangian analysis region is highlighted in color. The remaining parts of the segment, which are not used here, are shown in light colors. Interestingly, the Lagrangian approach results in a continuous and smooth path of the IWP. It gives the impression that the grid segments are sliding across the Lagrangian analysis area. Thus, data from different segments can be assembled to create a hurricane-centric analysis that consistently covers several days of hurricane development on a hectometer scale.

### 3.5 Performance and Shortcomings

The following discussion will cover the advantages and disadvantages of the method described so far. One significant advantage is that the target areas of the simulations are relatively small compared to the total region affected by the hurricane. This means that an acceptable number of calculation steps is being performed. Table 2 summarizes computational units (cu) as a measure of computational effort. Here, one cu refers to 1,000 time steps of fast physics (dynamical core is adaptively sub-stepped by a

### Ice Water Path / ( $\text{g m}^{-2}$ ) at 1200 m Resolution

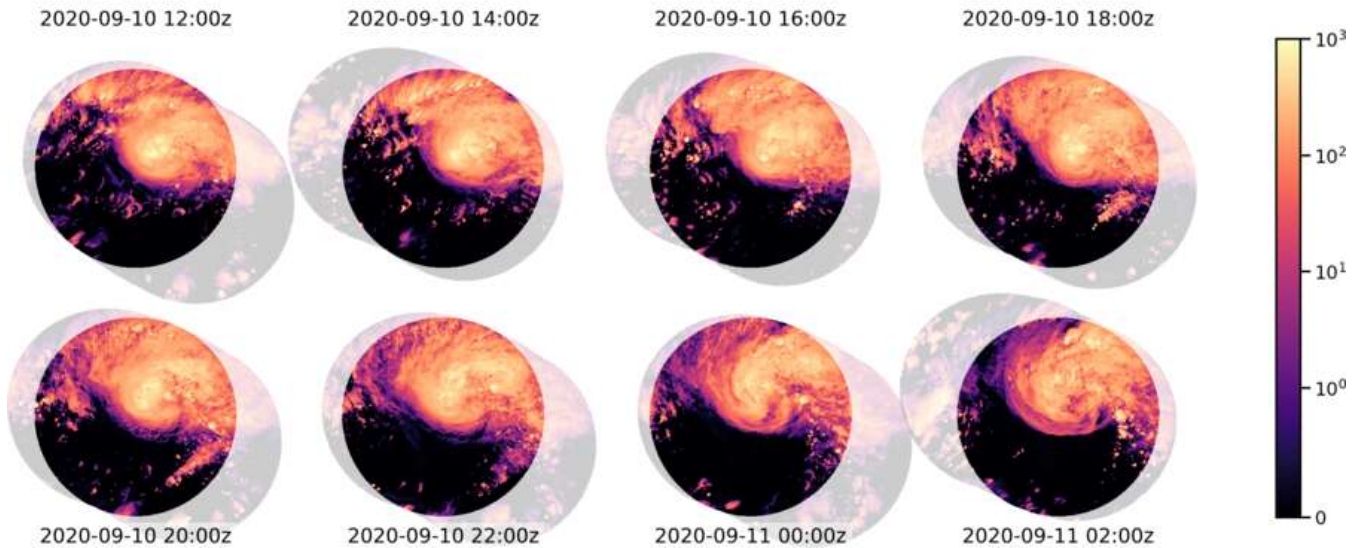

**Figure 9.** Ice water path is shown as a sequence in a Lagrangian framework. The boldly shaded ~~regions~~areas highlight the circular Lagrangian analysis area ~~region~~ that follows the track of the reference hurricane. The remaining parts of the respective grid segment ~~segments~~ are indicated by very light colors. Two-hour steps are made in the temporal sequence. ~~Discontinuous jumps~~Transitions between segments are visible between the first and second images, as well as between the second-to-last and last images. ~~However, there is no discontinuity appearing as shifts~~ in the domain boundaries. Within the Lagrangian analysis region, however, the ice water path evolves smoothly and continuously. Here, the medium-size grid configuration was chosen so that the shown nest (DOM01, 1.2 km grid spacing) has 500 km across-track width with re-initialization time of 12 hours.

factor of 5to 7), which are used to integrate one million horizontal grid cells forward. For the narrow-size case,  $cu$  increases from 480 to 700 when transitioning from the 12h-reinit setup to the 24h-reinit setup, which corresponds to an increase of approximately 45%. For the medium-size case, 1,190 and 1,610  $cu$  are required respectively, representing a factor of between 2.3 and 2.4 more resources than the narrow-size case, showing an increase of 35% between 12h-reinit and 24h-reinit just because of the larger domain size of the 24h-reinit segments. Therefore, the 12h-reinit setup is significantly more favorable in terms of resource requirements, and doubling the width of the setup also leads to approximately a doubling of resource requirements. The costs for expanding the setup to large and extra-large sizes are also shown. However, when comparing the numbers, it should be noted that only the outermost nest with a grid spacing of 1.2 km was considered for the larger setups and that the complete setup consisting of three respectively refined nests requires 20 to 25 times more resources.

~~The question, however, is whether do the savings through~~ To assess how the savings of our method compare to ~~those of~~ classic regional, limited-area applications, ~~in which the area must be large enough to encompass the entire duration of the hurricane. Taking the baseline run of our workflow as a reference, we find that it requires 6.3 million grid cells at a grid spacing of 2.5 km. A first refinement step (factor 4) with a simultaneous reduction of the target domain by 20% would result~~

355 in approximately 20 million grid cells. Integrating this setup forward with a time step of six seconds for six days would  
result in 86,400 time steps and a resource requirement of approximately 1,700 cu. Compared to large and extra-large setups,  
this would increase requirements by factors of 13 and eight, respectively (see two reference configurations are introduced in  
Tab. 2. The first is a tube-like setup that extends over the full hurricane track over the entire simulation period without splitting  
it into shorter segments. Such a tube shares the same cross-track geometry and nesting structure as our hurricane-centric  
360 segments, but is integrated as a single contiguous domain without re-initialization. The resource requirements for the tube,  
listed under the “6days” re-initialization interval, amount to approximately 2,640 and 5,440 cu for the narrow and medium  
three-nest configurations and 320 and 470 cu for the single-domain large and x-large setups, respectively. The second reference,  
labeled “classic” in Tab. 2). While using our methods here leads to a significant gain in efficiency, it must nevertheless be  
weighed against the disadvantages of the method. For further refinement steps, however, computational efficiency dramatically  
365 increases. Assuming further refinements to 600 and 300 m involving halving the grid spacing, doubling the number of time  
steps and reducing the domain by 20, represents a conventional fixed limited-area domain and is constructed as the smallest  
regular longitude-latitude bounding box that fully encloses the tube geometry for the respective cross-track width. For the  
single-domain case at 1.2% (combined factor of 6.4), the costs would be approximately 11,000 and 71, km grid spacing,  
the classic limited-area approach amounts to approximately 800 cu; a three-nest configuration requires around 20,000 cu,  
370 respectively. A nested setup of this magnitude would therefore have a total of around 84,000 cu, which, cu. Compared to  
this classic reference, the tube configurations already yield notable speedup factors of 7.6, 3.7, 2.5, and 1.7 for the narrow,  
medium, large, and x-large setups, respectively. Dividing the tube into short, frequently re-initialized segments adds a further  
factor of approximately 2 to 6, depending on the selected setup, corresponds to an additional requirement of a factor of  
approximately 50 to 175 chosen across-track width and re-initialization interval. Together, the segment configurations with  
375 frequent re-initialization achieve the largest speedups: factors of up to 42 and 17 for the narrow and medium three-nest setups  
with 12-hour re-initialization intervals, and up to 6.2 and 3.8 for the single-domain large and x-large setups with 24-hour  
re-initialization intervals (see Tab. 2). Considering the risk of model errors or suboptimal settings requiring reruns of high-  
resolution simulations, the use of our flexible workflow appears well justified.

In addition to the hypothetical requirements, Tab. 2 also shows the actual costs of executing the respective setups. The 12h-  
380 reinit setup was calculated on the DKRZ Levante platform using an ICON build created with the Intel compiler without the  
thread-based parallelization via OpenMP. Production runs were performed on 64 nodes, generating costs of 2,900 and 6,300  
node-hours for the narrow- and medium-size cases, respectively. This increase in costs by a factor of 2.2 roughly corresponds  
to the calculated increase in demand. The 24-hour reinit setup was calculated on the JSC JUWELS platform, which has fewer  
computing units than Levante, with 48 cores per node compared to 128. An ICON build was created and used on JUWELS  
385 with GCC, as well as without OpenMP. The narrow-size setup was calculated on JUWELS with 192 nodes, generating costs  
of 13,600 node-hours. The medium-size setup was calculated with 288 nodes and generated costs of 32,800 node-hours.  
Comparing the core hours values between Levante and JUWELS reveals that execution on JUWELS is 20–40% less efficient.  
This difference is probably due to the different compilers and their respective optimization settings, rather than hardware  
differences.

**Table 2.** Comparison of compute requirement and compute cost parameters across re-initialization configurations and domain sizes. The reinit row "6days" indicates a nested tube configurations with effectively no re-initialisations. The term "classic" refers to a potential, fixed domain configuration ~~extending across the whole Atlantic oceansuch that a corresponding tube configuration could be accommodated~~. Single domain configurations are marked by \*, all other domain configurations consist of three online coupled nests. The computational units (cu) refer to the product of physics timesteps and number of horizontal grid cells. The number of nodes and node hours refers to DKRZ Levante nodes with 128 cores for the 12h-reinit setup and to JSC JUWELS nodes with 48 cores for the 24h-reinit setup.

| property                           | reinit       | narrow                     | medium                   | large                   | x-large            | classic                       |
|------------------------------------|--------------|----------------------------|--------------------------|-------------------------|--------------------|-------------------------------|
| total cu / 10 <sup>9</sup>         | 12h          | 480                        | 1 190                    | -                       | -                  | -                             |
|                                    | 24h          | 700                        | 1 610                    | 130*                    | 210*               | -                             |
|                                    | <u>6days</u> | <u>2 640</u>               | <u>5 440</u>             | <u>320*</u>             | <u>470*</u>        | -                             |
|                                    | -            | -                          | -                        | -                       | <del>1700</del>    | <u>800*</u> , <u>8420 000</u> |
| potential speedup                  | -            | <del>120-7.6 - 17542</del> | <del>50-3.7 - 7017</del> | <del>132.5 - 6.2*</del> | <u>81.7 - 3.8*</u> | 1                             |
| total node hours (# nodes)         | 12h          | 2 900 (64)                 | 6 300 (64)               | -                       | -                  | -                             |
|                                    | 24h          | 13 600 (192)               | 32 800 (288)             | 3 100* (64)             | 4 400* (64)        | -                             |
| total core hours / 10 <sup>6</sup> | 12h          | 0.37                       | 0.81                     | -                       | -                  | -                             |
|                                    | 24h          | 0.65                       | 1.57                     | 0.15*                   | 0.21*              | -                             |

390 The immense increases in efficiency of our hurricane-centric setup however come at a price. Due to the limited size of the regional setups, the hurricane under consideration cannot develop completely freely and always remains influenced by the forcing at the lateral boundaries, which is stronger for a more narrow setup. In addition, the re-initialization procedure during the transition between segments introduces further challenges. The mix of ICs detailed in Section 2.3, which consist of different data sources inside and outside the overlap region of two subsequent segments, creates a discontinuity. This is smoothed out in the transition using a distance-weighted average. Despite this, ~~spin-up the merged ICs can excite spurious sound and gravity waves, and re-initialization~~ effects occur at the beginning of a simulation in a new segment. ~~To evaluate The following section evaluates the impact of these effects on simulation quality, we will now analyze the temporal evolution and statistical distributions of key atmospheric variables during the first three hours of each simulation segment. This analysis will allow us to quantify the magnitude of the spin-up effects, understand how they vary systematically across different domain configurations, and determine if they remain small enough to justify the computational efficiency gains of our approach.~~

395  
400 ~~To better understand the spin-up process through our~~

### 3.6 Analysis of Re-initialization Effects

To investigate the re-initialization strategy behavior in a controlled manner, we conducted sensitivity experiments following the same grid configurations as listed in Table 1, but with the runtime of each segment extended by three hours. This creates a

405 three-hour temporal overlap between consecutive segments, enabling a direct comparison of the atmospheric state from two successive segments at the same point in time and thus providing a pathway for directly quantifying re-initialization effects. To keep the analysis tractable, all sensitivity experiments were performed exclusively for the outermost nest (DOM01) at 1.2 km grid spacing. In addition, two parameter settings are compared throughout: the production setting with `init_latbc_from_fg=.FALSE` (labeled "LBC flag OFF") and an updated setting with `init_latbc_from_fg=.TRUE` (labeled "LBC flag ON"). The  
410 latter has been recommended by the ICON community since early 2026 to reduce model biases arising from mismatches between the initial lateral boundary conditions and the initial model state (see ICON Documentation, 2026).

In the following, we analyze the time series of thermodynamic and water-related atmospheric parameters for the first three hours in Fig. 10. There, the median values in the circular Lagrangian analysis regions (see Sect. 3.4) of selected surface and cloud variables are presented. For each variable, ~~its initial value was subtracted, such that all curves start at zero and any deviation can be analyzed easily. The time series allow to relate the initial development of different segments to each other. Systematically similar behavior can be attributed in part to spin-up effects.~~ the instantaneous difference between segment  $k$  and the corresponding values from segment  $k - 1$  extended by 3 h is shown, allowing a direct quantification of re-initialization-induced deviations between consecutive segments. The figure was created for the ~~outer nest of the~~ medium-size, 12h-reinit ~~setup and shows the relative progression of the different grid segments with different line colors shifting from blue to red with an initialization time at September 8, 2020 at 0 UTC and subsequent re-initializations each 12 hours~~ DOM01 setup with 1.2 km grid spacing (see Tab. 1). Light gray curves show the individual segment differences, and the thick solid (dashed) black curve gives their mean for the LBC flag OFF (ON) setting. The surface pressure in Fig. 10a shows a negative anomaly ~~for grid segment 4 and larger~~ with peak values around ~~-1.3 -1.2~~ hPa after about 30 min of integration time ~~;~~ ~~This anomaly appears to have decayed~~ for the LBC flag OFF setting. An opposing positive but slightly weaker anomaly of ~~around 0.9 hPa is visible for the LBC flag ON setting, with the peak shifted to around 70 min. Both differences appear to have converged after approximately 2 hours. The spread of all surface pressure curves after 3 hours is approximately 2 hPa, which is about twice as large as the spin-up effects at approximately 30 min, by which point they have decayed to near-zero values.~~  
425 around 0.9 hPa is visible for the LBC flag ON setting, with the peak shifted to around 70 min. Both differences appear to have converged after approximately 2 hours. The spread of all surface pressure curves after 3 hours is approximately 2 hPa, which is about twice as large as the spin-up effects at approximately 30 min, by which point they have decayed to near-zero values. The 2-m temperature curve in Fig. 10b also ~~appears to show~~ shows a systematic negative peak of around ~~-0.08 -0.06~~ K at 30 min ~~;~~ ~~and the~~ for LBC flag OFF, and a positive peak of around 0.05 K at 75 min for LBC flag ON. Temperature differences ~~likewise vanish after approximately 2 hours. The curves for 2-m specific humidity for the later segments peaks show positive differences for both LBC flag settings, with peak values of 0.07 g kg<sup>-1</sup> at 45 min with a value of approximately 0.1 g for LBC flag OFF and 0.05 g kg<sup>-1</sup> .The at 120 min for LBC flag ON. The specific humidity difference for the LBC flag ON setting converges more slowly than for LBC flag OFF, with near-zero values not yet reached by 3 hours. The individual curves for total column water vapor (TCWV), liquid and ice water path (LWP, IWP) in Figs. 10d-f show considerable variability at 3 hours,~~  
430 likewise vanish after approximately 2 hours. The curves for 2-m specific humidity for the later segments peaks show positive differences for both LBC flag settings, with peak values of 0.07 g kg<sup>-1</sup> at 45 min with a value of approximately 0.1 g for LBC flag OFF and 0.05 g kg<sup>-1</sup> .The at 120 min for LBC flag ON. The specific humidity difference for the LBC flag ON setting converges more slowly than for LBC flag OFF, with near-zero values not yet reached by 3 hours. The individual curves for total column water vapor (TCWV), liquid and ice water path (LWP, IWP) in Figs. 10d-f show considerable variability at 3 hours,  
435 and systematic spin-up effects are hardly noticeable in comparison to this variability. Qualitatively, slightly enhanced values are visible for latter variables. It can therefore be concluded that the spin-up described here is of a more dynamic nature over the three-hour window. The LBC flag ON setting tends to produce slightly larger mean peak values for TCWV and IWP, and smaller ones for LWP, and its peak consistently occurs later than for LBC flag OFF. Overall, the LBC flag ON setting tends to produce smaller peak differences for surface pressure and near-surface temperature, suggesting it may be the preferable choice

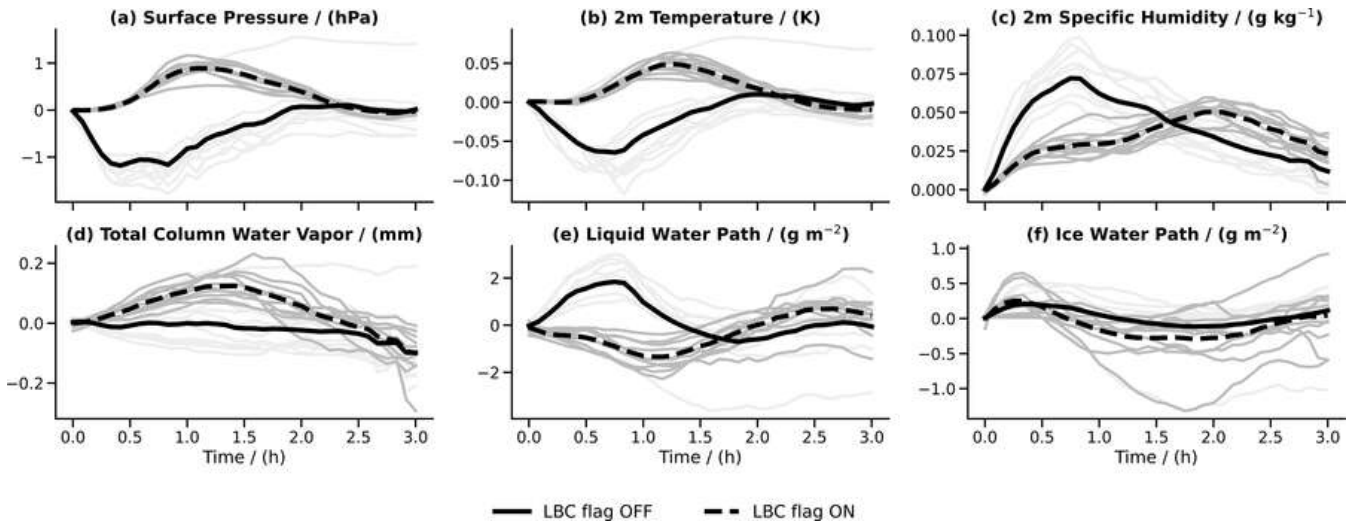

**Figure 10.** Temporal evolution of the respective median values of surface and integrated cloud variables evaluated in the circular Lagrangian analysis region. The respective colored curves show the development of instantaneous difference between values from segment  $k$  and the corresponding values from segment  $k - 1$  extended by 3 hours, for (a) surface pressure, (b) 2 m temperature, (c) 2 m specific humidity, (d) total column water vapor, (e) liquid water path, and (f) ice water path. Results are shown for the grid segments of the medium setup with 12h-reinit. For all Gray curves show the evolution for individual segments, while the anomaly relative to thick black curve shows the respective values at the segment init is shown mean across all segments. The gray vertical lines mark zero and two hours. Two parameter settings are compared: the experiment with the LBC flag deactivated (`init_latbc_from_fg=.FALSE.`), thin dashed light gray and solid black lines) and 0.5 hours the experiment with the LBC flag activated (`init_latbc_from_fg=.TRUE.`) after init, which are used for subsequent analyses (thin gray and dashed black lines).

440 for future applications, though its re-initialization effects appear to persist somewhat longer legitimating our choice of the LBC flag OFF setting for the production runs in this study.

Figure 11 provides a comprehensive statistical comparison of spin-up re-initialization effects across different configurations. The analysis follows a three-step process: First, nine percentiles (10-90As in Fig. 10, the analysis evaluates percentiles from segment  $k$ , here taken 30 minutes after initialization, and segment  $k - 1$  extended correspondingly. Nine percentiles (10-90% in 10% steps) were computed for selected variables, as their relative behavior showed similar patterns. Second, anomalies at 30 minutes were calculated relative to a reference value (the mean of values at 0 and 2 hours). Finally, histograms were created separately for each grid segment and then stacked of each field are computed across the Lagrangian analysis region separately, and their differences are taken. These per-segment differences are visualized as stacked histograms, with color coding by segment to enable direct comparison between setups.

450 The statistical results reveal distinct patterns for different atmospheric variables. Spin-up effects due to re-initialization Re-initialization effects are particularly visible when the distribution of values for the initial segments (blue colors) deviates from the distribution of the later grid segments (red colors) values in the distributions significantly deviate from zero. For

surface pressure, this pattern is clearly evident in Figs. 11a and 11e for the narrow setup. Surface pressure values ~~for the initial grid segment scatter around zero, while for later segments, a distribution shifted into the negative range emerges~~ scatter between -1 and -2 hPa. Comparing the effects of re-initialization time shows that longer intervals lead to slightly larger ~~spin-up~~ re-initialization effects in surface pressure (comparing Figs. 11a,e for narrow setup and Figs. 11i,m for medium setup). Domain size also influences these effects: larger domains (Figs. 11m,q,u) show considerably less deviation from zero at 30 minutes, indicating that systematic ~~spin-up~~ re-initialization effects are less pronounced for larger domains. For temperature, ~~domain size effects are also similar effects are~~ clearly visible. The ~~mode of the distribution shifts from -0.1 K in the narrow setup (Fig. 11b) to -0.07 K in the medium setup (Fig. 11j)~~ value appear to be distributed to slightly lower magnitudes for the 12h-reinit setup than for the 24h-reinit setup. For large and x-large setups, temperature anomalies ~~for later segments~~ scatter around zero. ~~The initial spin-up (blue bars) shows positive anomalies between 0.05 and 0.1 K for all segments.~~ Cloud variables such as LWP and IWP show significant spread in the narrow setup (Figs. 11c,d,g,h). As domain size increases, this variability decreases, likely due to more robust spatial statistics. The considerable variability in cloud variables masks potential ~~spin-up~~ re-initialization effects. Overall, while our hurricane-centric workflow introduces uncertainties through ~~spin-up~~ re-initialization effects, these remain sufficiently small and are outweighed by the substantial efficiency gains achieved.

## 4 Conclusions

This study presents a flexible workflow for the atmospheric model ICON that enables efficient high-resolution simulations in a hurricane-centric reference framework through a segment-based grid and pre-processing approach. The methodology demon-  
470 strates the general feasibility of conducting hectometer-resolution simulations of large, organized atmospheric phenomena like hurricanes in the tropics. Instead of investing in fixed and spatially extended regional domains throughout the entire simulation period, our flexible method follows the motion of a hurricane and generates tailored grid segments.

The technical implementation successfully automates key components of the workflow, including hurricane tracking, flexi-  
475 ble grid generation, and initial condition preparation and merging across consecutive segments. The segment concept, which divides hurricane tracks into overlapping temporal windows of 12-24 hours, provides a practical framework for efficient utilization of computational resources. The workflow toolkit demonstrates portability across different HPC platforms, having been successfully deployed on both DKRZ Levante and JSC JUWELS systems with appropriate platform-specific configurations.

The application of the workflow is demonstrated for Hurricane Paulette (2020). High-resolution simulations with grid spac-  
480 ings down to 300 m were performed using different segment configurations. Variations in re-initialization intervals of 12h and 24h are explored that determine the respective along-track lengths of the segments. Additionally, different overall domain sizes are investigated by varying the across-track widths with tested configurations being rather narrow, medium-sized, large and extra large. The results indicate that the hurricane track remains consistent with the base run and mainly depend on the across-track size of the chosen configuration, while intensity metrics such as minimum pressure and maximum wind speed exhibit sensitivity to resolution in our multi-nested setups. A Lagrangian framework enables a hurricane-centric view, facilitating  
485 continuous analysis of variables like liquid and ice water path across the segmented simulations.



**Figure 11.** Statistical summary of potential spin-up re-initialization effects plotted as colored bars stacked on top of each other for each segment. For The color coding is the time of 0.5 hours same as in Fig. 6. At 30 minutes after the respective initialization of segment  $k$ , nine different percentiles in the range between 10 and 90% (10–90% in steps of 10% steps) were calculated in of each field are computed across the Lagrangian analysis region separately for segment  $k$  and converted into anomalies relative to a reference value. The reference value was chosen as the average between the values at times 0 segment  $k - 1$  extended by 3 h, and 2 hours their pairwise differences are taken. All values obtained in this way were These per-segment differences are statistically summarized as probability density functions and plotted as colored bars stacked on top of each other for each segment. The six rows show the respective setups, with the narrow and medium setups shown for re-initialization periods of 12 h and 24 h, respectively. The columns show surface pressure, 2 m temperature, liquid water path, and ice water path. The spin-up re-initialization analyses are only shown for the outer nest with a grid spacing of approximately 1 km.

The increase in computational efficiency is substantial compared to traditional fixed-domain approaches. The hurricane-centric method A track-following tube geometry alone reduces resource requirements by factors of 13–175 depending on domain

configuration, with the narrow setup giving the largest gain in computational efficiency 1.7–7.6 relative to an appropriately chosen longitude-latitude bounding box around the hurricane. Segmenting the tube into short, frequently re-initialized intervals adds a further factor of 2–6, yielding total speedups of up to 42 for the narrowest three-nest configuration. The setup with 12-hour re-initialization intervals proves to be more efficient than 24-hour intervals, requiring 35–45 % fewer computational resources while maintaining comparable simulation quality. Domain size scaling shows predictable resource scaling, with the twice as large medium-width configurations requiring approximately 2.3 times the resources of narrow configurations. However, the approach has notable limitations when the across-track width is set too narrowly, the domain may fail to encompass the entire phenomenon, a shortcoming that becomes especially evident for our narrow-size configurations. The analysis of spin-up re-initialization effects reveals systematic but manageable impacts during segment transitions, with surface pressure showing negative anomalies on the order of 1 hPa that decay within 2 hours after re-initialization. The spin-up re-initialization effects are more pronounced in narrower domain configurations but remain sufficiently small to justify the substantial computational efficiency gains achieved by the hurricane-centric approach.

Several promising directions for methodological enhancement emerge from this work. On the technical side, extending the workflow to support more than three nesting levels would provide greater refinement flexibility and enable even finer resolution simulations. Similarly, offering greater flexibility in selecting the grid from which the refinement cycle is initiated (currently the grid of the base run) would allow for more diverse and independent nesting hierarchies. A further interesting area for development lies in improving the re-initialization procedure itself. Currently, the distance-weighted blending approach, while effective, could potentially be enhanced by integrating techniques from data assimilation, such as the Incremental Analysis Update (IAU) method available in the numerical weather prediction configuration of the ICON model. This approach might have the potential to substantially reduce spurious artifacts arising from the merging of initial conditions between consecutive segments. Additionally, future work could also investigate how the method performs over land, where re-initialization of subgrid-scale heterogeneities in land surface properties can be challenging and may introduce additional difficulties. Importantly, all such technical improvements must maintain spatial and structural consistency of simulated core variables across segment transitions such that Lagrangian analyses remain continuous and meaningful.

Beyond technical refinements, the computational efficiency gains achieved here enable new scientific applications. The method now makes high-resolution hectometer-scale simulations of additional hurricanes computationally feasible, opening opportunities for detailed dynamical analysis and process studies of a broader range of tropical storms. The reduced computational cost further enables simulation ensembles to be conducted in scientific studies, providing higher confidence in identifying systematic effects. Particularly noteworthy is the potential for perturbed parameter ensembles that would deepen our understanding of how model parameterizations influence the representation of convective organization, eyewall structure, and other small-scale phenomena in tropical cyclones. These applications demonstrate how advances in efficient simulation frameworks can open new avenues for investigating the cloud physics and dynamics of extreme atmospheric phenomena.

520 *Code and data availability.* The current version of the hurricane-centric workflow toolkit is available under <https://doi.org/10.5281/zenodo.18271898> (Senf, 2026c). It depends on cdo (see Schulzweida, 2023), the DWD ICON tools available at [https://gitlab.dkrz.de/dwd-sw/dwd\\_icon\\_tools](https://gitlab.dkrz.de/dwd-sw/dwd_icon_tools) (last accessed 27 January 2026, restricted access) and the extpar utility available at <https://github.com/C2SM/extpar> (last accessed 27 January 2026, toolkit tested with version v5.13). ICON open source release v2025.04 is published at <https://doi.org/10.35089/wdcc/iconrelease2025.04> and a patch to enable consistent re-initialization of complete cloud microphysics is available under <https://doi.org/10.5281/zenodo.18387047> (Senf, 2026d). ICON model v2.6.6 has restricted access and a patch to enable variable SSTs in a multiple nest setup is available under <https://doi.org/10.5281/zenodo.18385022> (Senf, 2026a). Initial, boundary and grid data from the base run used to run the hurricane-centric workflow are available under [https://www.wdc-climate.de/ui/entry?acronym=DKRZ\\_LTA\\_1376\\_dsg0001](https://www.wdc-climate.de/ui/entry?acronym=DKRZ_LTA_1376_dsg0001) (Senf, 2025). Plots and analysis were created mainly using Jupyter notebooks available under <https://doi.org/10.5281/zenodo.19002039> (Senf, 2026b).

530 *Author contributions.* FS lead the development of the workflow and the drafting of the manuscript. RC contributed to the writing of the manuscript and the interpretation of the results.

*Competing interests.* The authors declare that they have no conflict of interest.

535 *Acknowledgements.* The development was supported by the IFCES2 project funded by BMFTR (formerly known as BMBF - Federal Ministry of Education and Research) under grant number 16ME0689K as part of the SCALEXA funding initiative, which in turn was funded by the European Union - NextGenerationEU. Fabian Senf acknowledges funding from the CleanCloud project (grant: 101137639). We would like to thank Manoel Römmer for his comments and help with the workflow development. We are particularly grateful to Bernd Heinold, Ina Tegen, Jason Müller, and Jan Kretzschmar, [Nadja Omanovic](#), and [two anonymous reviewers](#) whose valuable comments contributed significantly to improving the manuscript. We also thank the ICON consortium for their continuous support and engagement in pushing ICON development to the next level. We gratefully acknowledge the computing time and storage resources granted on the supercomputer JUWELS at Jülich Supercomputing Centre (JSC) under project IFCES2-SCALEXA and on the supercomputer Levante at the German Climate Computing Centre (DKRZ) under project bb1376.

540 We would like to mention the use of DeepL to improve the grammatical and language quality of the manuscript and the use of github copilot for AI-assisted coding and debugging of the workflow toolkit.

## References

- Baldauf, M., Seifert, A., Förstner, J., Majewski, D., Raschendorfer, M., and Reinhardt, T.: Operational Convective-Scale Numerical Weather Prediction with the COSMO Model: Description and Sensitivities, *Mon. Wea. Rev.*, 139, 3887–3905, <https://doi.org/10.1175/mwr-d-10-05013.1>, 2011.
- Bechtold, P., Köhler, M., Jung, T., Doblas-Reyes, F., Leutbecher, M., Rodwell, M. J., Vitart, F., and Balsamo, G.: Advances in simulating atmospheric variability with the ECMWF model: From synoptic to decadal time-scales, *Q. J. R. Meteorolog. Soc.*, 134, 1337–1351, <https://doi.org/10.1002/qj.289>, 2008.
- Bender, M. A. and Ginis, I.: Real-Case Simulations of Hurricane–Ocean Interaction Using A High-Resolution Coupled Model: Effects on Hurricane Intensity, *Mon. Weather Rev.*, 128, 917 – 946, [https://doi.org/10.1175/1520-0493\(2000\)128<0917:RCSOHO>2.0.CO;2](https://doi.org/10.1175/1520-0493(2000)128<0917:RCSOHO>2.0.CO;2), 2000.
- Davis, C., Wang, W., Chen, S. S., Chen, Y., Corbosiero, K., DeMaria, M., Dudhia, J., Holland, G., Klemp, J., Michalakes, J., Reeves, H., Rotunno, R., Snyder, C., and Xiao, Q.: Prediction of Landfalling Hurricanes with the Advanced Hurricane WRF Model, *Mon. Weather Rev.*, 136, 1990 – 2005, <https://doi.org/10.1175/2007MWR2085.1>, 2008.
- Davis, C., Wang, W., Cavallo, S., Done, J., Dudhia, J., Fredrick, S., Michalakes, J., Caldwell, G., Engel, T., and Torn, R.: High-Resolution Hurricane Forecasts, *Comput. Sci. Eng.*, 13, 22–30, <https://doi.org/10.1109/MCSE.2010.74>, 2011.
- Dipankar, A., Stevens, B., Heinze, R., Moseley, C., Zängl, G., Giorgetta, M., and Brdar, S.: Large eddy simulation using the general circulation model ICON, *J. Adv. Model. Earth Syst.*, 7, 963–986, <https://doi.org/10.1002/2015MS000431>, 2015.
- Dong, J., Liu, B., Zhang, Z., Wang, W., Mehra, A., Hazelton, A. T., Winterbottom, H. R., Zhu, L., Wu, K., Zhang, C., Tallapragada, V., Zhang, X., Gopalakrishnan, S., and Marks, F.: The Evaluation of Real-Time Hurricane Analysis and Forecast System (HAFS) Stand-Alone Regional (SAR) Model Performance for the 2019 Atlantic Hurricane Season, *Atmosphere*, 11, <https://doi.org/10.3390/atmos11060617>, 2020.
- Enz, B. M., Engelmann, J. P., and Lohmann, U.: Use of threshold parameter variation for tropical cyclone tracking, *Geosci. Model Dev.*, 16, 5093–5112, <https://doi.org/10.5194/gmd-16-5093-2023>, 2023.
- Gao, K., Harris, L., Bender, M., Chen, J.-H., Zhou, L., and Knutson, T.: Regulating Fine-Scale Resolved Convection in High-Resolution Models for Better Hurricane Track Prediction, *Geophys. Res. Lett.*, 50, e2023GL103329, <https://doi.org/https://doi.org/10.1029/2023GL103329>, e2023GL103329 2023GL103329, 2023.
- Gopalakrishnan, S. G., Bacon, D. P., Ahmad, N. N., Boybeyi, Z., Dunn, T. J., Hall, M. S., Jin, Y., Lee, P. C. S., Mays, D. E., Madala, R. V., Sarma, A., Turner, M. D., and Wait, T. R.: An Operational Multiscale Hurricane Forecasting System, *Mon. Weather Rev.*, 130, 1830 – 1847, [https://doi.org/10.1175/1520-0493\(2002\)130<1830:AOMHFS>2.0.CO;2](https://doi.org/10.1175/1520-0493(2002)130<1830:AOMHFS>2.0.CO;2), 2002.
- Gutmann, E. D., Rasmussen, R. M., Liu, C., Ikeda, K., Bruyere, C. L., Done, J. M., Garrè, L., Friis-Hansen, P., and Veldore, V.: Changes in Hurricanes from a 13-Yr Convection-Permitting Pseudo–Global Warming Simulation, *J. Climate*, 31, 3643 – 3657, <https://doi.org/10.1175/JCLI-D-17-0391.1>, 2018.
- Heikenfeld, M., Marinescu, P. J., Christensen, M., Watson-Parris, D., Senf, F., van den Heever, S. C., and Stier, P.: tobac 1.2: towards a flexible framework for tracking and analysis of clouds in diverse datasets, *Geosci. Model Dev.*, 12, 4551–4570, <https://doi.org/10.5194/gmd-12-4551-2019>, 2019.
- Heinze, R., Dipankar, A., Henken, C. C., Moseley, C., Sourdeval, O., Trömel, S., Xie, X., Adamidis, P., Ament, F., Baars, H., Barthlott, C., Behrendt, A., Blahak, U., Bley, S., Brdar, S., Brueck, M., Crewell, S., Deneke, H., Girolamo, P. D., Evaristo, R., Fischer, J., Frank, C., Friederichs, P., Göcke, T., Gorges, K., Hande, L., Hanke, M., Hansen, A., Hege, H.-C., Hoose, C., Jahns, T., Kalthoff, N., Klocke,

- 580 D., Kneifel, S., Knippertz, P., Kuhn, A., van Laar, T., Macke, A., Maurer, V., Mayer, B., Meyer, C. I., Muppa, S. K., Neggers, R. A. J., Orlandi, E., Pantillon, F., Pospichal, B., Röber, N., Scheck, L., Seifert, A., Seifert, P., Senf, F., Siligam, P., Simmer, C., Steinke, S., Stevens, B., Wapler, K., Weniger, M., Wulfmeyer, V., Zängl, G., Zhang, D., and Quaas, J.: Large-eddy simulations over Germany using ICON: a comprehensive evaluation, *Quart. J. Roy. Meteor. Soc.*, 143, 69–100, <https://doi.org/10.1002/qj.2947>, 2017.
- Hersbach, H., Bell, B., Berrisford, P., Hirahara, S., Horányi, A., Muñoz-Sabater, J., Nicolas, J., Peubey, C., Radu, R., Schepers, D., Simmons, 585 A., Soci, C., Abdalla, S., Abellan, X., Balsamo, G., Bechtold, P., Biavati, G., Bidlot, J., Bonavita, M., De Chiara, G., Dahlgren, P., Dee, D., Diamantakis, M., Dragani, R., Flemming, J., Forbes, R., Fuentes, M., Geer, A., Haimberger, L., Healy, S., Hogan, R. J., Hólm, E., Janisková, M., Keeley, S., Laloyaux, P., Lopez, P., Lupu, C., Radnoti, G., de Rosnay, P., Rozum, I., Vamborg, F., Villaume, S., and Thépaut, J.-N.: The ERA5 global reanalysis, *Q. J. R. Meteorolog. Soc.*, 146, 1999–2049, <https://doi.org/https://doi.org/10.1002/qj.3803>, 2020.
- Hogan, R. J. and Bozzo, A.: A Flexible and Efficient Radiation Scheme for the ECMWF Model, *J. Adv. Model. Earth Syst.*, 10, 1990–2008, 590 <https://doi.org/https://doi.org/10.1029/2018MS001364>, 2018.
- Hohenegger, C., Korn, P., Linardakis, L., Redler, R., Schnur, R., Adamidis, P., Bao, J., Bastin, S., Behraves, M., Bergemann, M., Biercamp, J., Bockelmann, H., Brokopf, R., Brüggemann, N., Casaroli, L., Chegini, F., Datsis, G., Esch, M., George, G., Giorgetta, M., Gutjahr, O., Haak, H., Hanke, M., Ilyina, T., Jahns, T., Jungclaus, J., Kern, M., Klocke, D., Kluft, L., Kölling, T., Kornbluh, L., Kosukhin, S., Kroll, C., Lee, J., Mauritsen, T., Mehlmann, C., Mieslinger, T., Naumann, A. K., Paccini, L., Peinado, A., Praturi, D. S., Putrasahan, 595 D., Rast, S., Riddick, T., Roeber, N., Schmidt, H., Schulzweida, U., Schütte, F., Segura, H., Shevchenko, R., Singh, V., Specht, M., Stephan, C. C., von Storch, J.-S., Vogel, R., Wengel, C., Winkler, M., Ziemann, F., Marotzke, J., and Stevens, B.: ICON-Sapphire: simulating the components of the Earth system and their interactions at kilometer and subkilometer scales, *Geosci. Model Dev.*, 16, 779–811, <https://doi.org/10.5194/gmd-16-779-2023>, 2023.
- ICON Documentation: Build and Run: Input Data — Lateral Boundary Conditions, [https://docs.icon-model.org/documentation/buildrun/buildrun\\_input\\_data.html](https://docs.icon-model.org/documentation/buildrun/buildrun_input_data.html), last accessed: 1 July 2026, 2026.
- 600 ICON partnership: ICON release 2025.04, <https://doi.org/10.35089/wdcc/iconrelease2025.04>, dWD; MPI-M; DKRZ; KIT; C2SM, 2025.
- Kleppenk, S., Muccione, V., Raible, C. C., Bresch, D. N., Koellner-Heck, P., and Stocker, T. F.: Tropical cyclones in ERA-40: A detection and tracking method, *Geophys. Res. Lett.*, 35, <https://doi.org/https://doi.org/10.1029/2008GL033880>, 2008.
- Klocke, D., Frauen, C., Engels, J. F., Alexeev, D., Redler, R., Schnur, R., Haak, H., Kornbluh, L., Brüggemann, N., Chegini, F., Römmer, M., Hoffmann, L., Griessbach, S., Bode, M., Coles, J., Gila, M., Sawyer, W., Calotoiu, A., Budanaz, Y., Mazumder, P., Copik, M., Weber, B., Herten, A., Bockelmann, H., Hoefler, T., Hohenegger, C., and Stevens, B.: Computing the Full Earth System at 1km Resolution, in: *Proceedings of the International Conference for High Performance Computing, Networking, Storage and Analysis, SC '25*, p. 125–136, Association for Computing Machinery, New York, NY, USA, ISBN 9798400714665, <https://doi.org/10.1145/3712285.3771789>, 2025.
- Kurihara, Y., Tuleya, R. E., and Bender, M. A.: The GFDL Hurricane Prediction System and Its Performance in the 1995 Hurricane Season, 610 *Mon. Weather Rev.*, 126, 1306 – 1322, [https://doi.org/10.1175/1520-0493\(1998\)126<1306:TGHPSA>2.0.CO;2](https://doi.org/10.1175/1520-0493(1998)126<1306:TGHPSA>2.0.CO;2), 1998.
- Landsea, C. W. and Franklin, J. L.: Atlantic Hurricane Database Uncertainty and Presentation of a New Database Format, *Mon. Weather Rev.*, 141, 3576 – 3592, <https://doi.org/10.1175/MWR-D-12-00254.1>, 2013.
- Mauritsen, T., Redler, R., Esch, M., Stevens, B., Hohenegger, C., Klocke, D., Brokopf, R., Haak, H., Linardakis, L., Röber, N., et al.: Early development and tuning of a global coupled cloud resolving model, and its fast response to increasing CO<sub>2</sub>, *Tellus Series A: Dynamic 615 Meteorology and Oceanography*, 74, 346–363, <https://doi.org/https://doi.org/10.16993/tellusa.54>, 2022.
- Müller, W. A., Früh, B., Korn, P., Potthast, R., Baehr, J., Bettens, J.-M., Bölöni, G., Brienen, S., Fröhlich, K., Helmert, J., Jungclaus, J., Köhler, M., Lorenz, S., Schneidereit, A., Schnur, R., Schulz, J.-P., Schlemmer, L., Sgoff, C., Pham, T. V., Pohlmann, H., Vogel, B., Vogel, H.,

Wirth, R., Zaehle, S., Zängl, G., Stevens, B., and Marotzke, J.: ICON: Toward Vertically Integrated Model Configurations for Numerical Weather Prediction, Climate Predictions, and Projections, *Bull. Am. Meteorol. Soc.*, 106, E1017 – E1031, <https://doi.org/10.1175/BAMS-D-24-0042.1>, 2025.

620 National Hurricane Center: Tropical Cyclone Report: Hurricane Paulette (AL172020), Tech. rep., National Hurricane Center, Miami, FL, USA, [https://www.nhc.noaa.gov/data/tcr/AL172020\\_Paulette.pdf](https://www.nhc.noaa.gov/data/tcr/AL172020_Paulette.pdf), last access: 5 February 2026, 2021.

Satoh, M., Noda, A. T., Seiki, T., Chen, Y.-W., Kodama, C., Yamada, Y., Kuba, N., and Sato, Y.: Toward reduction of the uncertainties in climate sensitivity due to cloud processes using a global non-hydrostatic atmospheric model, *Prog. Earth Planet. Sci.*, 5, 67, <https://doi.org/10.1186/s40645-018-0226-1>, 2018.

625 Satoh, M., Stevens, B., Judt, F., Khairoutdinov, M., Lin, S.-J., Putman, W. M., and Düben, P.: Global Cloud-Resolving Models, *Curr. Clim. Change Rep.*, <https://doi.org/10.1007/s40641-019-00131-0>, 2019.

Schulzweida, U.: CDO User Guide, <https://doi.org/10.5281/zenodo.10020800>, 2023.

Segura, H., Pedruzo-Bagazgoitia, X., Weiss, P., Müller, S. K., Rackow, T., Lee, J., Dolores-Tesillos, E., Benedict, I., Aengenheyster, M., Aguridan, R., Arduini, G., Baker, A. J., Bao, J., Bastin, S., Baulenas, E., Becker, T., Beyer, S., Bockelmann, H., Brüggemann, N., Brunner, L., Cheedela, S. K., Das, S., Denissen, J., Dragaud, I., Dziekan, P., Ekblom, M., Engels, J. F., Esch, M., Forbes, R., Frauen, C., Freischem, L., García-Maroto, D., Geier, P., Gierz, P., González-Cervera, A., Grayson, K., Griffith, M., Gutjahr, O., Haak, H., Hadade, I., Haslehner, K., ul Hasson, S., Hegewald, J., Kluff, L., Koldunov, A., Koldunov, N., Kölling, T., Koseki, S., Kosukhin, S., Kousal, J., Kuma, P., Kumar, A. U., Li, R., Maury, N., Meindl, M., Milinski, S., Mogensen, K., Niraula, B., Nowak, J., Praturi, D. S., Proske, U., Putrasahan, D., Redler, R., Santuy, D., Sármany, D., Schnur, R., Scholz, P., Sidorenko, D., Spät, D., Sützl, B., Takasuka, D., Tompkins, A., Uribe, A., Valentini, M., Veerman, M., Voigt, A., Warnau, S., Wachsmann, F., Waclawczyk, M., Wedi, N., Wieners, K.-H., Wille, J., Winkler, M., Wu, Y., Ziemen, F., Zimmermann, J., Bender, F. A.-M., Bojovic, D., Bony, S., Bordoni, S., Brehmer, P., Dengler, M., Dutra, E., Faye, S., Fischer, E., van Heerwaarden, C., Hohenegger, C., Järvinen, H., Jochum, M., Jung, T., Jungclaus, J. H., Keenlyside, N. S., Klocke, D., Konow, H., Klose, M., Malinowski, S., Martius, O., Mauritsen, T., Mellado, J. P., Mieslinger, T., Mohino, E., Pawłowska, H., Peters-von Gehlen, K., Sarré, A., Sobhani, P., Stier, P., Tuppi, L., Vidale, P. L., Sandu, I., and Stevens, B.: nextGEMS: entering the era of kilometer-scale Earth system modeling, *Geosci. Model Dev.*, 18, 7735–7761, <https://doi.org/10.5194/gmd-18-7735-2025>, 2025.

630 Seifert, A. and Beheng, K. D.: A two-moment cloud microphysics parameterization for mixed-phase clouds. Part 1: Model description, *Meteor. Atmos. Phys.*, 92, 45–66, <https://doi.org/https://doi.org/10.1007/s00703-005-0112-4>, 2006.

Senf, F.: Data for Nested Hurricane-Centric ICON Runs for Hurricane Paulette (2020), [https://www.wdc-climate.de/ui/entry?acronym=DKRZ\\_LTA\\_1376\\_dsg0001](https://www.wdc-climate.de/ui/entry?acronym=DKRZ_LTA_1376_dsg0001), 2025.

645 Senf, F.: ICON v2.6.6 Patch: for flexible SSTs in nested domains, <https://doi.org/10.5281/zenodo.18385022>, 2026a.

Senf, F.: Jupyter Notebooks for Plotting Analysis of "Advancing Hurricane-Centric Simulations with ICON", Submission Release, <https://doi.org/10.5281/zenodo.19002039>, 2026b.

Senf, F.: Hurricane Centric Toolset Version v2026.01 - Common Initialization and Perturbation Experiment Capabilities, <https://doi.org/10.5281/zenodo.18271898>, 2026c.

650 Senf, F.: ICON v2025-04-2 Patch: for handling vertical interpolation in init of two-moment cloud microphysics, <https://doi.org/10.5281/zenodo.18387047>, 2026d.

Senf, F., Voigt, A., Clerbaux, N., Hünerbein, A., and Deneke, H.: Increasing Resolution and Resolving Convection Improve the Simulation of Cloud-Radiative Effects Over the North Atlantic, *J. Geophys. Res. Atmos.*, 125, e2020JD032667, <https://doi.org/10.1029/2020JD032667>, 2020.

655 e2020JD032667 10.1029/2020JD032667, 2020.

- Shukla, J., Palmer, T. N., Hagedorn, R., Hoskins, B., Kinter, J., Marotzke, J., Miller, M., and Slingo, J.: Toward a New Generation of World Climate Research and Computing Facilities, *Bull. Am. Meteorol. Soc.*, 91, 1407–1412, <https://doi.org/10.1175/2010BAMS2900.1>, 2010.
- 660 Sokolowsky, G. A., Freeman, S. W., Jones, W. K., Kukulies, J., Senf, F., Marinescu, P. J., Heikenfeld, M., Brunner, K. N., Bruning, E. C., Collis, S. M., Jackson, R. C., Leung, G. R., Pfeifer, N., Raut, B. A., Saleeby, S. M., Stier, P., and van den Heever, S. C.: *tobac* v1.5: introducing fast 3D tracking, splits and mergers, and other enhancements for identifying and analysing meteorological phenomena, *Geosci. Model Dev.*, 17, 5309–5330, <https://doi.org/10.5194/gmd-17-5309-2024>, 2024.
- Stevens, B., Acquistapace, C., Hansen, A., , and Coauthors incl. Senf, F.: The Added Value of Large-eddy and Storm-resolving Models for Simulating Clouds and Precipitation, *J. Meteor. Soc. Japan*, 98, 395–435, <https://doi.org/10.2151/jmsj.2020-021>, 2020.
- 665 Tiedtke, M.: A Comprehensive Mass Flux Scheme for Cumulus Parameterization in Large-Scale Models, *Mon. Wea. Rev.*, 117, 1779–1800, [https://doi.org/10.1175/1520-0493\(1989\)117<1779:acmfsf>2.0.co;2](https://doi.org/10.1175/1520-0493(1989)117<1779:acmfsf>2.0.co;2), 1989.
- Ullrich, P. A., Zarzycki, C. M., McClenny, E. E., Pinheiro, M. C., Stansfield, A. M., and Reed, K. A.: *TempestExtremes* v2.1: a community framework for feature detection, tracking, and analysis in large datasets, *Geosci. Model Dev.*, 14, 5023–5048, <https://doi.org/10.5194/gmd-14-5023-2021>, 2021.
- Zängl, G., Reinert, D., Rípodas, P., and Baldauf, M.: The ICON (ICOsahedral Non-hydrostatic) modelling framework of DWD and MPI-M: Description of the non-hydrostatic dynamical core, *Quart. J. Roy. Meteor. Soc.*, 141, 563–579, <https://doi.org/10.1002/qj.2378>, 2014.
- 670 Zängl, G., Reinert, D., and Prill, F.: Grid refinement in ICON v2.6.4, *Geosci. Model Dev.*, 15, 7153–7176, <https://doi.org/10.5194/gmd-15-7153-2022>, 2022.
